# Supplementary material for: Ruthenium(ii)-catalyzed reductive N–O bond cleavage ofN-OR (R = H, alkyl, or acyl) substituted amides and sulfonamides
Source: Royal Society of Chemistry journal article supplement (doi:10.1039/d0qo01093f), 2020-11-13
Supplement: d0qo01093f1.pdf [file d0qo01093f1.pdf]

Supporting information for:

**Ruthenium(II)-Catalyzed Reductive N-O Bond Cleavage of *N*-OR (R = H, alkyl, or acyl)  
Substituted Amides and Sulfonamides**

Tingjie You, Maosheng Zhang, Jianhui Chen,\* Hongmei Liu, and Yuanzhi Xia\*

College of Chemistry and Materials Engineering, Wenzhou University, Wenzhou 325035, China

|                                                                                  |           |
|----------------------------------------------------------------------------------|-----------|
| <b>I. General Information</b>                                                    | <b>1</b>  |
| <b>II. Procedures for the Synthesis of Starting Materials</b>                    | <b>1</b>  |
| <b>III. N-O bond Cleavage of <i>N</i>-OR Substituted Amides and Sulfonamides</b> | <b>5</b>  |
| <b>IV. Gram-scale Reaction</b>                                                   | <b>14</b> |
| <b>V. NMR Spectra</b>                                                            | <b>15</b> |

**I. General Information**

[RuCl<sub>2</sub>(*p*-cymene)]<sub>2</sub> (98%), Ru(PPh<sub>3</sub>)<sub>3</sub>Cl<sub>2</sub> (98%), [RhCp\*Cl<sub>2</sub>]<sub>2</sub> (98%) were purchased from Energy Chemical and used as received. The other commercially available chemicals were used as received. Flash column chromatography was performed using 200–300 mesh silica with the proper solvent system according to thin layer chromatography (TLC) analysis using UV light to visualize the reaction components. NMR spectra were recorded on a Bruker-300 instrument or Bruker-500 instrument. <sup>1</sup>H NMR chemical shifts were referenced to tetramethylsilane (TMS) signal (0 ppm), <sup>13</sup>C NMR chemical shifts were referenced to the solvent resonance [77.00 ppm, CDCl<sub>3</sub>; 40.45, (CD<sub>3</sub>)<sub>2</sub>SO]. The following abbreviations (or combinations thereof) were used to explain multiplicities: s = singlet, d = doublet, t = triplet, m = multiplet, br = broad, q = quadruplet. In this report, all the reactions that require heating were using oil bath as the heating source. High-resolution mass spectra were recorded on an ESI-Q-TOF mass spectrometer.

**II. Procedures for the Synthesis of Starting Materials**

**General procedure for the synthesis of *N*-OR substituted amide:**

**1v** and **1ac** were purchased from commercially available resources and used directly. Other *N*-OR substituted amides and sulfonamides were prepared following literature procedures and the analytical data of the known compounds are consistent with those data which have been previously reported. **1w** and **1x** were prepared according to Route B; **1y**, **1z** and **1aa** were prepared

according to Route C; all the others substrates were prepared according to Route A.

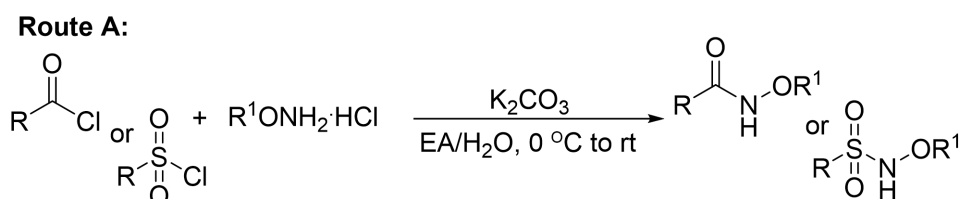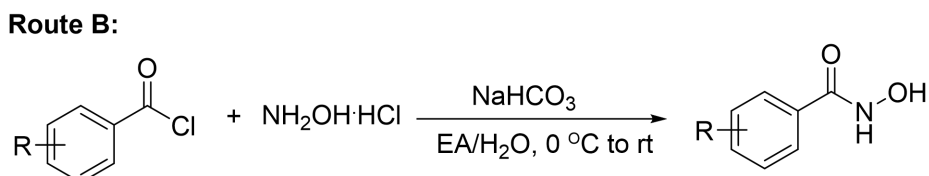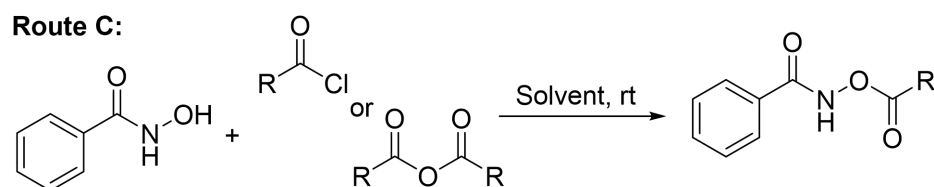

**Route A<sup>1</sup>:** A round-bottomed flask was charged with R<sup>1</sup>O-NH<sub>2</sub>·HCl (12 mmol, 1.2 equiv.), K<sub>2</sub>CO<sub>3</sub> (20 mmol, 2.0 equiv.), ethyl acetate (EA) (50 mL) and H<sub>2</sub>O (25 mL). Then the mixture was added with acyl chloride or sulfonyl chloride (10 mmol) at 0 °C, stirring at room temperature overnight. The reaction was quenched with brine (75 mL), extracted with EA (50 mL x 2). The combined organic layers were dried over anhydrous NaSO<sub>4</sub>, filtered, concentrated under reduced pressure. The residue was purified by flash chromatography on silica gel to afford the desired product.

**Route B:** A round-bottomed flask was charged with NH<sub>2</sub>OH·HCl (12 mmol, 1.2 equiv.), NaHCO<sub>3</sub> (20 mmol, 2.0 equiv.), EA (50 mL) and H<sub>2</sub>O (25 mL). Then the mixture was added with acyl chloride (10 mmol) at 0 °C, stirring at room temperature overnight. The reaction was quenched with brine (75 mL), extracted with EA (50 mL x 2). The combined organic layers were dried over anhydrous NaSO<sub>4</sub>, filtered, concentrated under reduced pressure. The residue was purified by flash chromatography on silica gel to afford the desired product.

**Route C<sup>2</sup>:** For detailed procedures, see reference.

**N-Methoxybenzamide (1a).**<sup>3</sup> <sup>1</sup>H NMR (500 MHz, CDCl<sub>3</sub>) δ 9.36 (bs, 1H), 7.75 (d, *J* = 7.6 Hz, 2H), 7.51 (t, *J* = 7.3 Hz, 1H), 7.41 (t, *J* = 7.4 Hz, 2H), 3.86 (s, 3H).

<sup>1</sup> Guimond, N.; Gouliaras, C.; Fagnou, K. *J. Am. Chem. Soc.* **2010**, *132*, 6908.

<sup>2</sup> Guimond, N.; Gorelsky, S.; Fagnou, K. *J. Am. Chem. Soc.* **2011**, *133*, 6449.

<sup>3</sup> Wrigglesworth, J. W.; Cox, B.; Lloyd-Jones, G. C.; Booker-Milburn, K. I. *Org. Lett.* **2011**, *13*, 5326.

**N-Methoxy-4-methylbenzamide (1b).**<sup>3</sup> <sup>1</sup>H NMR (500 MHz, CDCl<sub>3</sub>) δ 9.16 (bs, 1H), 7.65 (d, *J* = 8.1 Hz, 2H), 7.21 (d, *J* = 7.9 Hz, 2H), 3.86 (s, 3H), 2.38 (s, 3H).

**N,4-Dimethoxybenzamide (1c).**<sup>1</sup> <sup>1</sup>H NMR (500 MHz, CDCl<sub>3</sub>) δ 9.10 (bs, 1H), 7.73 (d, *J* = 8.6 Hz, 2H), 6.90 (d, *J* = 8.6 Hz, 2H), 3.85 (s, 3H), 3.84 (s, 3H).

**4-Fluoro-N-methoxybenzamide (1d).**<sup>4</sup> <sup>1</sup>H NMR (500 MHz, CDCl<sub>3</sub>) δ 9.38 (bs, 1H), 7.80-7.77 (m, 2H), 7.10 (t, *J* = 8.4 Hz, 2H), 3.85 (s, 3H).

**4-Fluoro-N-methoxybenzamide (1e).**<sup>4</sup> <sup>1</sup>H NMR (500 MHz, CDCl<sub>3</sub>) δ 9.43 (bs, 1H), 7.70 (d, *J* = 8.0 Hz, 2H), 7.39 (d, *J* = 8.0 Hz, 2H), 3.85 (s, 3H).

**3-Chloro-N-methoxybenzamide (1f).**<sup>5</sup> <sup>1</sup>H NMR (500 MHz, CDCl<sub>3</sub>) δ 9.33 (bs, 1H), 7.75 (t, *J* = 1.8 Hz, 1H), 7.64-7.62 (m, 1H), 7.49 (ddd, *J* = 8.0, 2.0, 1.0 Hz, 1H), 7.36 (t, *J* = 7.9 Hz, 1H), 3.87 (s, 3H).

**N-Methoxy-2-methylbenzamide (1g).**<sup>4</sup> <sup>1</sup>H NMR (500 MHz, d<sub>6</sub>-DMSO) δ 11.43 (bs, 1H), 7.36 (t, *J* = 7.4 Hz, 1H), 7.30-7.22 (m, 3H), 3.71 (s, 3H), 2.33 (s, 3H).

**2-Ethoxy-N-methoxybenzamide (1h).**<sup>6</sup> <sup>1</sup>H NMR (500 MHz, CDCl<sub>3</sub>) δ 10.33 (bs, 1H), 8.20 (dd, *J* = 7.8, 1.8 Hz, 1H), 7.45 (ddd, *J* = 8.4, 7.3, 1.9 Hz, 1H), 7.10-7.07 (m, 1H), 6.95 (d, *J* = 8.3 Hz, 1H), 4.22 (q, *J* = 7.0 Hz, 2H), 3.89 (s, 3H), 1.54 (t, *J* = 7.0 Hz, 3H).

**N-Methoxy-[1,1'-biphenyl]-2-carboxamide (1i).**<sup>7</sup> <sup>1</sup>H NMR (300 MHz, CDCl<sub>3</sub>) δ 7.79 (bs, 1H), 7.69 (d, *J* = 7.5 Hz, 1H), 7.54 (td, *J* = 7.5, 1.5 Hz, 1H), 7.47-7.40 (m, 7H), 3.55 (s, 3H).

**2-Hydroxy-N-methoxybenzamide (1j).**<sup>8</sup> <sup>1</sup>H NMR (300 MHz, CDCl<sub>3</sub>) δ 11.50 (bs, 1H), 9.20 (bs, 1H), 7.46-7.35 (m, 2H), 7.02 (d, *J* = 8.2 Hz, 1H), 6.86 (t, *J* = 7.5 Hz, 1H), 3.90 (s, 3H).

**N-Methoxy-3,5-dimethylbenzamide (1k).**<sup>6</sup> <sup>1</sup>H NMR (500 MHz, d<sub>6</sub>-DMSO) δ 11.63 (s, 1H), 7.35 (s, 2H), 7.17 (s, 1H), 3.69 (s, 3H), 2.30 (s, 6H).

**2,6-Dichloro-N-methoxybenzamide (1l).** <sup>1</sup>H NMR (500 MHz, d<sub>6</sub>-DMSO) δ 11.82 (bs, 1H), 7.55-7.47 (m, 3H), 3.74 (s, 3H). <sup>13</sup>C NMR (125 MHz, d<sub>6</sub>-DMSO) δ 159.8, 133.2, 132.0, 131.9, 128.2, 63.2. HRMS (ESI<sup>+</sup>) calcd for C<sub>8</sub>H<sub>7</sub>Cl<sub>2</sub>NNaO<sub>2</sub><sup>+</sup> ([M + Na]<sup>+</sup>) 241.9746, found 241.9752.

<sup>4</sup> Rakshit, S.; Grohmann, C.; Besset, T.; Glorius, F. *J. Am. Chem. Soc.* **2011**, *133*, 2350.

<sup>5</sup> Zhong, H.; Yang, D.; Wang, S.; Huang, J. *Chem. Commun.* **2012**, *48*, 3236.

<sup>6</sup> Wang, G.; Yuan, T. *J. Org. Chem.* **2010**, *75*, 476.

<sup>7</sup> Wang, G.; Yuan, T.; Li, D. *Angew. Chem., Int. Ed.* **2011**, *50*, 1380.

<sup>8</sup> Kozlov, M. V.; Kleymenova, A. A.; Romanova, L. I.; Konduktorov K. A.; Smirnova, O. A.; Prasolov, V. S.; Kochetkov, S. N. *Bioorg. Med. Chem. Lett.* **2013**, *23*, 5936.

**N-Methoxy-1-naphthamide (1m).**<sup>4</sup> <sup>1</sup>H NMR (500 MHz, d<sub>6</sub>-DMSO) δ 11.69 (bs, 1H), 8.17 (d, *J* = 7.9 Hz, 1H), 8.05 (d, *J* = 8.0 Hz, 1H), 8.0-7.99 (m, 1H), 7.62-7.53 (m, 4H), 3.81 (s, 3H).

**N-Methoxy-2-naphthamide (1n).**<sup>4</sup> <sup>1</sup>H NMR (500 MHz, CDCl<sub>3</sub>) δ 9.36 (bs, 1H), 8.26 (s, 1H), 7.85 (t, *J* = 7.3 Hz, 3H), 7.78 (d, *J* = 8.3 Hz, 1H), 7.54 (dt, *J* = 14.8, 7.1 Hz, 2H), 3.91 (s, 3H).

**N-Methoxyisonicotinamide (1o).**<sup>2</sup> <sup>1</sup>H NMR (400 MHz, CDCl<sub>3</sub>) δ 9.50 (br s, 1H), 8.73 (br s, 4H), 7.63 (br s, 4H), 3.91 (s, 6H).

**N-Methoxyfuran-2-carboxamide (1p).**<sup>5</sup> <sup>1</sup>H NMR (500 MHz, CDCl<sub>3</sub>) δ 9.02 (bs, 1H), 7.45 (s, 1H), 7.21 (d, *J* = 3.4 Hz, 1H), 6.53-6.52 (m, 1H), 3.89 (s, 3H).

**N-Methoxythiophene-2-carboxamide (1q).**<sup>4</sup> <sup>1</sup>H NMR (500 MHz, CDCl<sub>3</sub>) δ 9.25 (bs, 1H), 7.71 (s, 1H), 7.54 (d, *J* = 4.8 Hz, 1H), 7.10 (dd, *J* = 4.8, 3.9 Hz, 1H), 3.86 (s, 3H).

**N-Methoxy-2-phenylacetamide (1r).**<sup>9</sup> <sup>1</sup>H NMR (500 MHz, CDCl<sub>3</sub>) δ 8.82 (bs, 1H), 7.34-7.26 (m, 5H), 3.70 (s, 3H), 3.48 (s, 2H).

**N-Methoxy-3-phenylpropanamide (1s).**<sup>10</sup> <sup>1</sup>H NMR (400 MHz, CDCl<sub>3</sub>) δ 9.79 (bs, 1H), 7.30-7.13 (m, 5H), 3.62 (s, 3H), 2.94 (t, *J* = 7.8 Hz, 2H), 2.40 (t, *J* = 7.6 Hz, 2H).

**(3r,5r,7r)-N-Methoxyadamantane-1-carboxamide (1t).**<sup>11</sup> <sup>1</sup>H NMR (500 MHz, d<sub>6</sub>-DMSO) δ 10.74 (bs, 1H), 3.53 (s, 3H), 2.50-2.51 (m, 1H), 1.94 (s, 3H), 1.74 (d, *J* = 2.6 Hz, 5H), 1.68-1.61 (m, 6H).

**N-Ethoxybenzamide (1u).**<sup>3</sup> <sup>1</sup>H NMR (500 MHz, CDCl<sub>3</sub>) δ 9.18 (bs, 1H), 7.75 (d, *J* = 7.8 Hz, 2H), 7.50 (t, *J* = 7.3 Hz, 1H), 7.41 (t, *J* = 7.6 Hz, 2H), 4.08 (q, *J* = 6.9 Hz, 2H), 1.31 (t, *J* = 7.0 Hz, 3H).

**N-(Benzyloxy)benzamide (1v).**<sup>3</sup> <sup>1</sup>H NMR (500 MHz, d<sub>6</sub>-DMSO) δ 11.80 (bs, 1H), 7.75 (d, *J* = 7.5 Hz, 2H), 7.55 (t, *J* = 7.2 Hz, 1H), 7.49-7.35 (m, 7H), 4.93 (s, 2H).

**3-Chloro-N-hydroxybenzamide (1x).**<sup>8</sup> <sup>1</sup>H NMR (300 MHz, d<sub>6</sub>-DMSO) δ 11.34 (bs, 1H), 9.17 (bs, 1H), 7.77 (s, 1H), 7.71 (d, *J* = 7.6 Hz, 1H), 7.59 (d, *J* = 7.6 Hz, 1H), 7.49 (t, *J* = 7.8 Hz, 1H).

**N-Hydroxy-4-methoxybenzamide (1y).**<sup>8</sup> <sup>1</sup>H NMR (300 MHz, d<sub>6</sub>-DMSO) δ 11.07 (bs, 1H), 8.90 (bs, 1H), 7.72 (d, *J* = 8.5 Hz, 2H), 6.98 (d, *J* = 8.6 Hz, 2H), 3.79 (s, 3H).

**N-Acetoxybenzamide (1z).**<sup>2</sup> <sup>1</sup>H NMR (500 MHz, CDCl<sub>3</sub>) δ 9.70 (bs, 1H), 7.82 (d, *J* = 8.0 Hz, 2H), 7.56 (t, *J* = 7.5 Hz, 1H), 7.45 (t, *J* = 7.7 Hz, 2H), 2.27 (s, 3H).

**N-(Pivaloyloxy)benzamide (1aa).**<sup>2</sup> <sup>1</sup>H NMR (500 MHz, CDCl<sub>3</sub>) δ 9.68 (bs, 1H), 7.80-7.78 (m,

<sup>9</sup> Willwacher, J.; Rakshit S.; Glorius, F. *Org. Biomol. Chem.* **2011**, *9*, 4736.

<sup>10</sup> Miyata, O.; Koizumi, T.; Asai, H.; Iba R.; Naito, T. *Tetrahedron* **2004**, *60*, 3893.

<sup>11</sup> Yus, M.; Radivoy, G.; Alonso, F. *Synthesis* **2001**, 914.

2H), 7.53-7.51 (m, 1H), 7.43-7.40 (m, 2H), 1.33 (s, 9H).

***N*-(Benzoyloxy)benzamide (1ab).**<sup>2</sup> <sup>1</sup>H NMR (300 MHz, d<sub>6</sub>-DMSO) δ 12.65 (bs, 1H), 8.10 (d, *J* = 7.3 Hz, 2H), 7.89 (d, *J* = 7.1 Hz, 2H), 7.78 (t, *J* = 7.4 Hz, 1H), 7.70-7.49 (m, 5H).

**4-Nitro-*N*-(pivaloyloxy)benzamide (1ac).**<sup>2</sup> <sup>1</sup>H NMR (500 MHz, CDCl<sub>3</sub>) δ 9.72 (s, 1H), 8.29 (d, *J* = 8.4 Hz, 2H), 7.98 (d, *J* = 8.4 Hz, 2H), 1.36 (s, 9H).

***N*-Methyl-*N*-(pivaloyloxy)benzamide (1ad).** <sup>1</sup>H NMR (500 MHz, CDCl<sub>3</sub>) δ 7.52 (d, *J* = 7.3 Hz, 2H), 7.42 (t, *J* = 7.3 Hz, 1H), 7.36 (t, *J* = 7.4 Hz, 2H), 3.37 (s, 3H), 1.03 (s, 9H). <sup>13</sup>C NMR (125 MHz, CDCl<sub>3</sub>) δ 175.4, 171.4, 133.4, 130.5, 127.8, 127.7, 37.8, 26.8, 26.3. HRMS (ESI+ ) calcd for C<sub>13</sub>H<sub>17</sub>NNaO<sub>3</sub><sup>+</sup> ([M + Na]<sup>+</sup>) 258.1101, found 258.1122.

***N*-Methoxybenzenesulfonamide (3a).**<sup>12</sup> <sup>1</sup>H NMR (500 MHz, d<sub>6</sub>-DMSO) δ 10.55 (bs, 1H), 7.86-7.85 (m, 2H), 7.74-7.71 (m, 1H), 7.66-7.62 (m, 2H), 3.66 (s, 3H).

***N*-Methoxy-2-methylbenzenesulfonamide (3b).**<sup>13</sup> <sup>1</sup>H NMR (500 MHz, d<sub>6</sub>-DMSO) δ 10.54 (bs, 1H), 7.85 (d, *J* = 8.2 Hz, 1H), 7.59 (t, *J* = 7.4 Hz, 1H), 7.45-7.42 (m, 2H), 3.62 (s, 3H), 2.60 (s, 3H).

***N*-Methoxy-4-methylbenzenesulfonamide (3c).**<sup>14</sup> <sup>1</sup>H NMR (500 MHz, CDCl<sub>3</sub>) δ 7.82 (d, *J* = 7.9 Hz, 2H), 7.35 (d, *J* = 7.9 Hz, 2H), 7.07 (bs, 1H), 3.79 (s, 3H), 2.45 (s, 3H)

***N*-Methoxy-1-phenylmethanesulfonamide (3d).**<sup>15</sup> <sup>1</sup>H NMR (500 MHz, d<sub>6</sub>-DMSO) δ 10.21 (bs, 1H), 7.41-7.36 (m, 5H), 4.44 (s, 2H), 3.71 (s, 3H).

### **III. N-O bond cleavage of *N*-OR substituted amides and sulfonamides:**

**General procedure for the N-O bond cleavage reaction:** To a 10 mL dried Schlenk flask under air, *N*-OR substituted amide or sulfonamide (0.2 mmol), [RuCl<sub>2</sub>(*p*-cymene)]<sub>2</sub> (0.0031 g, 0.005 mmol), HCOOH/Et<sub>3</sub>N (molar ratio 1/1, 0.5 mL), and H<sub>2</sub>O (0.5 mL) were added in sequence. After stirring at 100 °C for 12 hours, the mixture was quenched with saturated NH<sub>4</sub>Cl (5 mL), extracted with EA (15 mL x 3). The combined organic layers were washed with brine, dried over Na<sub>2</sub>SO<sub>4</sub>, filtered and concentrated under reduced pressure. The residue was purified by flash chromatography on silica gel with PE/EA as the eluent to afford the desired product.

<sup>12</sup> Pu, X.; Li, Q.; Lu, Z.; Yang, X. *Eur. J. Org. Chem.* **2016**, 5937.

<sup>13</sup> Xu, L.; Shu, H.; Liu, Y.; Zhang, S.; Trudell, M. L. *Tetrahedron* **2006**, *62*, 7902.

<sup>14</sup> Xie, W.; Yang, J.; Wang, B.; Li, B. *J. Org. Chem.* **2014**, *79*, 8278.

<sup>15</sup> Ishiwata, Y.; Suzuki, Y.; and Togo, H. *Heterocycles* **2010**, *82*, 339.

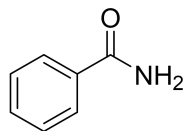

**Benzamide (2a).**<sup>16</sup> Prepared according to the general procedure using 0.0304 g of **1a** (0.2 mmol), and **2a** was obtained as a white solid (0.0225 g, 92% yield) after flash column chromatography. <sup>1</sup>H NMR (500 MHz, CDCl<sub>3</sub>) δ 7.82 (d, *J* = 7.2 Hz, 2H), 7.52 (t, *J* = 7.4 Hz, 1H), 7.44 (t, *J* = 7.6 Hz, 2H), 6.29 (br, 2H); <sup>13</sup>C NMR (125 MHz, CDCl<sub>3</sub>) δ 169.7, 133.5, 132.0, 128.6, 127.4.

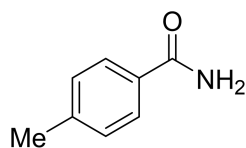

**4-Methylbenzamide (2b).**<sup>17</sup> Prepared according to the general procedure using 0.0332 g of **1b** (0.2 mmol), and **2b** was obtained as a white solid (0.0249 g, 91% yield) after flash column chromatography. <sup>1</sup>H NMR (500 MHz, CDCl<sub>3</sub>) δ 7.71 (d, *J* = 8.1 Hz, 2H), 7.24 (d, *J* = 8.0 Hz, 2H), 6.07 (br, 2H), 2.40 (s, 3H); <sup>13</sup>C NMR (125 MHz, d<sub>6</sub>-DMSO) δ 167.8, 141.0, 131.5, 128.7, 127.5, 20.9.

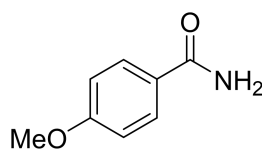

**4-Methoxybenzamide (2c).**<sup>17</sup> Prepared according to the general procedure using 0.0364 g of **1c** (0.2 mmol), and **2c** was obtained as a white solid (0.0269 g, 89% yield) after flash column chromatography. <sup>1</sup>H NMR (500 MHz, CDCl<sub>3</sub>) δ 7.78 (d, *J* = 8.7 Hz, 2H), 6.94 (d, *J* = 8.7 Hz, 2H), 5.85 (bs, 2H), 3.86 (s, 3H); <sup>13</sup>C NMR (125 MHz, d<sub>6</sub>-DMSO) δ 167.5, 161.5, 129.3, 126.4, 113.3, 55.3.

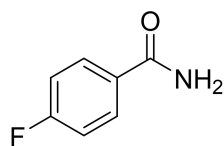

**4-Fluorobenzamide (2d).**<sup>17</sup> Prepared according to the general procedure using 0.0342 g of **1d** (0.2 mmol), and **2d** was obtained as a white solid (0.0257 g, 91% yield) after flash column chromatography. <sup>1</sup>H NMR (500 MHz, d<sub>6</sub>-DMSO) δ 8.01 (br, 1H), 7.98-7.94 (m, 2H), 7.41 (br,

<sup>16</sup> Ramón, R. S.; Bosson, J.; Díez-González, S.; Marion, N.; Nolan, S. P. *J. Org. Chem.* **2010**, *75*, 1197.

<sup>17</sup> Nielsen, D. U.; Taaning, R. H.; Lindhardt, A. T.; Gøgsig, T. M.; Skrydstrup, T. *Org. Lett.* **2011**, *13*, 4454.

1H), 7.31-7.26 (m, 2H); <sup>13</sup>C NMR (125 MHz, d<sub>6</sub>-DMSO) δ 166.8, 163.9 (d, *J* = 248.3 Hz), 130.7 (d, *J* = 2.9 Hz), 130.1 (d, *J* = 9.0 Hz), 115.0 (d, *J* = 21.7 Hz).

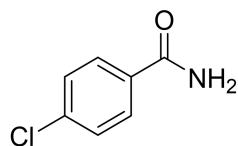

**4-Chlorobenzamide (2e).**<sup>17</sup> Prepared according to the general procedure using 0.0368 g of **1e** (0.2 mmol), and **2e** was obtained as a white solid (0.0268 g, 87% yield) after flash column chromatography. <sup>1</sup>H NMR (500 MHz, d<sub>6</sub>-DMSO) δ 8.04 (br, 1H), 7.90 (d, *J* = 8.5 Hz, 2H), 7.53 (d, *J* = 8.4 Hz, 2H), 7.45 (br, 1H); <sup>13</sup>C NMR (125 MHz; d<sub>6</sub>-DMSO) δ 166.8, 136.1, 133.1, 129.4, 128.2.

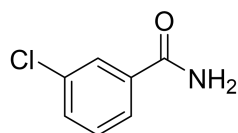

**3-Chlorobenzamide (2f).**<sup>18</sup> Prepared according to the general procedure using 0.0344 g of **1f** (0.2 mmol), and **2f** was obtained as a white solid (0.0265 g, 85% yield) after flash column chromatography. <sup>1</sup>H NMR (500 MHz, CDCl<sub>3</sub>) δ 7.82 (t, *J* = 1.8 Hz, 1H), 7.68 (dt, *J* = 7.8, 1.3 Hz, 1H), 7.50 (dq, *J* = 8.0, 1.0 Hz, 1H), 7.39 (t, *J* = 7.9 Hz, 1H), 6.18 (br, 2H); <sup>13</sup>C NMR (125 MHz; CDCl<sub>3</sub>) δ 168.2, 135.2, 134.9, 132.1, 123.0, 127.8, 125.5.

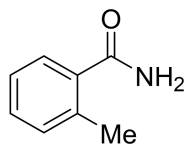

**2-Methylbenzamide (2g).**<sup>18</sup> Prepared according to the general procedure using 0.0334 g of **1g** (0.2 mmol), and **2g** was obtained as a white solid (0.0251 g, 92% yield) after flash column chromatography. <sup>1</sup>H NMR (300 MHz, d<sub>6</sub>-DMSO) δ 7.69 (br, 1H), 7.37-7.28 (m, 3H), 7.23-7.18 (m, 2H), 2.37 (s, 3H); <sup>13</sup>C NMR (125 MHz, d<sub>6</sub>-DMSO) δ 171.0, 137.0, 135.1, 130.4, 129.1, 127.0, 125.4, 19.5.

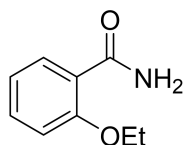

<sup>18</sup> Molander, G. A.; Cavalcanti, L. N. *J. Org. Chem.* **2011**, *76*, 7195.

**2-Ethoxybenzamide (2h).**<sup>19</sup> Prepared according to the general procedure using 0.0393 g of **1h** (0.2 mmol), and **2h** was obtained as a white solid (0.0318 g, 96% yield) after flash column chromatography. <sup>1</sup>H NMR (500 MHz, CDCl<sub>3</sub>) δ 8.22 (dd, *J* = 7.8, 1.8 Hz, 1H), 7.88 (br, 1H), 7.45 (dt, *J* = 8.4, 1.8 Hz, 1H), 7.06 (t, *J* = 7.5 Hz, 1H), 6.96 (d, *J* = 8.3 Hz, 1H), 6.49 (br, 1H), 4.20 (q, *J* = 7.0 Hz, 2H), 1.51 (t, *J* = 7.0 Hz, 3H); <sup>13</sup>C NMR (125 MHz, CDCl<sub>3</sub>) δ 167.4, 157.3, 133.3, 132.5, 121.1, 120.9, 112.3, 64.7, 14.8.

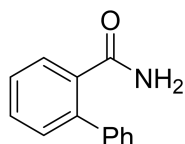

**[1,1'-Biphenyl]-2-carboxamide (2i).**<sup>20</sup> Prepared according to the general procedure using 0.0450 g of **1i** (0.2 mmol), and **2i** was obtained as a white solid (0.0359 g, 92% yield) after flash column chromatography. <sup>1</sup>H NMR (500 MHz, CDCl<sub>3</sub>) δ 7.75 (dd, *J* = 7.7, 1.1 Hz, 1H), 7.49 (dt, *J* = 7.5, 1.4 Hz, 1H), 7.45-7.34 (m, 7H), 5.92 (br, 1H), 5.31 (br, 1H); <sup>13</sup>C NMR (125 MHz, CDCl<sub>3</sub>) δ 171.4, 140.2, 139.9, 134.4, 130.5, 130.4, 129.1, 128.8, 128.7, 127.9, 127.6.

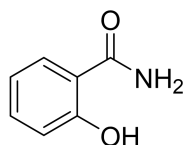

**2-Hydroxybenzamide (2j).**<sup>21</sup> Prepared according to the general procedure using 0.0300 g of **1j** (0.2 mmol), and **2j** was obtained as a white solid (0.0216 g, 73% yield) after flash column chromatography. <sup>1</sup>H NMR (500 MHz, d<sub>6</sub>-DMSO) δ 13.02 (br, 1H), 8.39 (br, 1H), 7.88 (br, 1H), 7.85 (d, *J* = 7.9 Hz, 1H), 7.40 (dd, *J* = 11.3, 4.1 Hz, 1H), 6.87 (dd, *J* = 14.6, 7.8 Hz, 2H); <sup>13</sup>C NMR (125 MHz, d<sub>6</sub>-DMSO) δ 172.1, 161.1, 134.0, 128.1, 118.3, 117.4, 114.4.

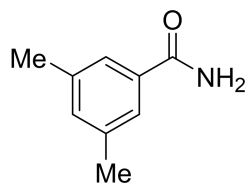

**3,5-Dimethylbenzamide (2k).**<sup>22</sup> Prepared according to the general procedure using 0.0352 g of **1k** (0.2 mmol), and **2k** was obtained as a white solid (0.0243 g, 83% yield) after flash column

<sup>19</sup> Schade, M. A.; Manolikakes, G.; Knochel, P. *Org. Lett.* **2010**, *12*, 3648.

<sup>20</sup> Lauwagie, S.; Millet, R.; Pommery, J.; Depreux, P.; Hénichart, J.-P. *Heterocycles*. **2006**, *68*, 1149.

<sup>21</sup> Owston, N. A.; Parker, A. J.; Williams, M. J. *Org. Lett.* **2007**, *9*, 3599.

<sup>22</sup> Al-Huniti, M. H.; Rivera-Chávez, J.; Colón, K. L.; Stanley, J. L.; Burdette, J. E.; Pearce, C. J.; Oberlies, N. H.; Croatt, M. P. *Org. Lett.* **2018**, *20*, 6046.



chromatography.  $^1\text{H}$  NMR (500 MHz,  $\text{CDCl}_3$ )  $\delta$  7.42 (s, 2H), 7.15 (s, 1H), 6.24 (br, 2H), 2.35 (s, 6H);  $^{13}\text{C}$  NMR (125 MHz,  $\text{CDCl}_3$ )  $\delta$  170.1, 138.3, 133.5, 125.1, 125.1, 21.2 .

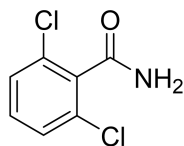

**2,6-Dichlorobenzamide (2l).**<sup>20</sup> Prepared according to the general procedure using 0.0439 g of **1l** (0.2 mmol), and **2l** was obtained as a white solid (0.0263 g, 69% yield) after flash column chromatography.  $^1\text{H}$  NMR (500 MHz,  $d_6$ -DMSO)  $\delta$  8.08 (bs, 1H), 7.81 (bs, 1H), 7.48 (d,  $J = 7.9$  Hz, 2H), 7.42-7.38 (m, 1H);  $^{13}\text{C}$  NMR (125 MHz,  $d_6$ -DMSO)  $\delta$  165.3, 137.0, 130.7, 130.6, 128.0.

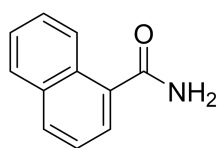

**1-Naphthamide (2m).**<sup>23</sup> Prepared according to the general procedure using 0.0401 g of **1m** (0.2 mmol), and **2m** was obtained as a white solid (0.0301 g, 88% yield) after flash column chromatography.  $^1\text{H}$  NMR (500 MHz,  $d_6$ -DMSO)  $\delta$  8.31 (d,  $J = 8.5$  Hz, 1H), 8.01-7.96 (m, 3H), 7.65-7.52 (m, 5H);  $^{13}\text{C}$  NMR (125 MHz,  $d_6$ -DMSO)  $\delta$  170.6, 134.5, 133.2, 129.7, 129.7, 128.1, 126.6, 126.1, 125.6, 125.1, 124.9.

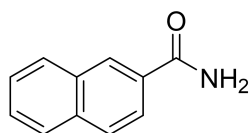

**2-Naphthamide (2n).**<sup>23</sup> Prepared according to the general procedure using 0.0398 g of **1n** (0.2 mmol), and **2n** was obtained as a white solid (0.0258 g, 76% yield) after flash column chromatography.  $^1\text{H}$  NMR (500 MHz,  $d_6$ -DMSO)  $\delta$  8.52 (s, 1H), 8.15 (br, 1H), 8.03-7.97 (m, 4H), 7.63-7.58 (m, 2H), 7.48 (s, 1H);  $^{13}\text{C}$  NMR (125 MHz,  $d_6$ -DMSO)  $\delta$  168.0, 134.2, 132.1, 131.7, 128.8, 127.8, 127.7, 127.6, 127.5, 126.6, 124.4.

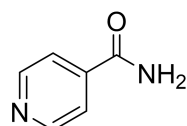

**Isonicotinamide (2o).**<sup>24</sup> Prepared according to the general procedure using 0.0308 g of **1o**

<sup>23</sup> Hanada, S.; Motoyama, Y.; Nagashima, H. *Eur. J. Org. Chem.* **2008**, 4097.

<sup>24</sup> Abu-Youssef, M. A. M.; Dey, R.; Gohar, Y.; Massoud, A. A.; Öhrström, L.; Langer, V. *Inorg. Chem.* **2007**, *46*, 5893.

(0.2 mmol), and **2o** was obtained as a white solid (0.0081 g, 33% yield) after flash column chromatography.  $^1\text{H NMR}$  (500 MHz,  $\text{DMSO-}d_6$ )  $\delta$  8.72 (d,  $J = 6.1$  Hz, 2H), 8.25 (br s, 1H), 7.72 (d,  $J = 6.1$  Hz, 2H), 7.73 (br s, 1H);  $^{13}\text{C NMR}$  (126 MHz,  $\text{DMSO-}d_6$ )  $\delta$  166.3, 150.2, 141.2, 121.4.

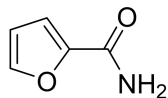

**Furan-2-carboxamide (2p)**.<sup>22</sup> Prepared according to the general procedure using 0.0282 g of **1o** (0.2 mmol), and **2o** was obtained as a white solid (0.0187 g, 84% yield) after flash column chromatography.  $^1\text{H NMR}$  (500 MHz,  $d_6$ -DMSO) 7.81 (s, 1H), 7.77 (bs, 1H), 7.38 (bs, 1H), 7.10 (d,  $J = 3.4$  Hz, 1H), 6.61-6.60 (m, 1H);  $^{13}\text{C NMR}$  (125 MHz,  $d_6$ -DMSO)  $\delta$  159.4, 148.0, 145.0, 113.6, 111.7.

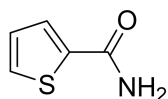

**Thiophene-2-carboxamide (2q)**.<sup>20</sup> Prepared according to the general procedure using 0.0313 g of **1p** (0.2 mmol), and **2p** was obtained as a white solid (0.0251 g, 99% yield) after flash column chromatography.  $^1\text{H NMR}$  (500 MHz,  $d_6$ -DMSO)  $\delta$  7.95 (br, 1H), 7.74 (dd,  $J = 9.7, 4.2$  Hz, 2H), 7.36 (br, 1H), 7.13 (t,  $J = 4.2$  Hz, 1H);  $^{13}\text{C NMR}$  (125 MHz,  $d_6$ -DMSO)  $\delta$  162.9, 140.3, 130.9, 128.6, 127.8.

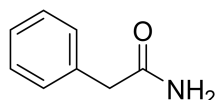

**2-Phenylacetamide (2r)**.<sup>24</sup> Prepared according to the general procedure using 0.0331 g of **1q** (0.2 mmol), and **2q** was obtained as a white solid (0.0225 g, 83% yield) after flash column chromatography.  $^1\text{H NMR}$  (500 MHz;  $\text{CDCl}_3$ )  $\delta$  7.37-7.34 (m, 2H), 7.31-7.26 (m, 3H), 5.90 (br, 1H), 5.44 (br, 1H), 3.57 (s, 2H);  $^{13}\text{C NMR}$  (125 MHz;  $\text{CDCl}_3$ )  $\delta$  173.7, 134.9, 129.4, 129.1, 127.4, 43.3.

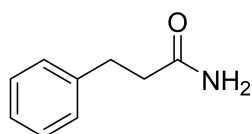

**3-Phenylpropanamide (2s)**.<sup>23</sup> Prepared according to the general procedure using 0.0351 g of **1r** (0.2 mmol), and **2r** was obtained as a white solid (0.0244 g, 84% yield) after flash column chromatography.  $^1\text{H NMR}$  (500 MHz,  $\text{CDCl}_3$ )  $\delta$  7.30-7.26 (m, 2H), 7.21-7.17 (m, 3H), 5.84 (br,

1H), 5.50 (br, 1H), 2.95 (t,  $J = 7.8$  Hz, 3H), 2.52 (t,  $J = 7.8$  Hz, 3H);  $^{13}\text{C}$  NMR (125 MHz,  $\text{CDCl}_3$ )  $\delta$  174.8 140.7, 128.6, 128.3, 126.3, 37.5, 31.4.

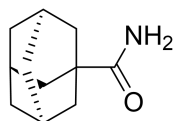

**Adamantane-1-carboxamide (2t).**<sup>23</sup> Prepared according to the general procedure using 0.0421 g of **1s** (0.2 mmol), and **2s** was obtained as a white solid (0.0289 g, 80% yield) after flash column chromatography.  $^1\text{H}$  NMR (500 MHz,  $\text{CDCl}_3$ )  $\delta$  5.79 (br, 1H), 5.64 (br, 1H), 2.05 (d,  $J = 2.5$  Hz, 3H), 1.88 (t,  $J = 4.4$  Hz, 6H), 1.73 (q,  $J = 12.3$  Hz, 6H);  $^{13}\text{C}$  NMR (125 MHz,  $\text{CDCl}_3$ )  $\delta$  181.0, 40.6, 39.3, 36.5, 28.1.

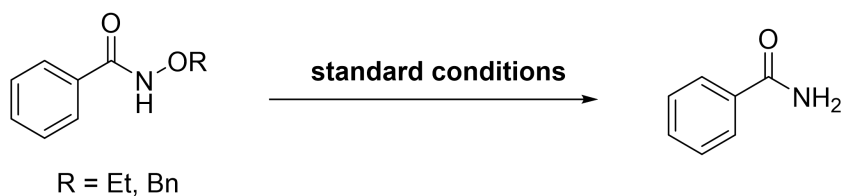

Prepared according to the general procedure using 0.0330 g of **1u** (0.2 mmol), and **2u** was obtained as a white solid (0.0221 g, 91% yield) after flash column chromatography. NMR data is consistent with **2a**.

Prepared according to the general procedure using 0.0456 g of **1v** (0.2 mmol), **2v** was obtained as a white solid (0.0214 g, 88% yield) after flash column chromatography. NMR data is consistent with **2a**.

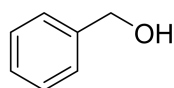

**Phenylmethanol (2v').**<sup>25</sup> Colorless oil, 67% yield (0.0154 g, 0.14 mmol).  $^1\text{H}$  NMR (400 MHz,  $\text{CDCl}_3$ )  $\delta$  7.41-7.26 (m, 5H), 4.68 (s, 2H), 1.82 (br s, 1H);  $^{13}\text{C}$  NMR (101 MHz,  $\text{CDCl}_3$ )  $\delta$  140.9, 128.6, 127.7, 127.0, 65.4.

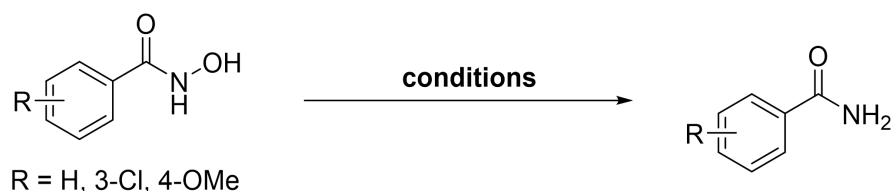

Prepared according to the general procedure using 0.0270 g of **1w** (0.2 mmol), and the molar ratio of  $\text{HCOOH}/\text{Et}_3\text{N}$  is 5/2. The desired product **2w** was obtained as a white solid (0.0198 g, 83%

<sup>25</sup> Cano, R.; Yus, M.; Ramón, D. J. *Tetrahedron* **2011**, *67*, 8079.

yield) after flash column chromatography. NMR data is consistent with **2a**.

Prepared according to the general procedure using 0.0344 g of **1x** (0.2 mmol), and the molar ratio of HCOOH/Et<sub>3</sub>N is 5/2. The desired product **2x** was obtained as a white solid (0.0252 g, 82% yield) after flash column chromatography. NMR data is consistent with **2f**.

Prepared according to the general procedure using 0.0332 g of **1y** (0.2 mmol), and the molar ratio of HCOOH/Et<sub>3</sub>N is 5/2. The desired product **2y** was obtained as a white solid (0.0235 g, 78% yield) after flash column chromatography. NMR data is consistent with **2c**.

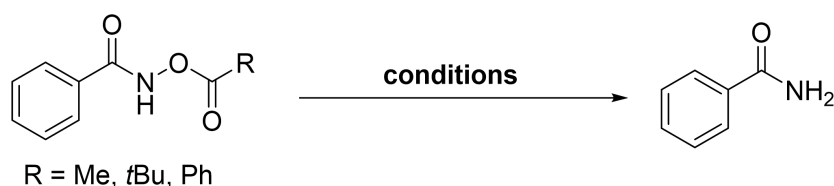

Prepared according to the general procedure using 0.0356 g of **1z** (0.2 mmol), and the molar ratio of HCOOH/Et<sub>3</sub>N is 5/2. The desired product **2z** was obtained as a white solid (0.0155 g, 64% yield) after flash column chromatography. NMR data is consistent with **2a**.

Prepared according to the general procedure using 0.0446 g of **1aa** (0.2 mmol), and the molar ratio of HCOOH/Et<sub>3</sub>N is 5/2. The desired product **2aa** was obtained as a white solid (0.0191 g, 78% yield) after flash column chromatography. NMR data is consistent with **2a**.

Prepared according to the general procedure using 0.0484 g of **1ab** (0.2 mmol), and the molar ratio of HCOOH/Et<sub>3</sub>N is 5/2. The desired product **2ab** was obtained as a white solid (0.0165 g, 68% yield) after flash column chromatography. NMR data is consistent with **2a**.

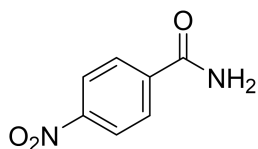

**4-nitrobenzamide (2ac)**.<sup>26</sup> Prepared according to the general procedure using 0.0536 g of **1ac** (0.2 mmol), and **2ac** was obtained as a yellow solid (0.0224 g, 67% yield) after flash column chromatography. <sup>1</sup>H NMR (400 MHz, DMSO-*d*<sub>6</sub>) δ 8.36-8.25 (d, *J* = 8.9 Hz, 3H), 8.11 (d, *J* = 8.7 Hz, 2H), 7.74 (br s, 1H); <sup>13</sup>C NMR (101 MHz, DMSO-*d*<sub>6</sub>) δ 166.7, 149.5, 140.5, 129.4, 123.9.

<sup>26</sup> Li, Y.-T.; Liao, B.-S.; Chen, H.-P.; Liu, S.-T. *Synthesis* **2011**, *16*, 2639.

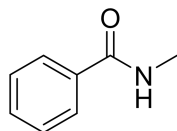

*N*-Methylbenzamide (**2ad**).<sup>27</sup> Prepared according to the general procedure using 0.0351 g of **1ad** (0.2 mmol), and the molar ratio of HCOOH/Et<sub>3</sub>N is 5/2. The desired product **2ad** was obtained as a light yellow solid (0.0171 g, 64% yield) after flash column chromatography. <sup>1</sup>H NMR (500 MHz, CDCl<sub>3</sub>) δ 7.77 (d, *J* = 7.6 Hz, 2H), 7.46 (t, *J* = 7.3 Hz, 1H), 7.39 (t, *J* = 7.5 Hz, 2H), 6.68 (s, 1H), 2.97 (d, *J* = 4.7 Hz, 3H); <sup>13</sup>C NMR (125 MHz, CDCl<sub>3</sub>) δ 168.5, 134.6, 131.3, 128.5, 126.9, 26.8.

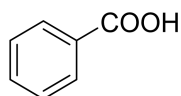

Benzoic acid (**2ae**).<sup>28</sup> Prepared according to the general procedure using 0.0436 g of **1ae** (0.2 mmol), and **2ae** was obtained as a white solid (0.0232 g, 96% yield) after flash column chromatography. <sup>1</sup>H NMR (500 MHz; CDCl<sub>3</sub>) δ 10.89 (br, 1H), 8.13 (d, *J* = 7.6 Hz, 2H), 7.61 (t, *J* = 7.3 Hz, 1H), 7.47 (t, *J* = 7.4 Hz, 2H); <sup>13</sup>C NMR (125 MHz, CDCl<sub>3</sub>) δ 172.3, 133.8, 130.2, 129.4, 128.5.

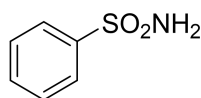

Benzenesulfonamide (**4a**).<sup>29</sup> Prepared according to the general procedure using 0.0373 g of **3a** (0.2 mmol), and **4a** was obtained as a white solid (0.0290 g, 93% yield) after flash column chromatography. <sup>1</sup>H NMR (500 MHz, d<sub>6</sub>-DMSO) δ 7.84-7.82 (m, 2H), 7.62-7.55 (m, 3H), 7.36 (bs, 2H); <sup>13</sup>C NMR (125 MHz, d<sub>6</sub>-DMSO) δ 144.2, 131.7, 128.9, 125.6.

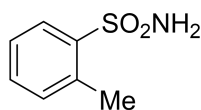

2-Methylbenzenesulfonamide (**4b**).<sup>27</sup> Prepared according to the general procedure using 0.0396 g of **3b** (0.2 mmol), and **4b** was obtained as a white solid (0.0311 g, 92% yield) after flash column chromatography. <sup>1</sup>H NMR (300 MHz, d<sub>6</sub>-DMSO) δ 7.85 (d, *J* = 7.7 Hz, 1H), 7.49-7.46 (m, 1H), 7.37-7.35 (m, 4H), 2.59 (s, 3H); <sup>13</sup>C NMR (125 MHz, d<sub>6</sub>-DMSO) δ 142.1, 135.8, 132.1, 131.8,

<sup>27</sup> Paul, B.; Panja, D.; Kundu, S. *Org. Lett.* **2019**, 21, 5843.

<sup>28</sup> Keshipour, S.; Khezerloo, M. *RSC Adv.* **2019**, 9, 17129.

<sup>29</sup> Tota, A.; John-Campbell, S. S.; Briggs, E. L.; Estévez, G. O.; Afonso, M.; Degennaro, L.; Luisi, R.; Bull, J. A. *Org. Lett.* **2018**, 20, 2599.

127.0, 126.0, 19.8.

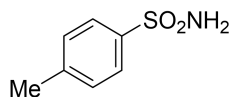

**4-Methylbenzenesulfonamide (4c).**<sup>27</sup> Prepared according to the general procedure using 0.0398 g of **3c** (0.2 mmol), and **4c** was obtained as a white solid (0.0337 g, 99% yield) after flash column chromatography. <sup>1</sup>H NMR (300 MHz, d<sub>6</sub>-DMSO) δ 7.72 (d, *J* = 8.2 Hz, 2H), 7.36 (d, *J* = 8.0 Hz, 2H), 7.27 (br, 2H), 2.37 (s, 3H); <sup>13</sup>C NMR (125 MHz, d<sub>6</sub>-DMSO) δ 141.8, 141.4, 129.3, 125.6, 20.9.

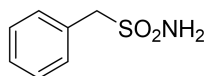

**Phenylmethanesulfonamide (4d).**<sup>30</sup> Prepared according to the general procedure using 0.0404 g of **3d** (0.2 mmol), and **4d** was obtained as a white solid (0.0317 g, 92% yield) after flash column chromatography. <sup>1</sup>H NMR (500 MHz, CDCl<sub>3</sub>) δ 7.42-7.38 (m, 5H), 4.76 (br, 2H), 4.29 (s, 2H); <sup>13</sup>C NMR (125 MHz, CDCl<sub>3</sub>) δ 130.8, 129.4, 128.9, 128.9, 61.0.

#### **IV. Gram-scale Reaction**

To a 100 mL dried Schlenk flask under air, 1.5340 g (10 mmol) of **1a**, 0.1535 g (0.15 mmol) of [RuCl<sub>2</sub>(*p*-cymene)]<sub>2</sub>, 12.5 mL of HCOOH/Et<sub>3</sub>N (molar ratio 1/1) and 12.5 mL of H<sub>2</sub>O were added in sequence. After stirring at 100 °C for 12 hours, the mixture was quenched with saturated NH<sub>4</sub>Cl (10 mL), extracted with EA (50 mL x 3). The combined organic layers were washed with brine, dried over Na<sub>2</sub>SO<sub>4</sub>, filtered and concentrated in vacuo. The residue was purified by flash chromatography on silica gel with PE/EA as the eluent to afford 1.1083 g (9.1 mmol, 91% yield) of **2a**.

<sup>30</sup> Bahrami, K.; Khodaei, M. M.; Soheilzad, M. *J. Org. Chem.* **2009**, *74*, 9287.

## V. NMR Spectra

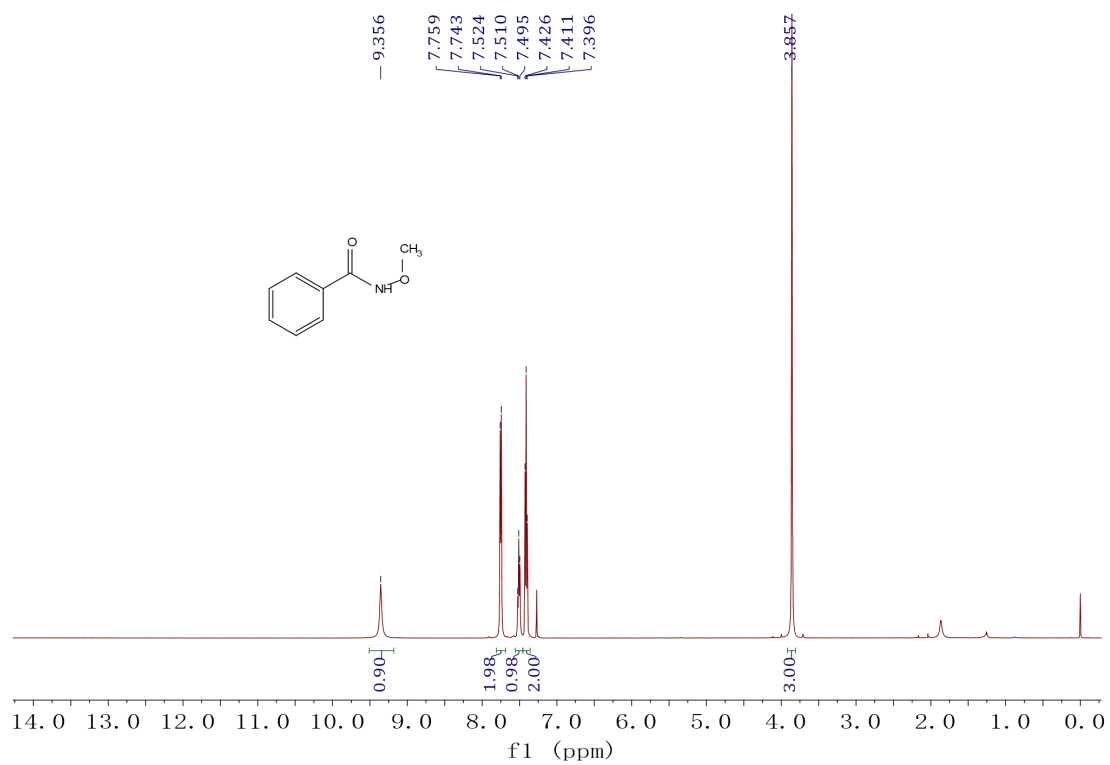

$^1\text{H}$  NMR: *N*-methoxybenzamide (**1a**)

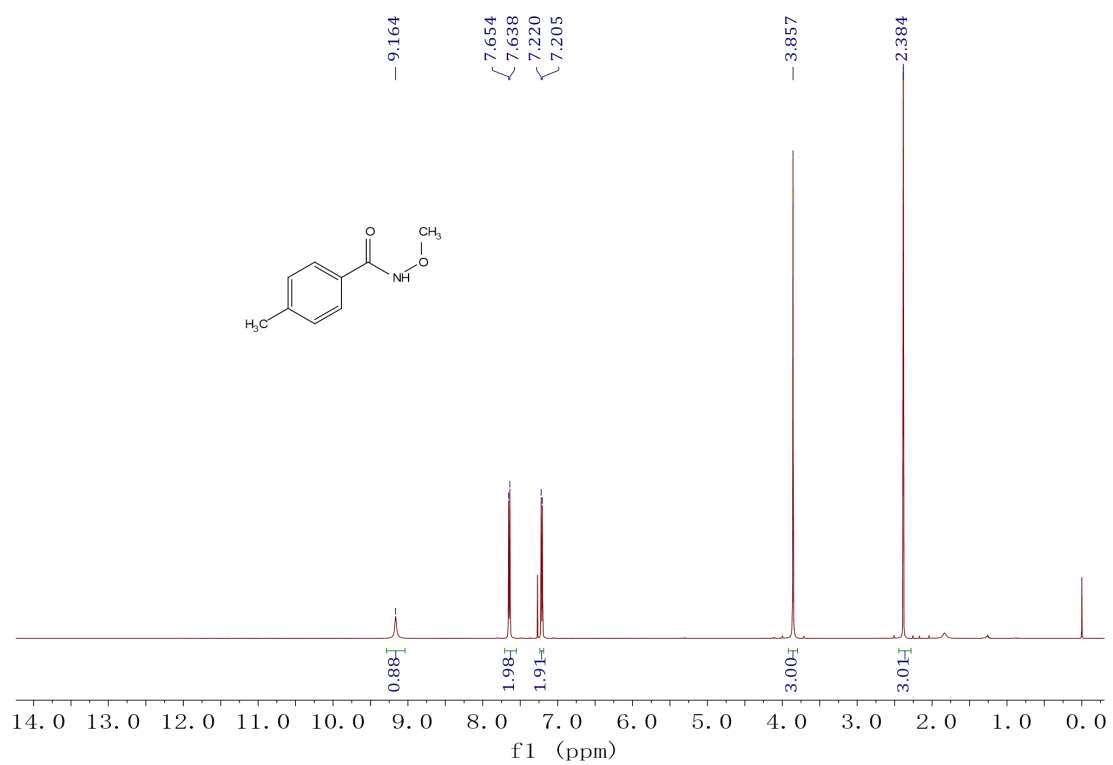

$^1\text{H}$  NMR: *N*-methoxy-4-methylbenzamide (**1b**)

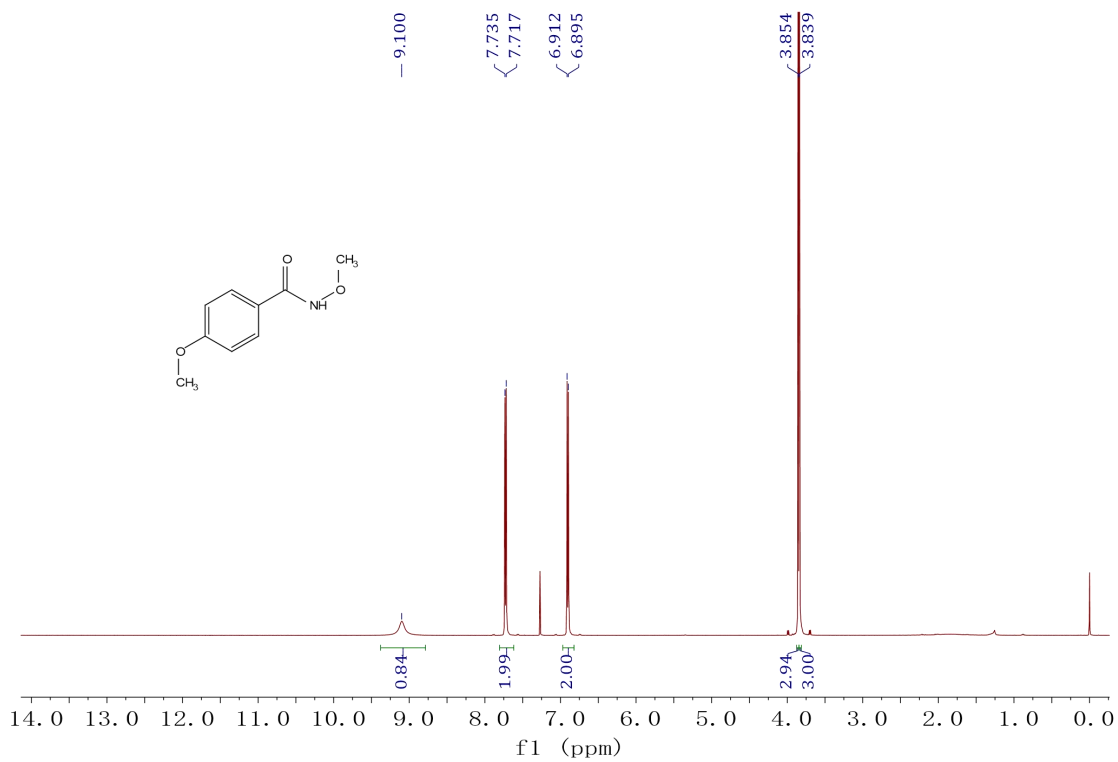

<sup>1</sup>H NMR: *N*,4-dimethoxybenzamide (**1c**)

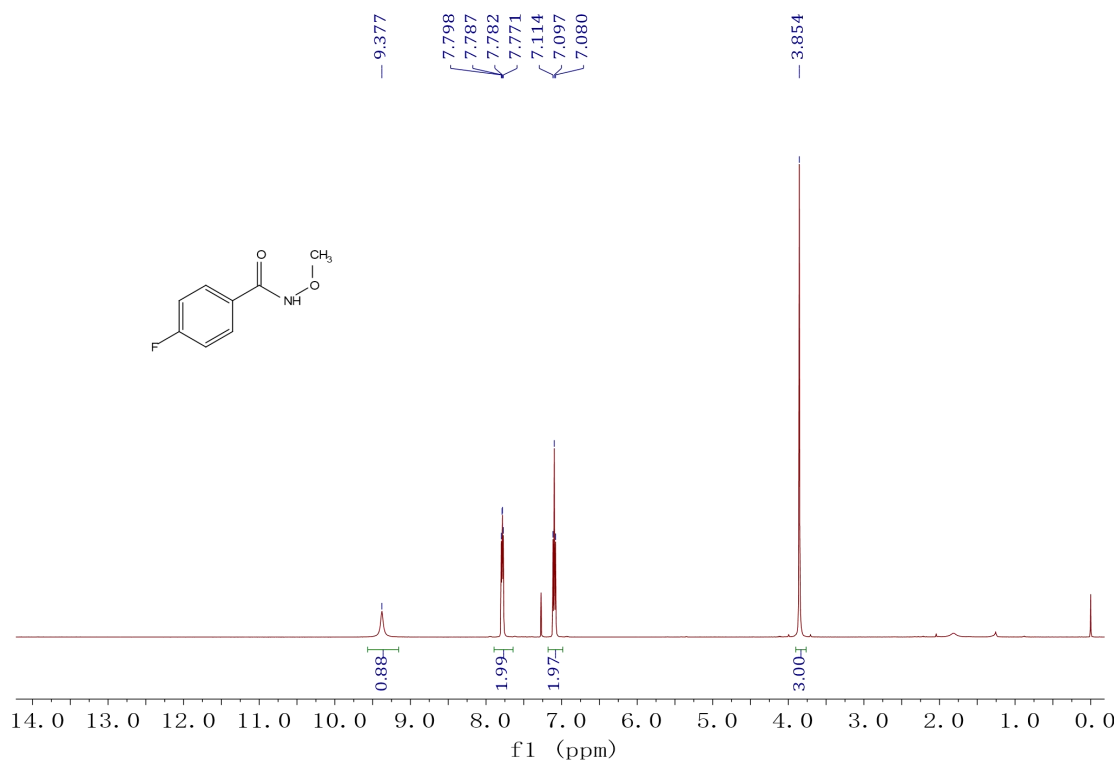

<sup>1</sup>H NMR: 4-fluoro-*N*-methoxybenzamide (**1d**)



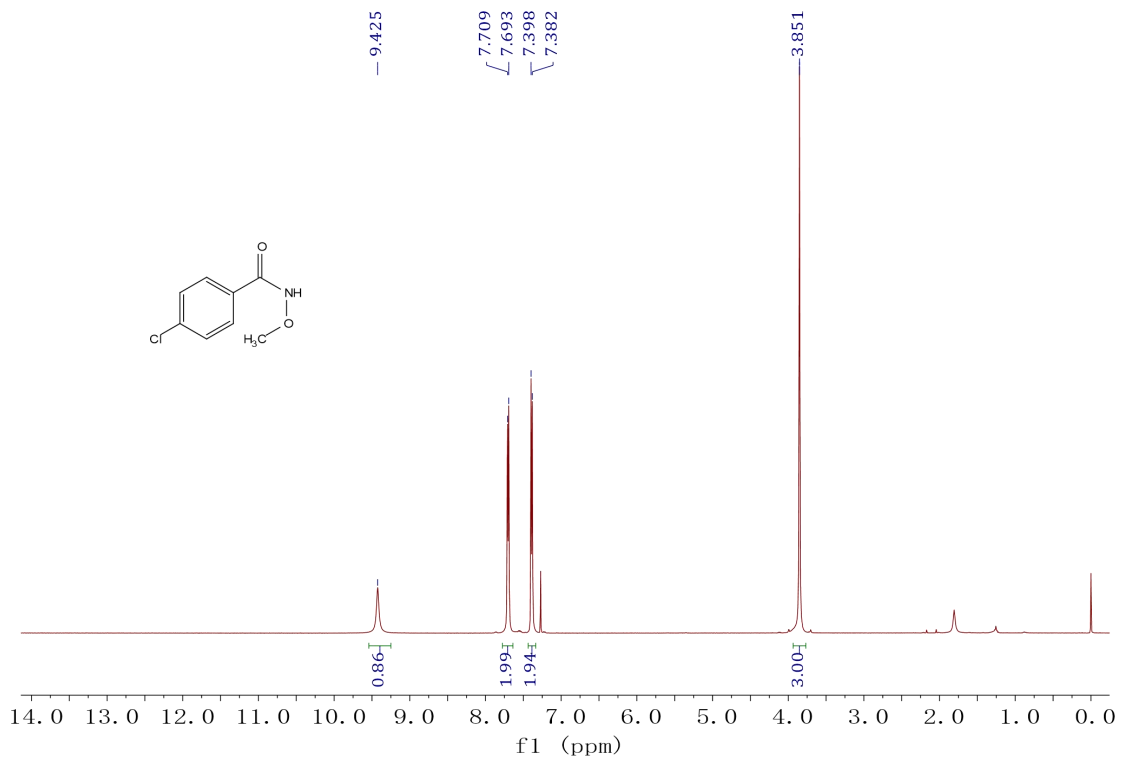

<sup>1</sup>H NMR: 4-chloro-N-methoxybenzamide (1e)

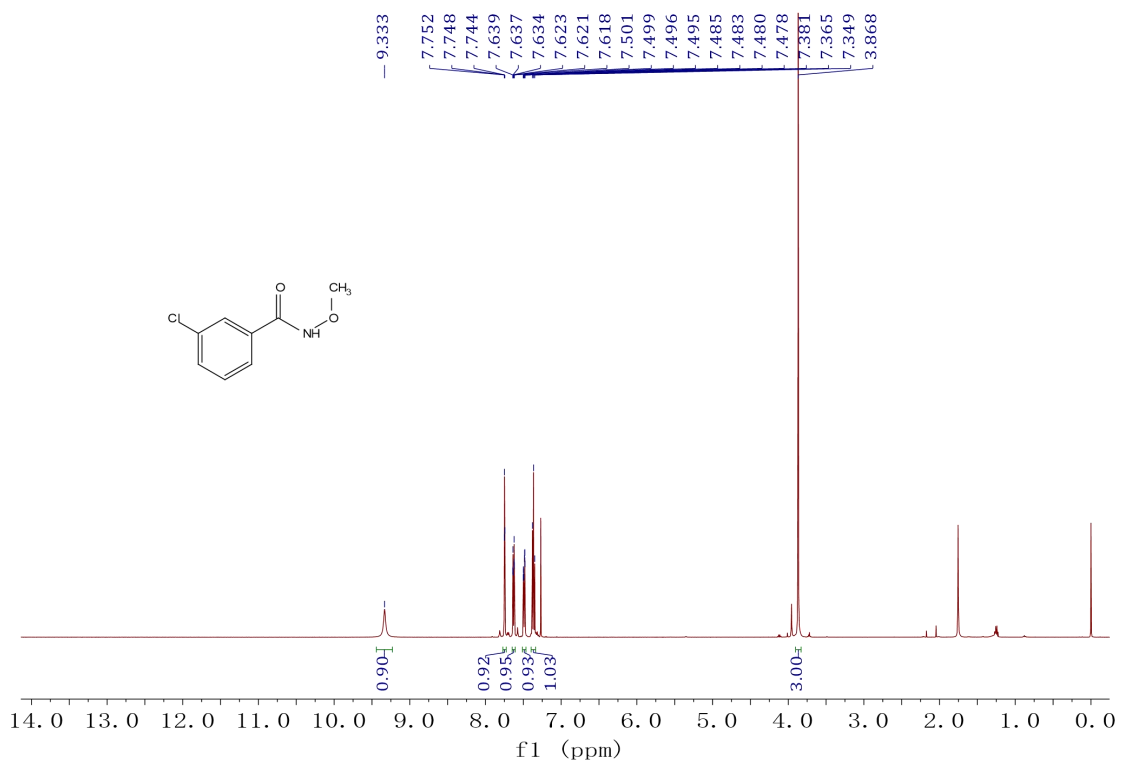

<sup>1</sup>H NMR: 3-chloro-N-methoxybenzamide (1f)

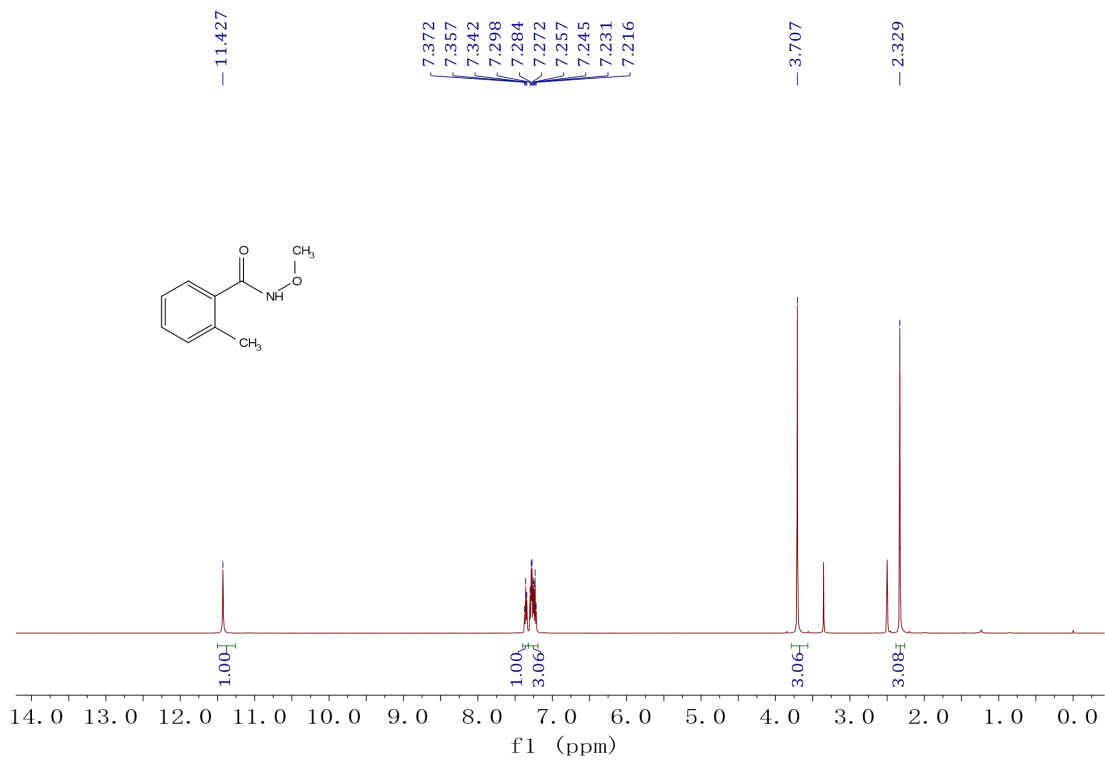

<sup>1</sup>H NMR: *N*-methoxy-2-methylbenzamide (**1g**)

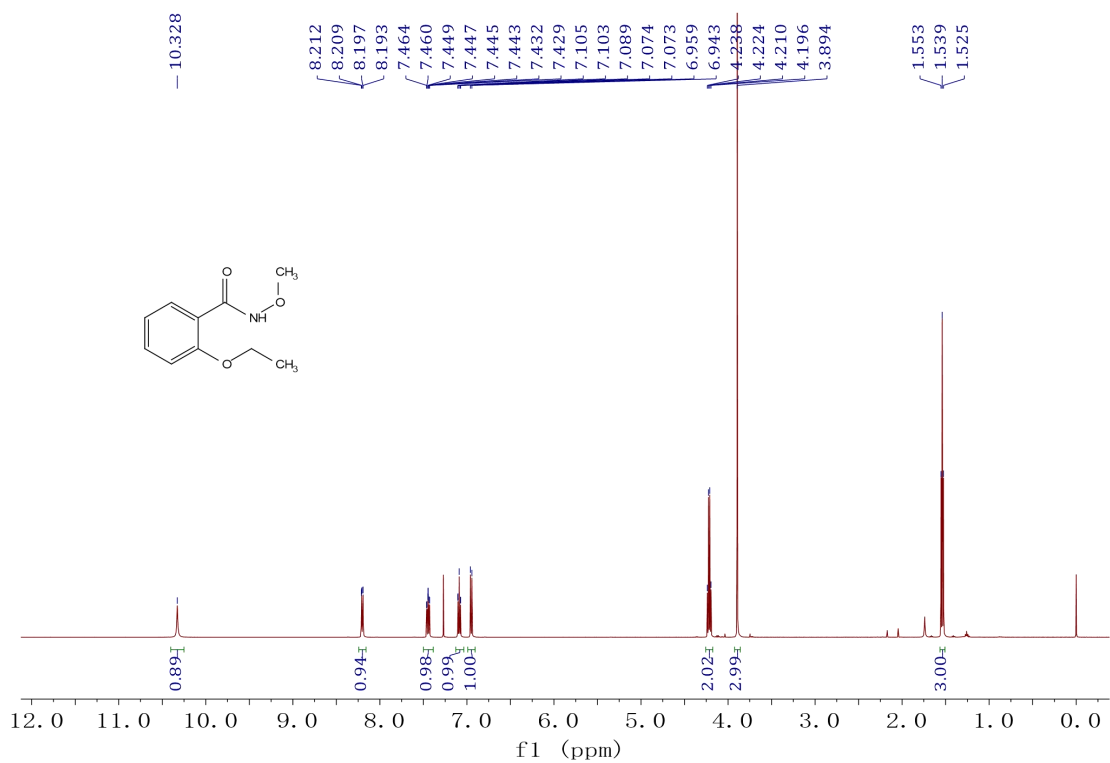

<sup>1</sup>H NMR: 2-ethoxy-*N*-methoxybenzamide (**1h**)

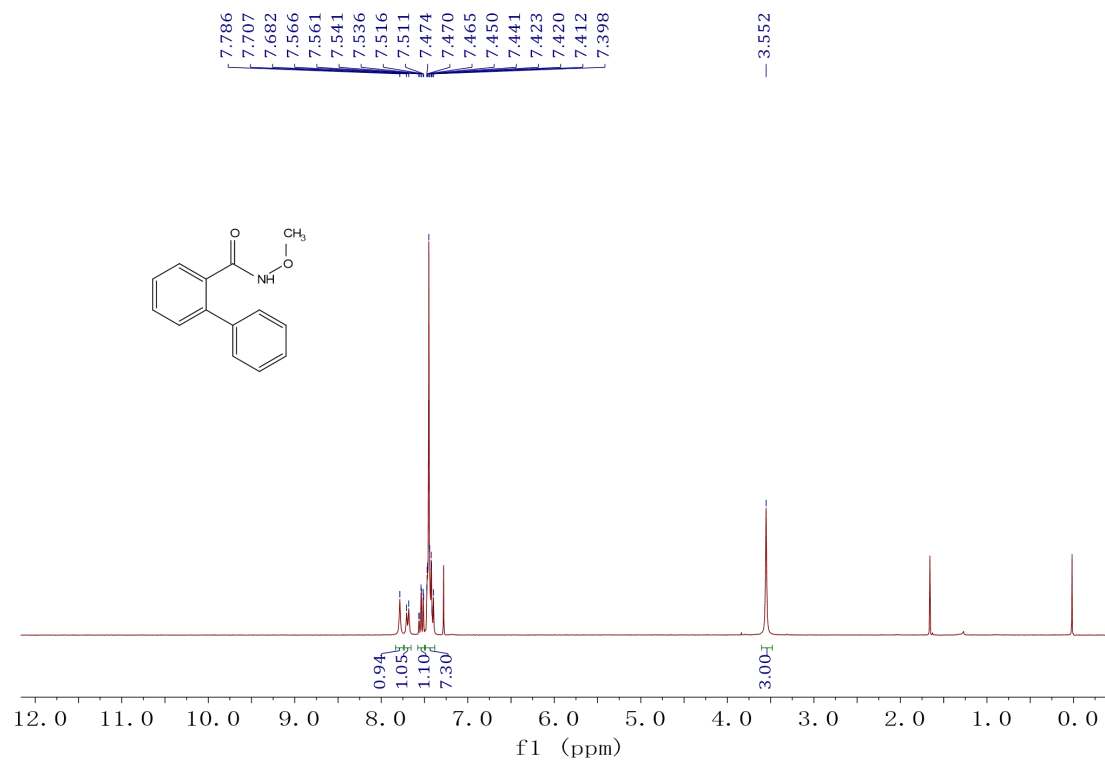

<sup>1</sup>H NMR: *N*-methoxy-[1,1'-biphenyl]-2-carboxamide (**1i**)

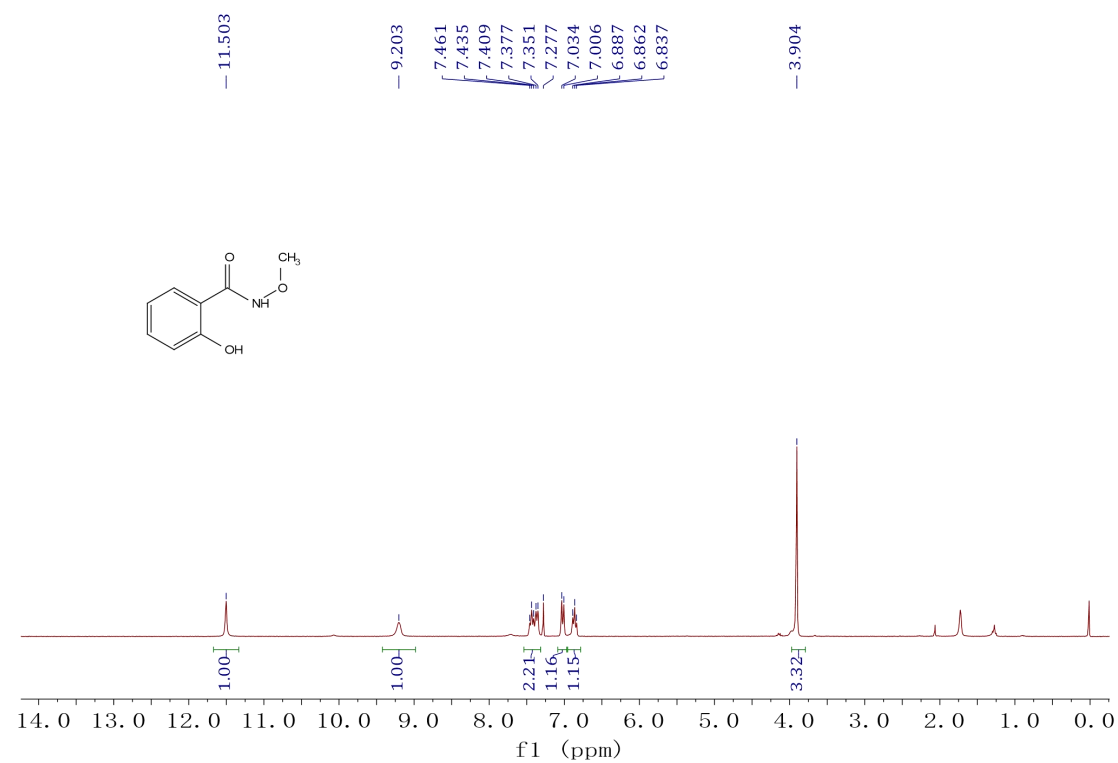

<sup>1</sup>H NMR: 2-hydroxy-*N*-methoxybenzamide (**1j**)

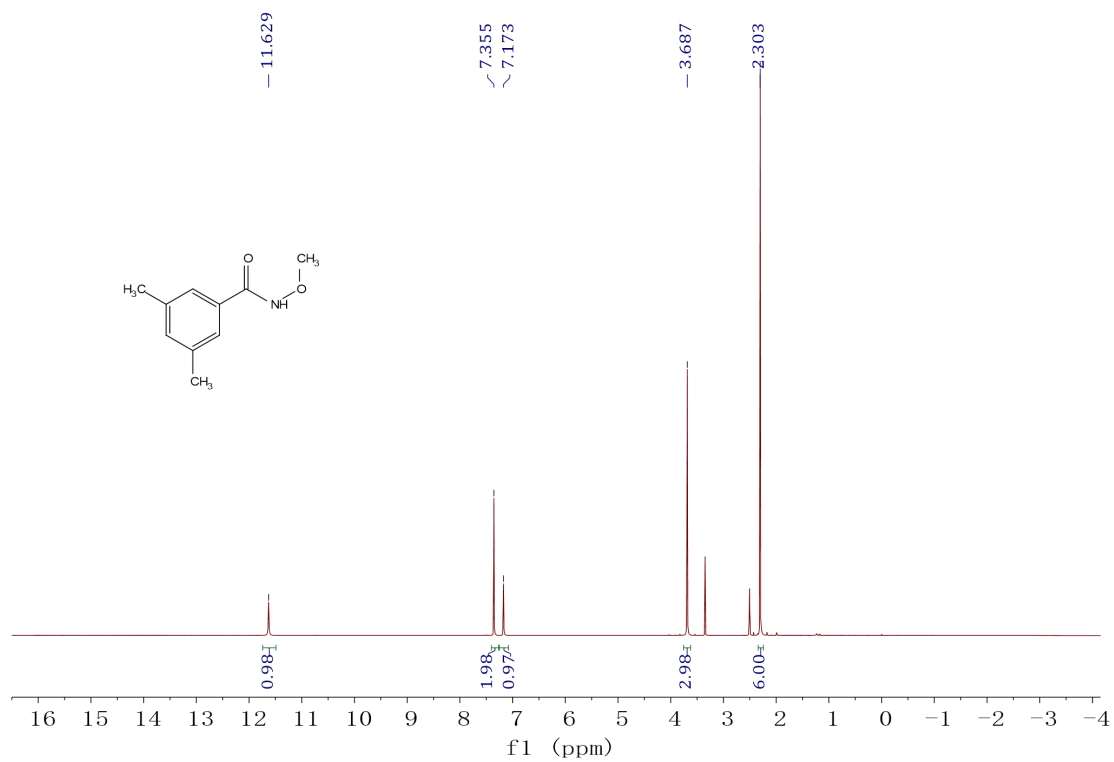

<sup>1</sup>H NMR: *N*-methoxy-3,5-dimethylbenzamide (**1k**)

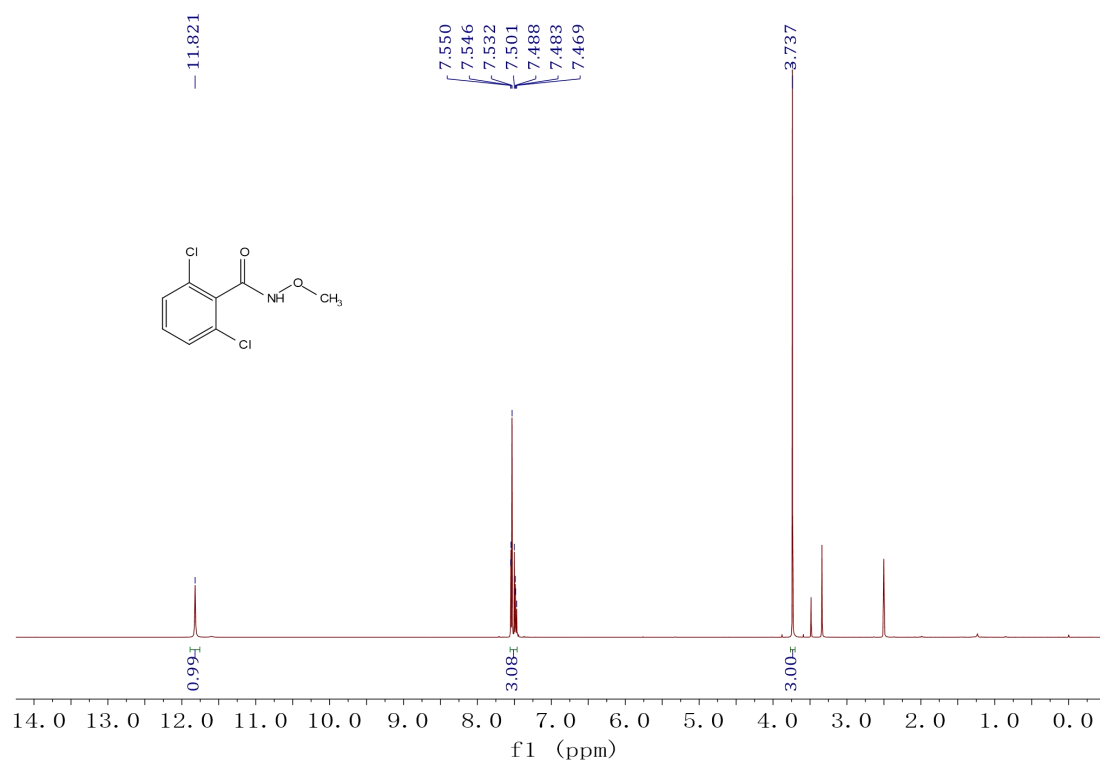

<sup>1</sup>H NMR: 2,6-dichloro-*N*-methoxybenzamide (**1l**)

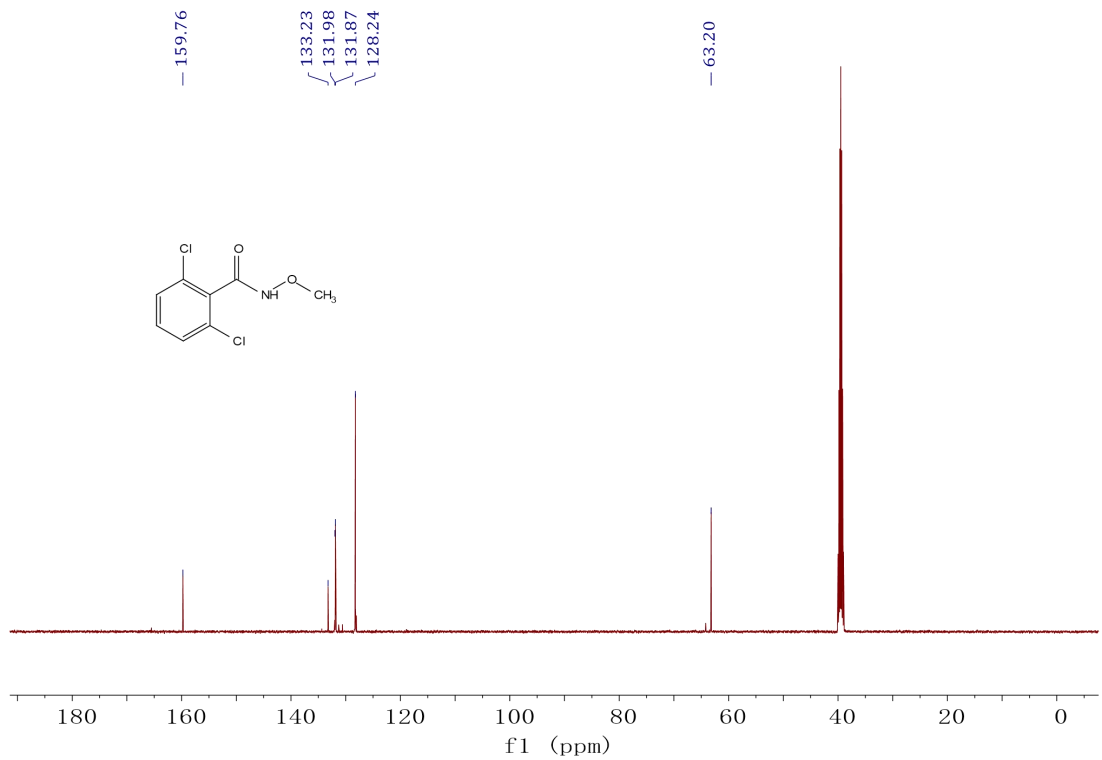

<sup>13</sup>C NMR: 2,6-dichloro-N-methoxybenzamide (**11**)

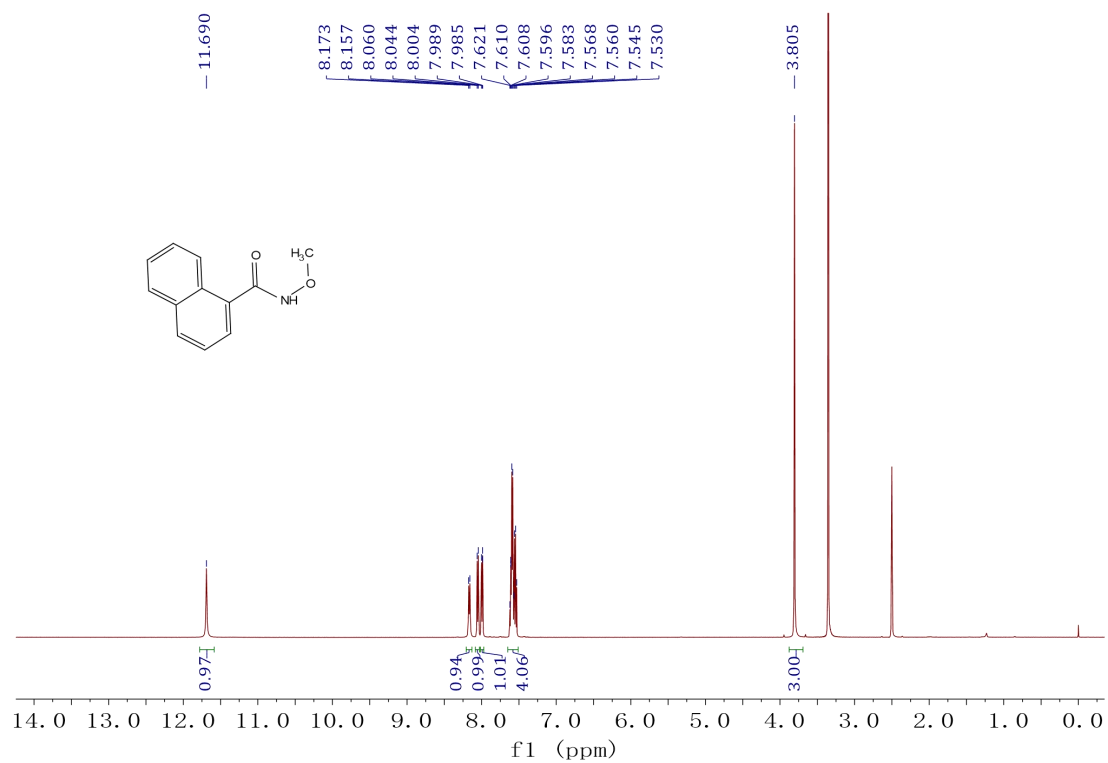

<sup>1</sup>H NMR: N-methoxy-1-naphthamide (**1m**)

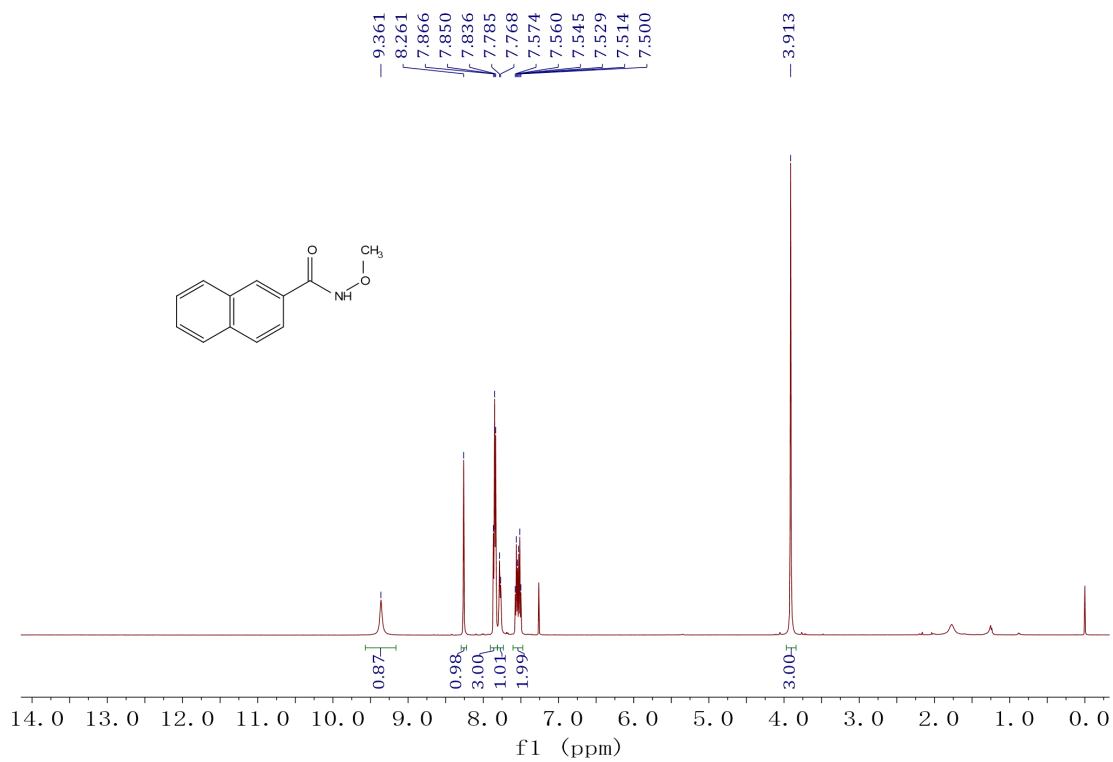

<sup>1</sup>H NMR: *N*-methoxy-2-naphthamide (**1n**)

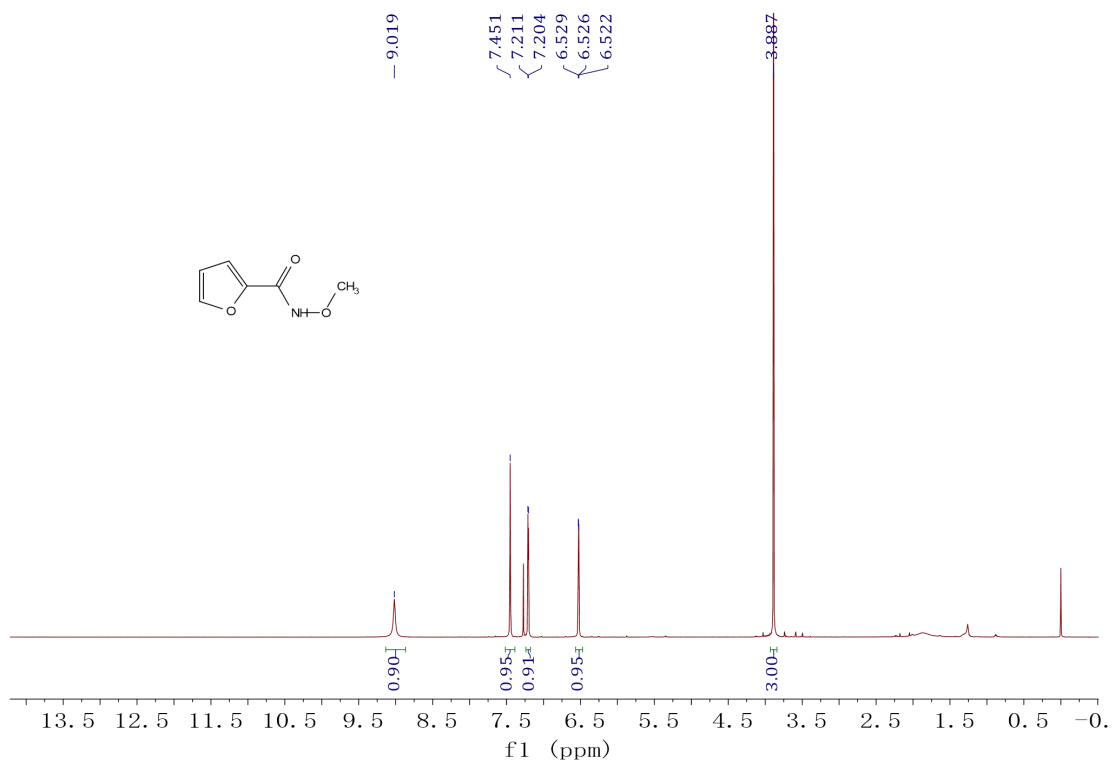

<sup>1</sup>H NMR: *N*-methoxyfuran-2-carboxamide (**1p**)

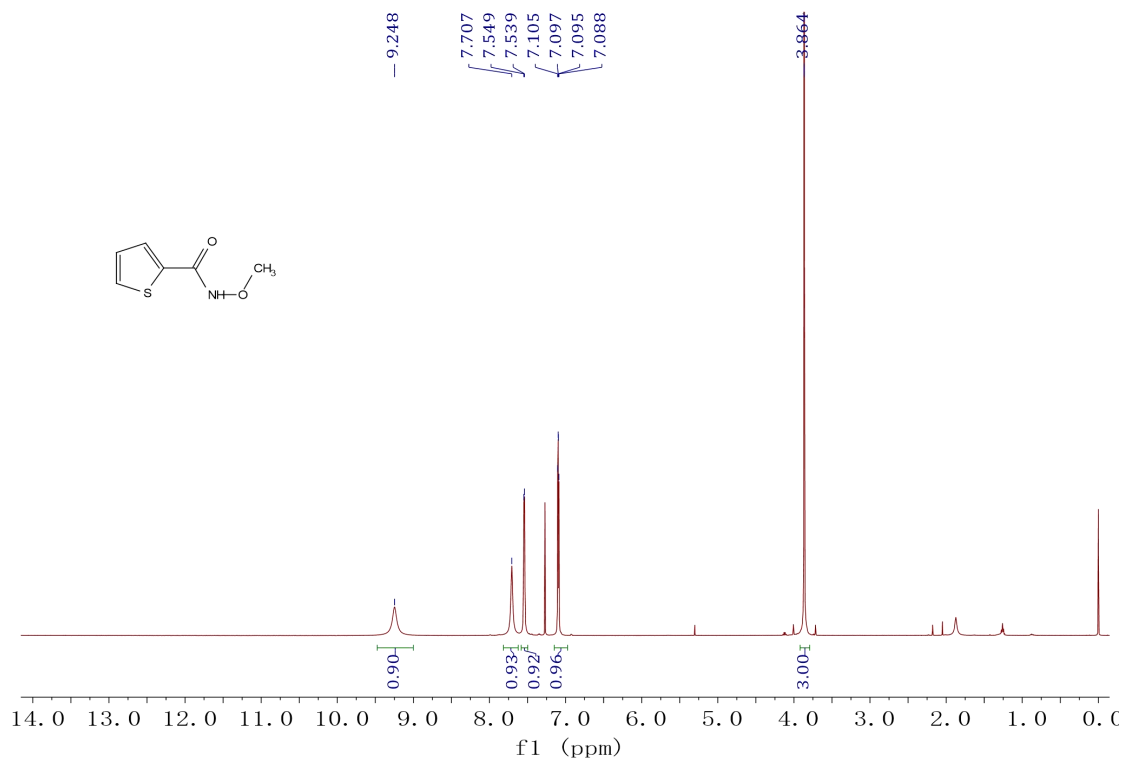

<sup>1</sup>H NMR: *N*-methoxythiophene-2-carboxamide (**1q**)

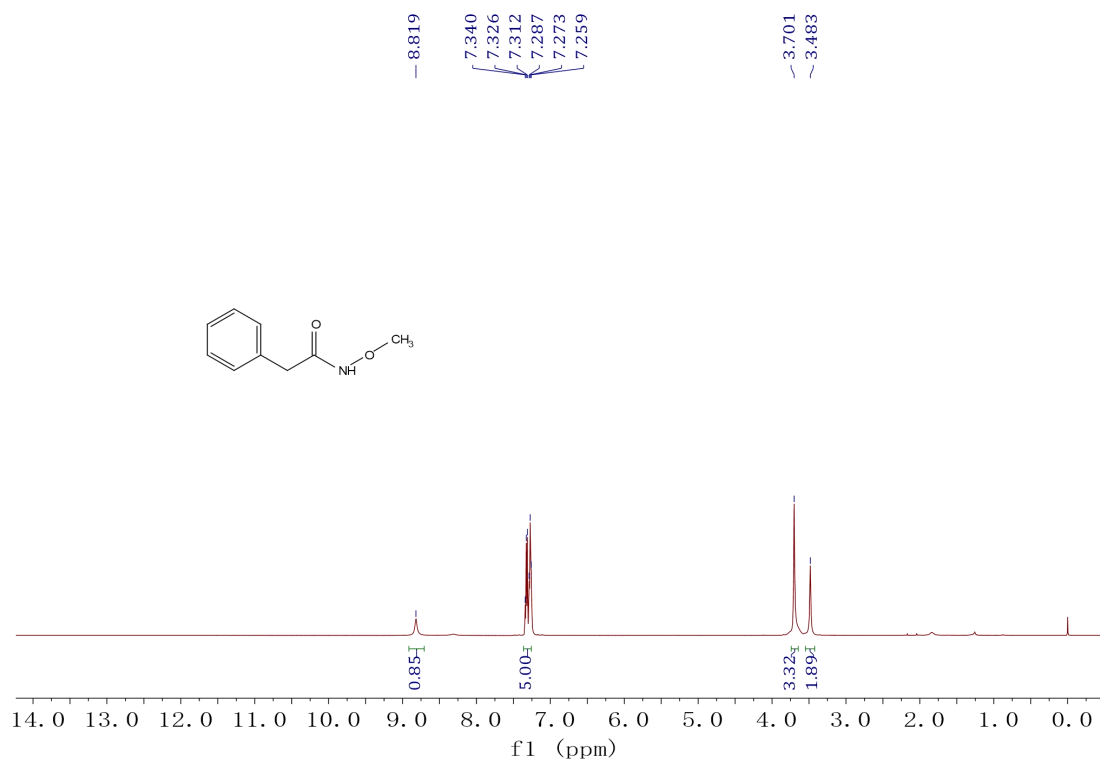

<sup>1</sup>H NMR: *N*-methoxy-2-phenylacetamide (**1r**)

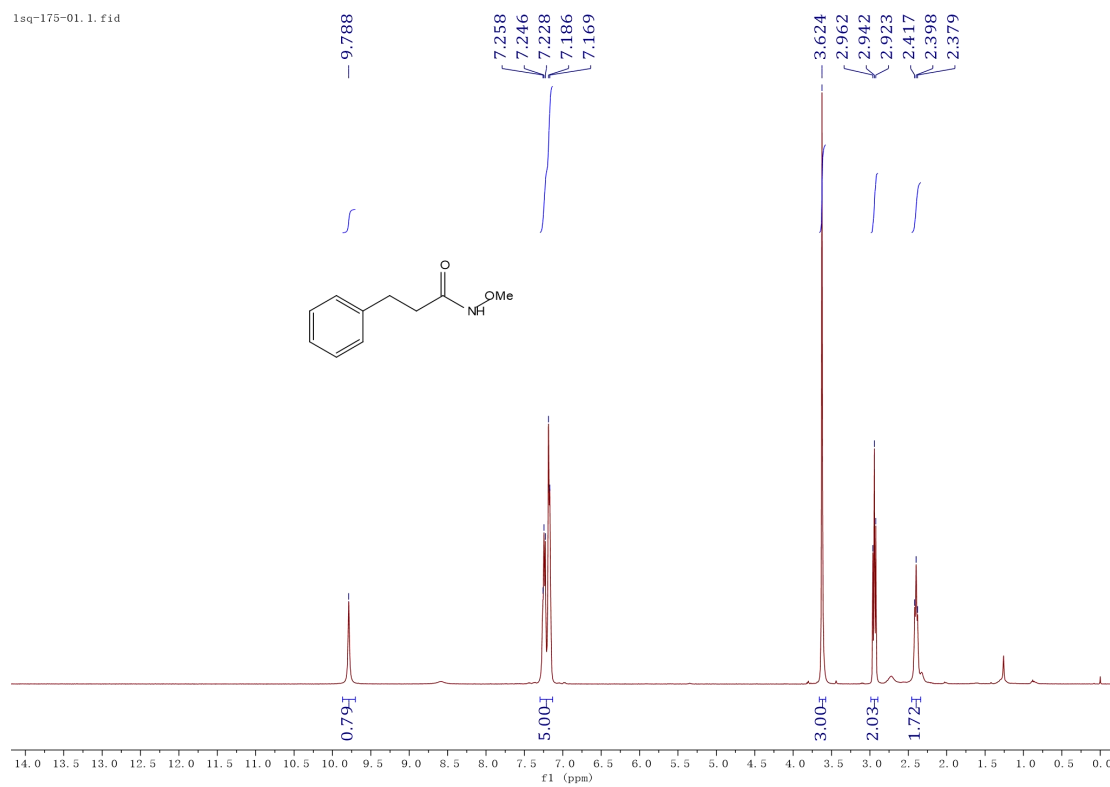

$^1\text{H}$  NMR: *N*-methoxy-3-phenylpropanamide (**1s**)

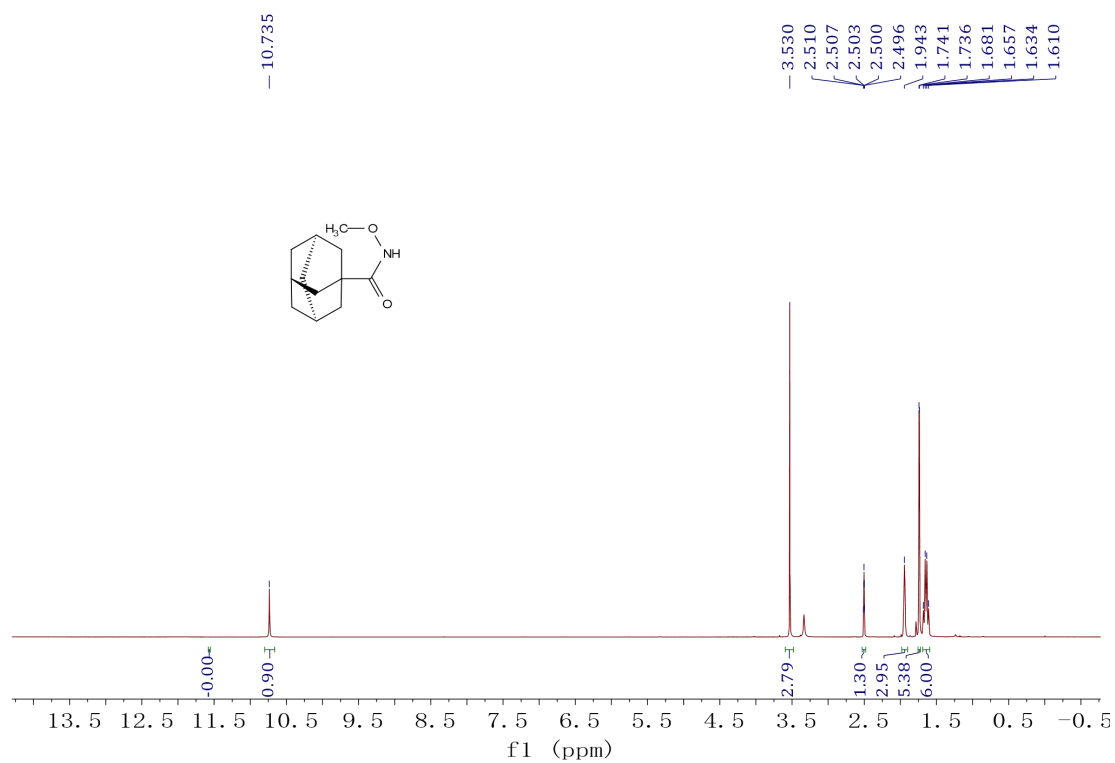

$^1\text{H}$  NMR: *(3r,5r,7r)*-*N*-methoxyadamantane-1-carboxamide (**1t**)



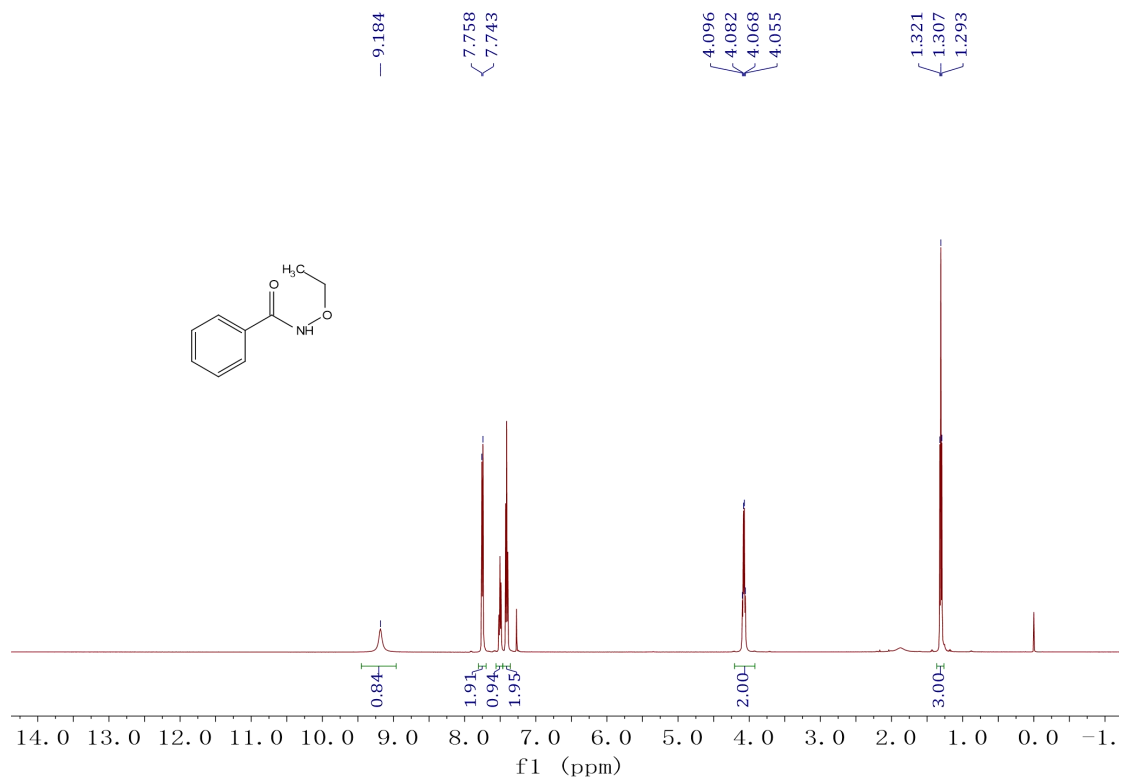

<sup>1</sup>H NMR: *N*-ethoxybenzamide (**1u**)

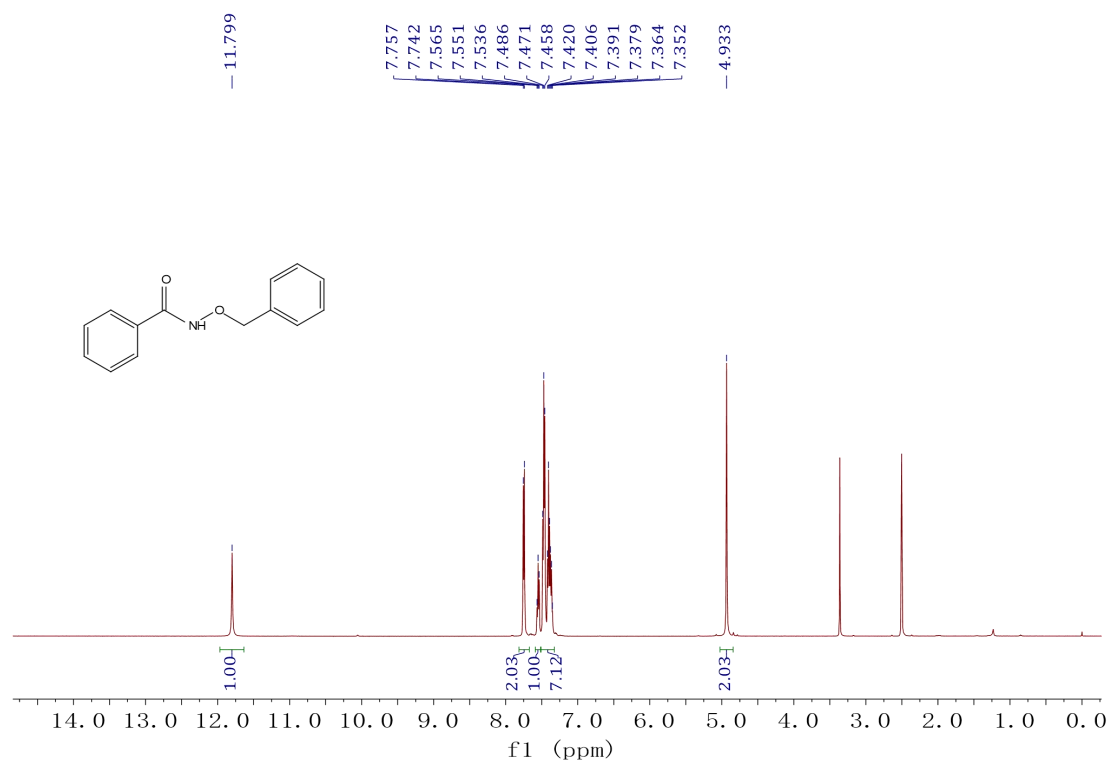

<sup>1</sup>H NMR: *N*-(benzyloxy)benzamide (**1v**)

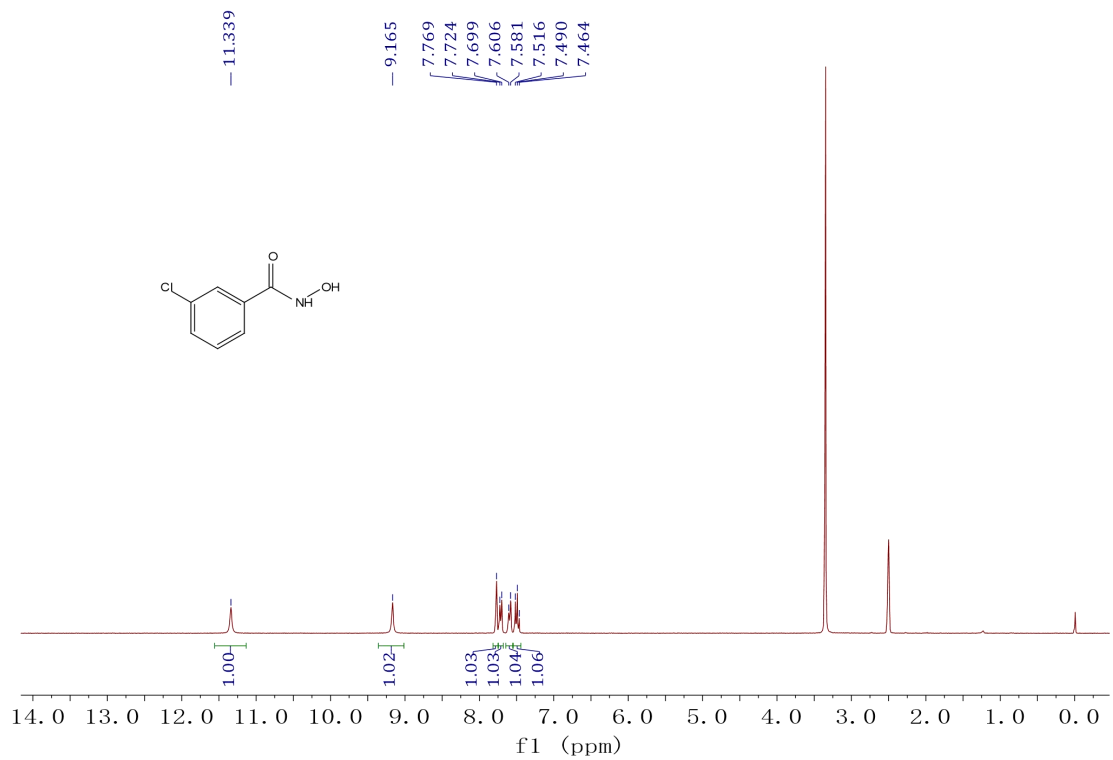

<sup>1</sup>H NMR: 3-chloro-N-hydroxybenzamide (1x)

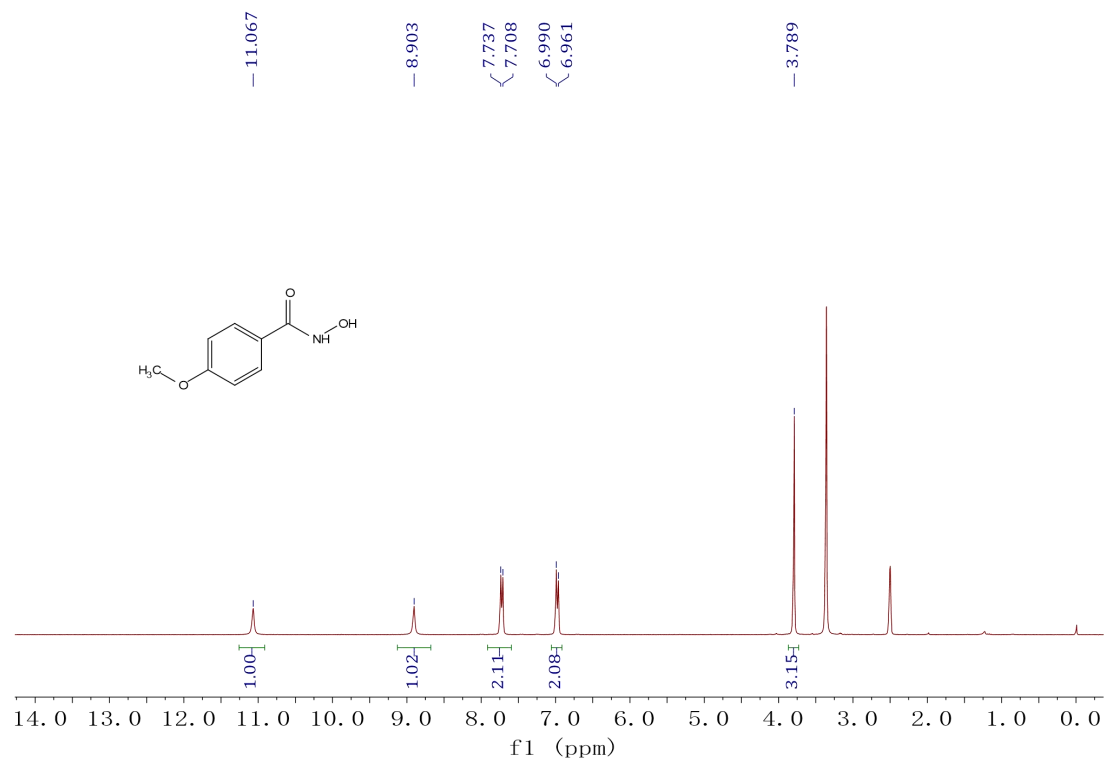

<sup>1</sup>H NMR: N-hydroxy-4-methoxybenzamide (1y)

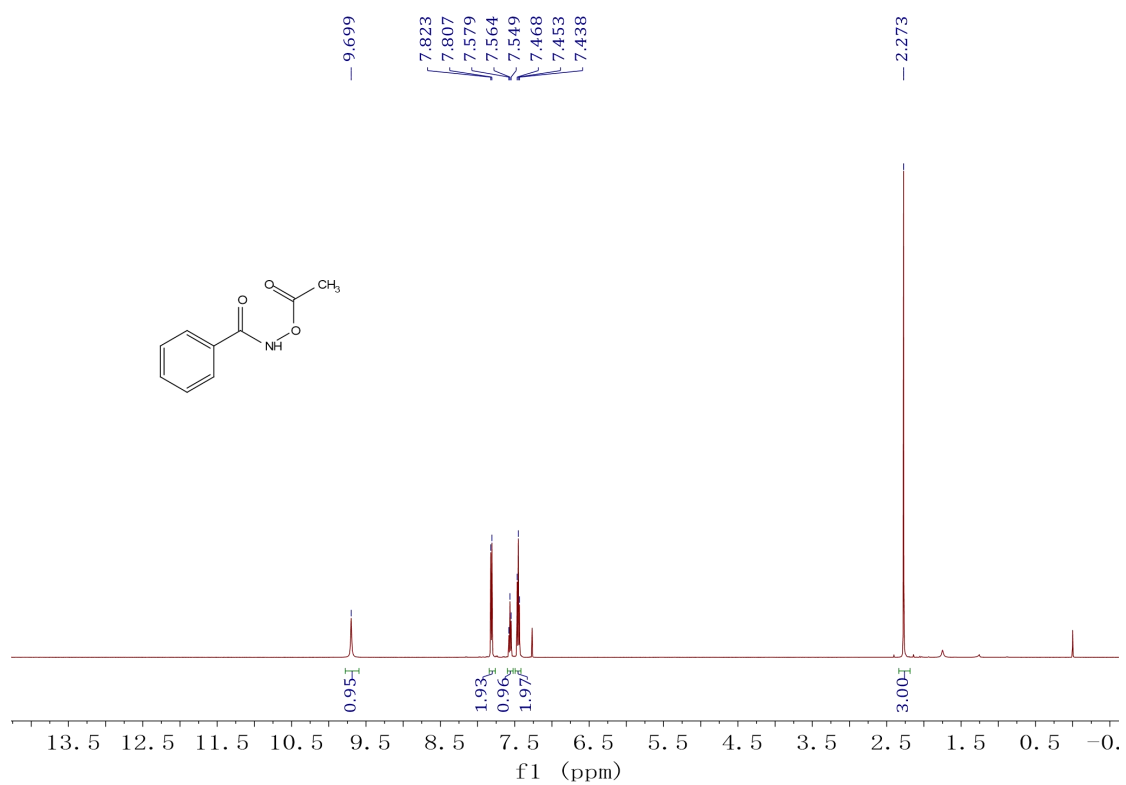

<sup>1</sup>H NMR: *N*-acetoxybenzamide (**1z**)

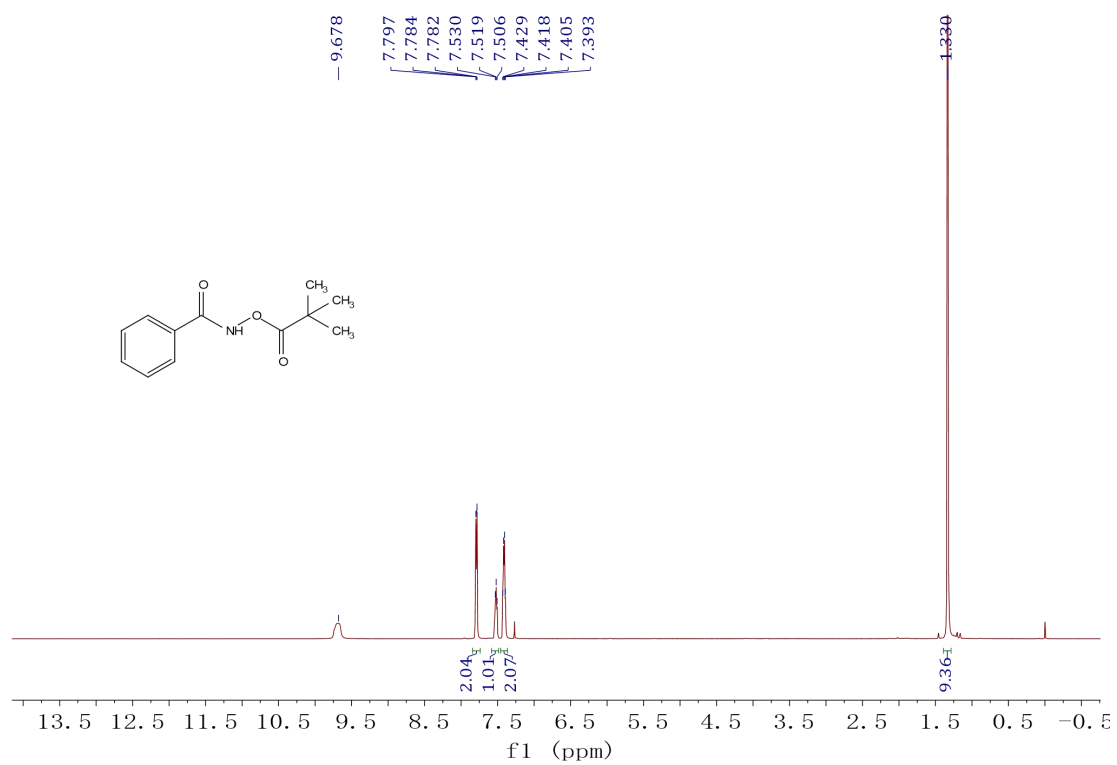

<sup>1</sup>H NMR: *N*-(pivaloyloxy)benzamide (**1aa**)

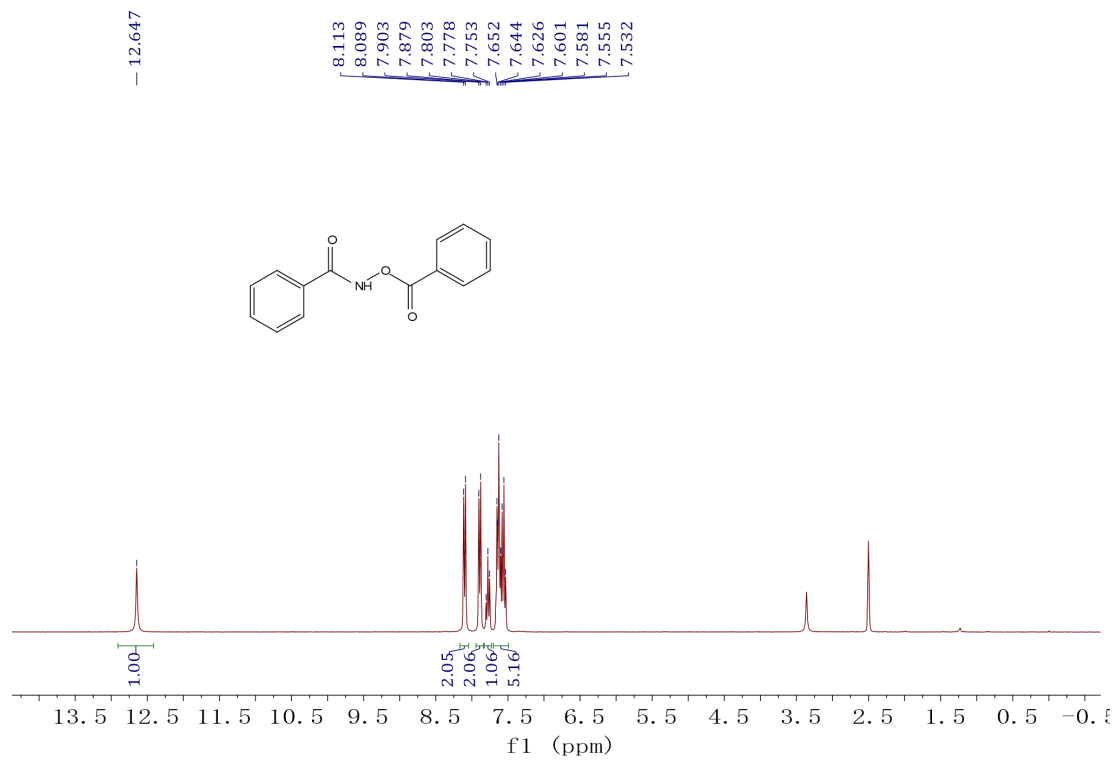

$^1\text{H NMR}$ : *N*-(benzyloxy)benzamide (**1ab**)

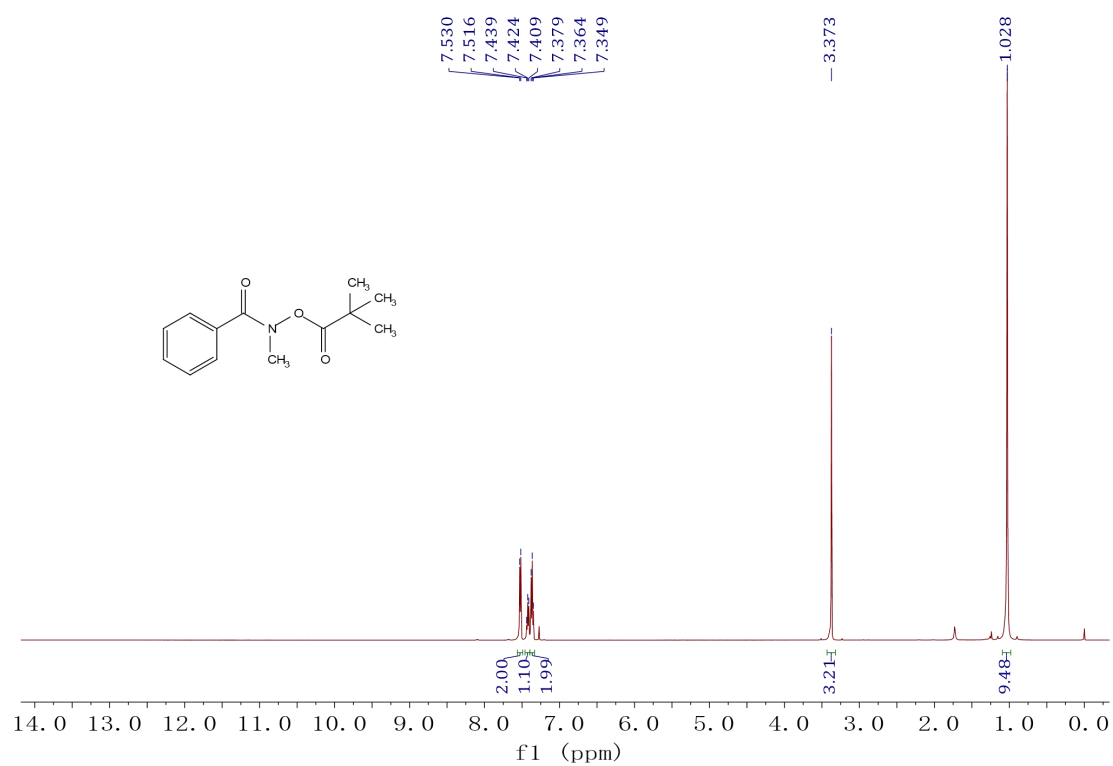

$^1\text{H NMR}$ : *N*-methyl-*N*-(pivaloyloxy)benzamide (**1ad**)

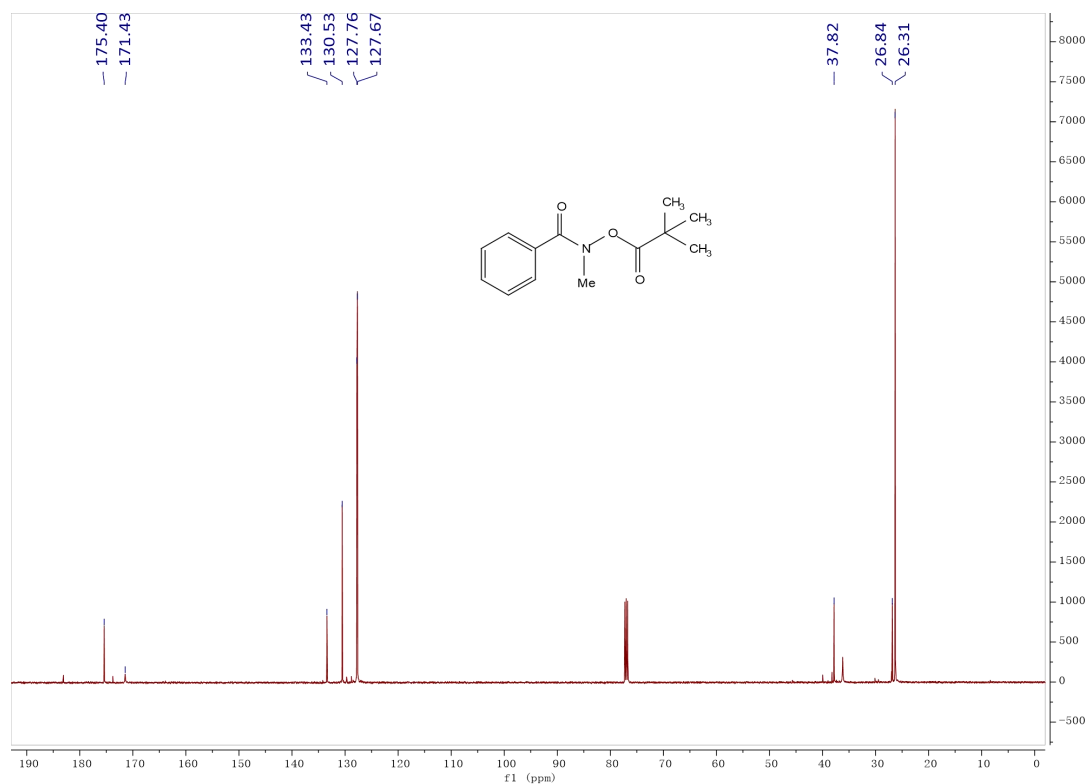

<sup>13</sup>C NMR: *N*-methyl-*N*-(pivaloyloxy)benzamide (**1ad**)

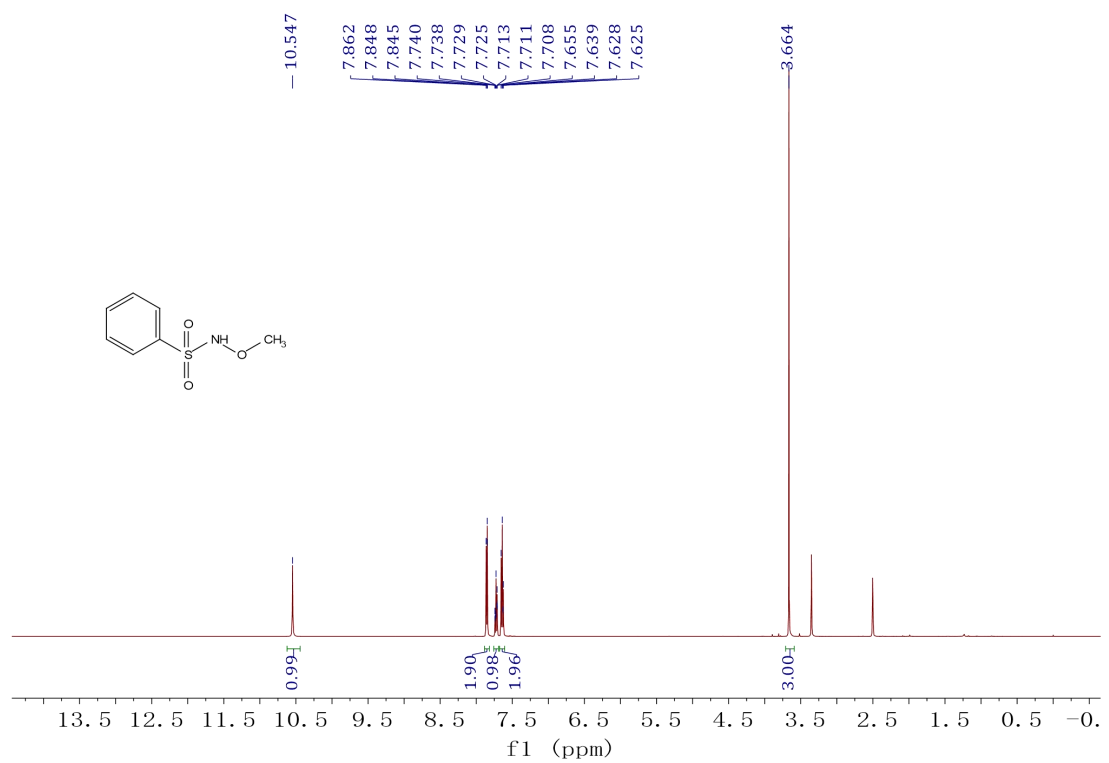

<sup>1</sup>H NMR: *N*-methoxybenzenesulfonamide (**3a**)

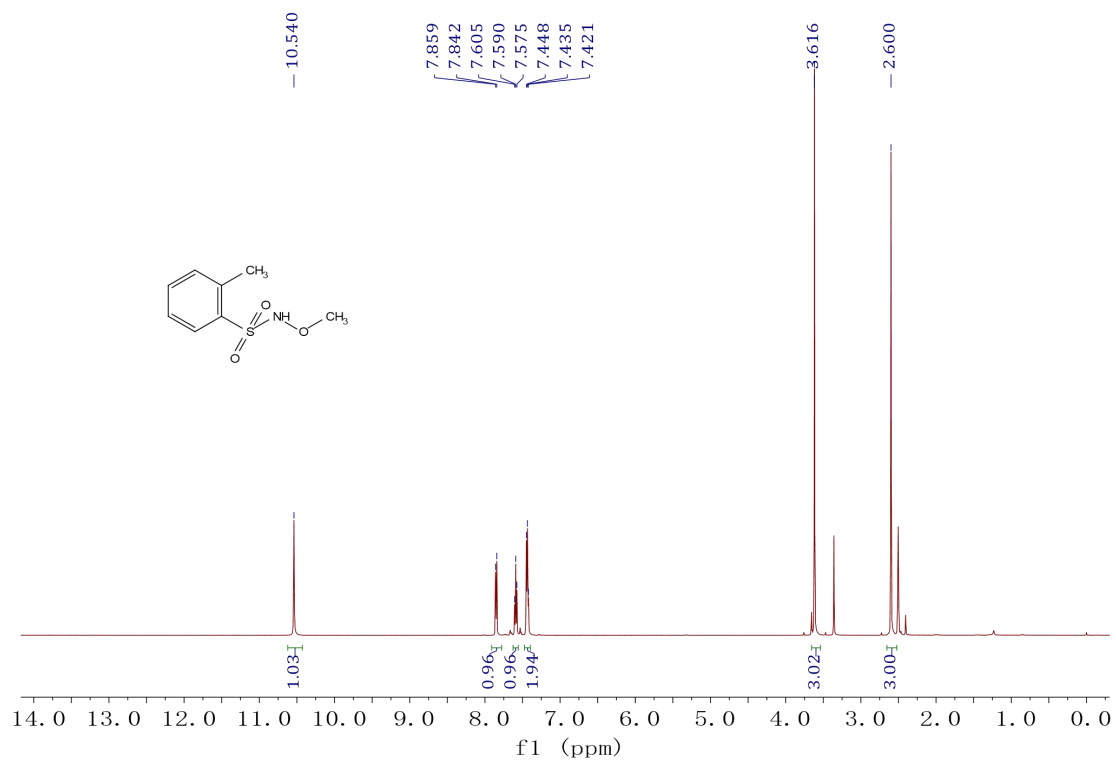

<sup>1</sup>H NMR: *N*-methoxy-2-methylbenzenesulfonamide (3b)

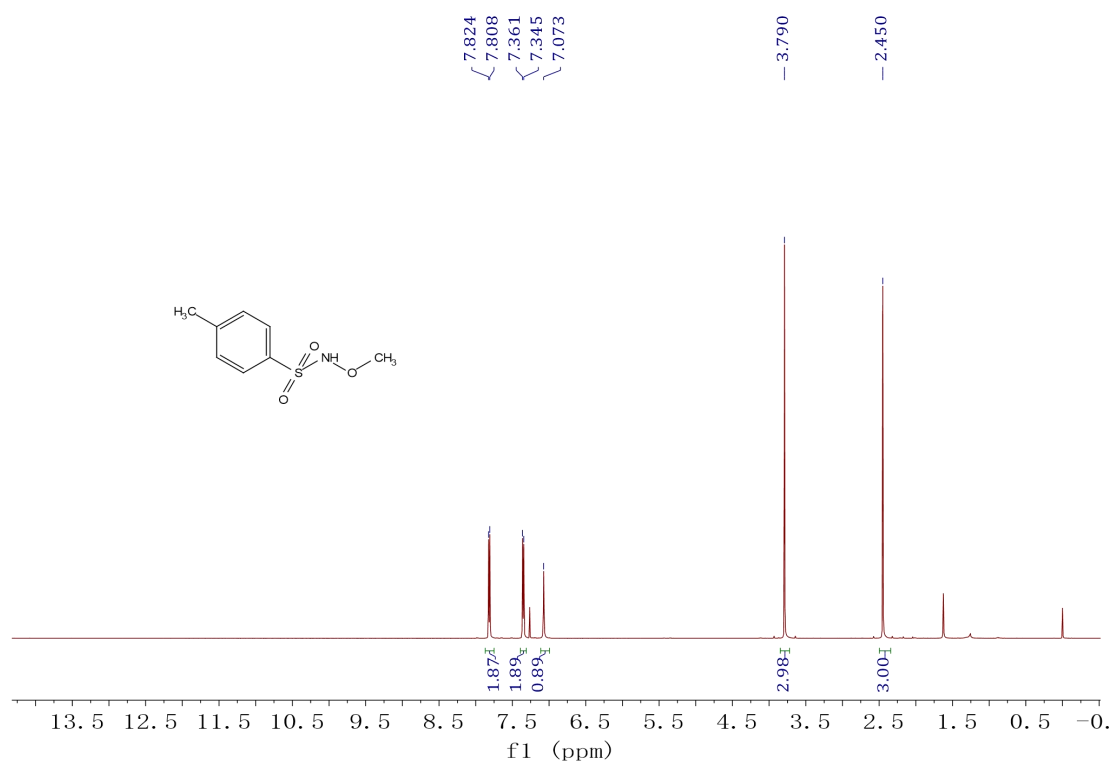

<sup>1</sup>H NMR: *N*-methoxy-4-methylbenzenesulfonamide (3c)

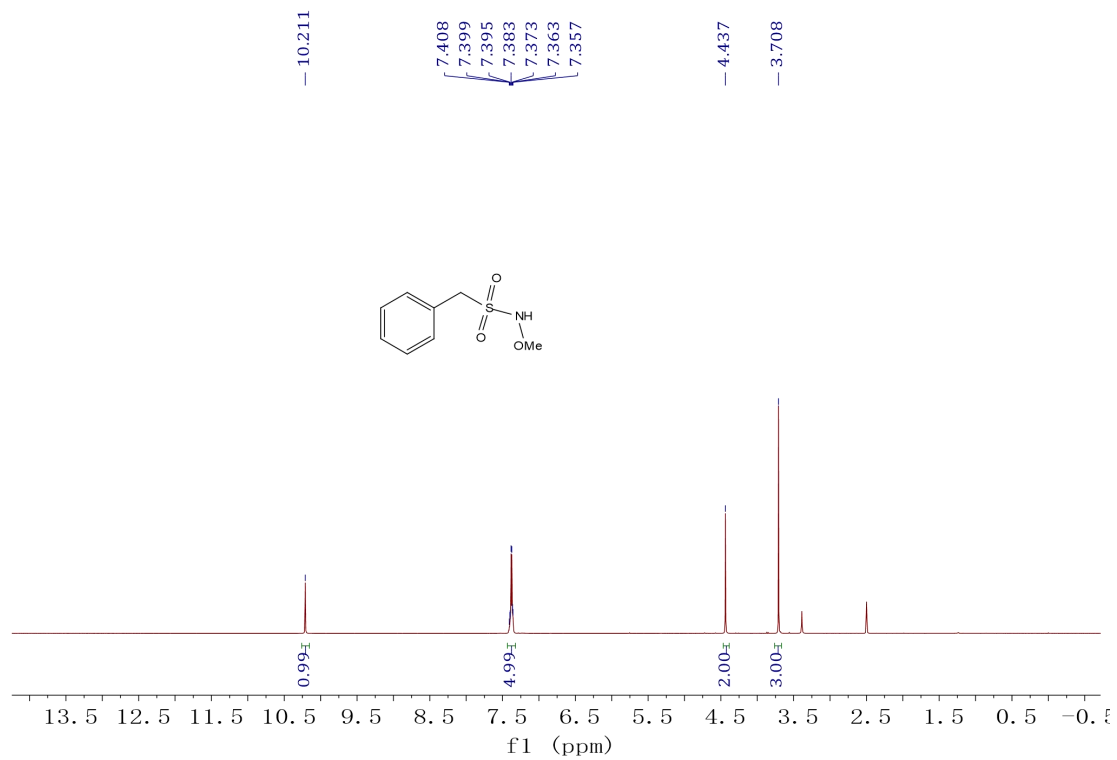

<sup>1</sup>H NMR: *N*-methoxy-1-phenylmethanesulfonamide (3d)

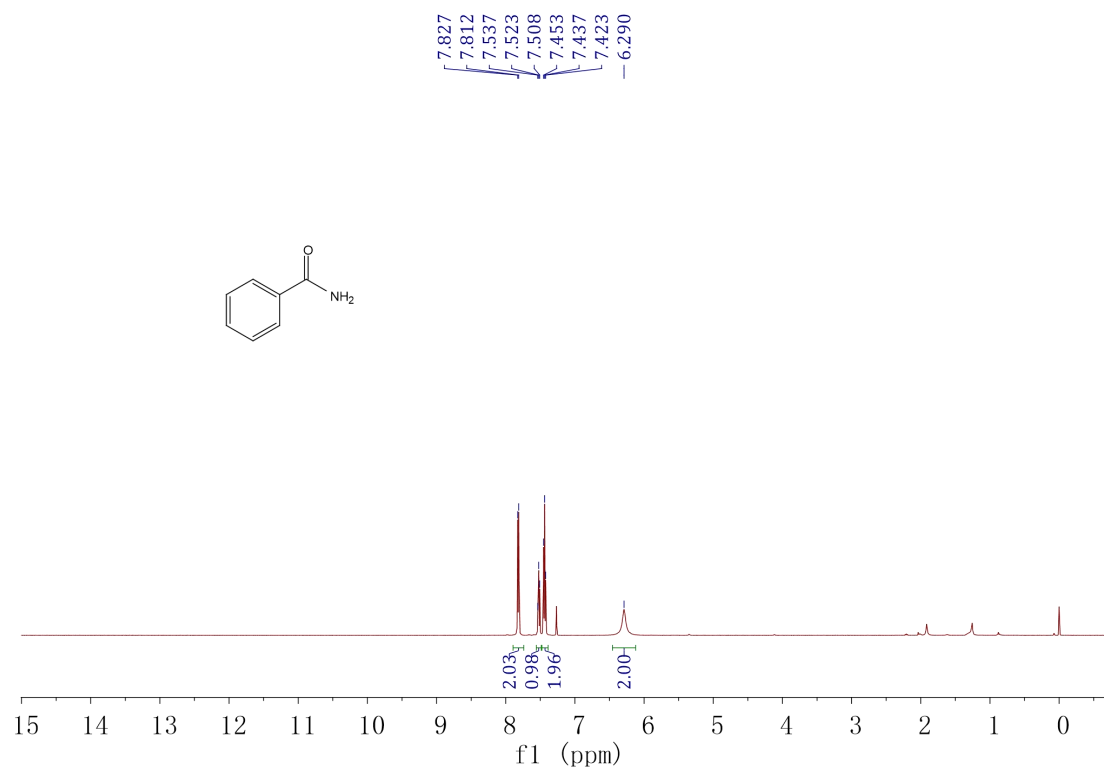

<sup>1</sup>H NMR: benzamide (2a)

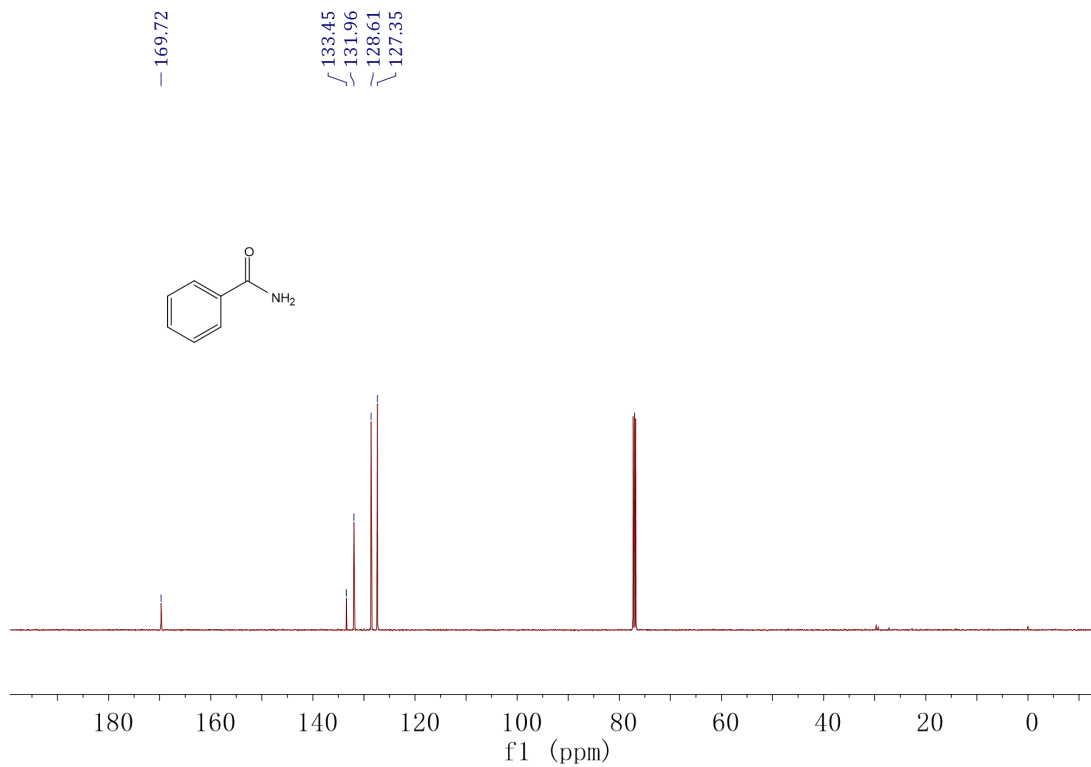

$^{13}\text{C}$  NMR: benzamide (**2a**)

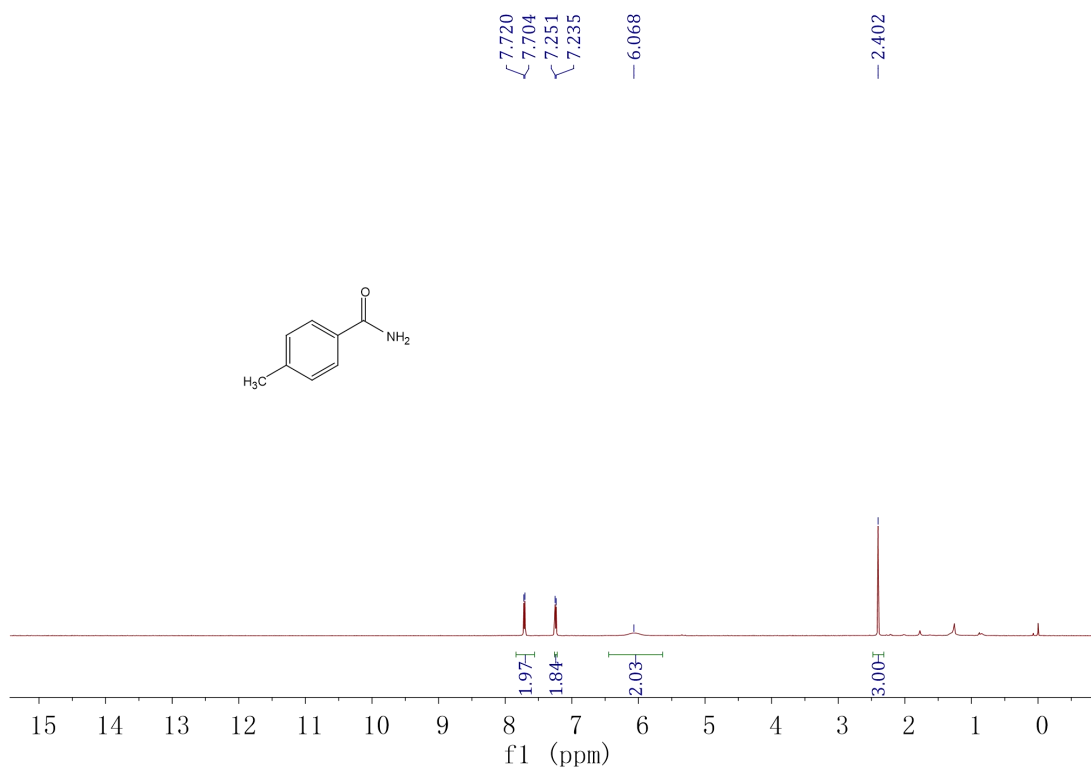

$^1\text{H}$  NMR: 4-methylbenzamide (**2b**)



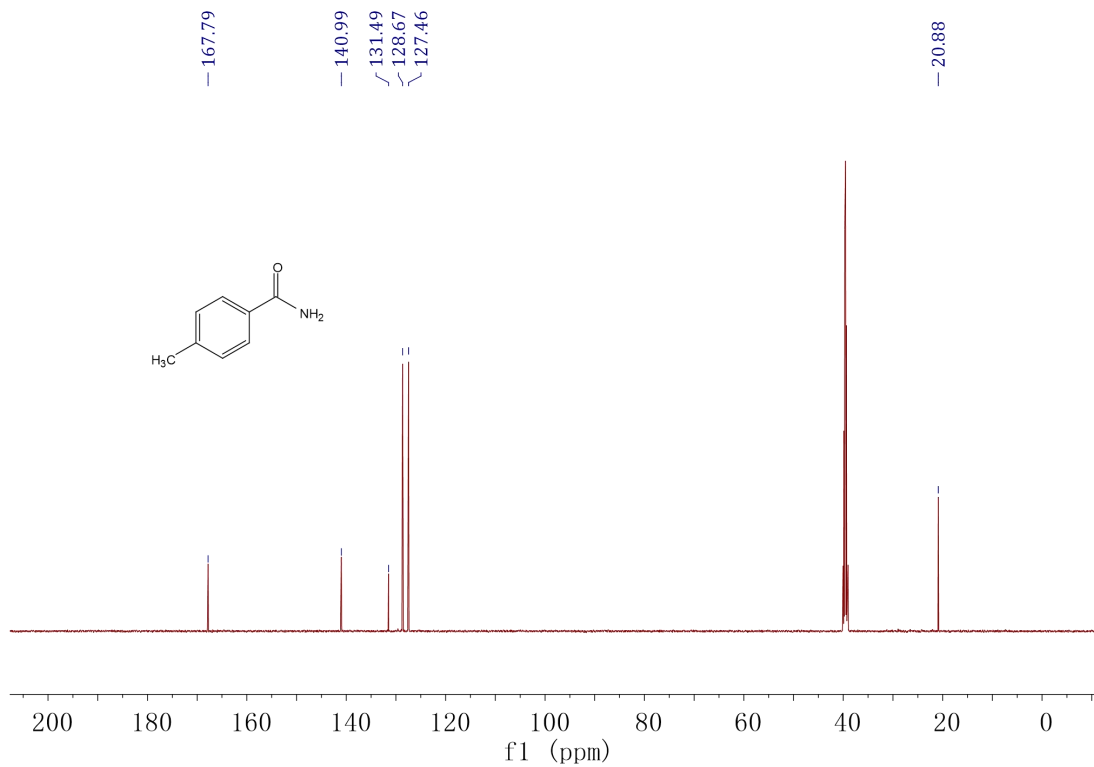

<sup>13</sup>C NMR: *4-methylbenzamide (2b)*

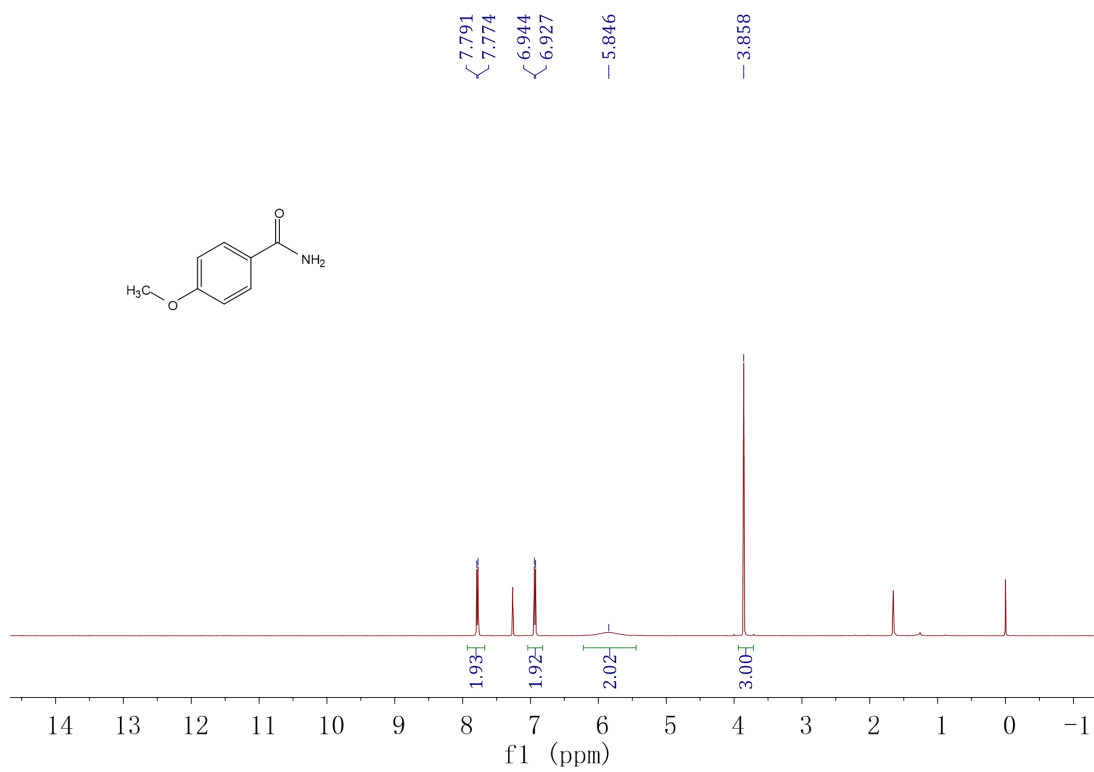

<sup>1</sup>H NMR: *4-methoxybenzamide (2c)*

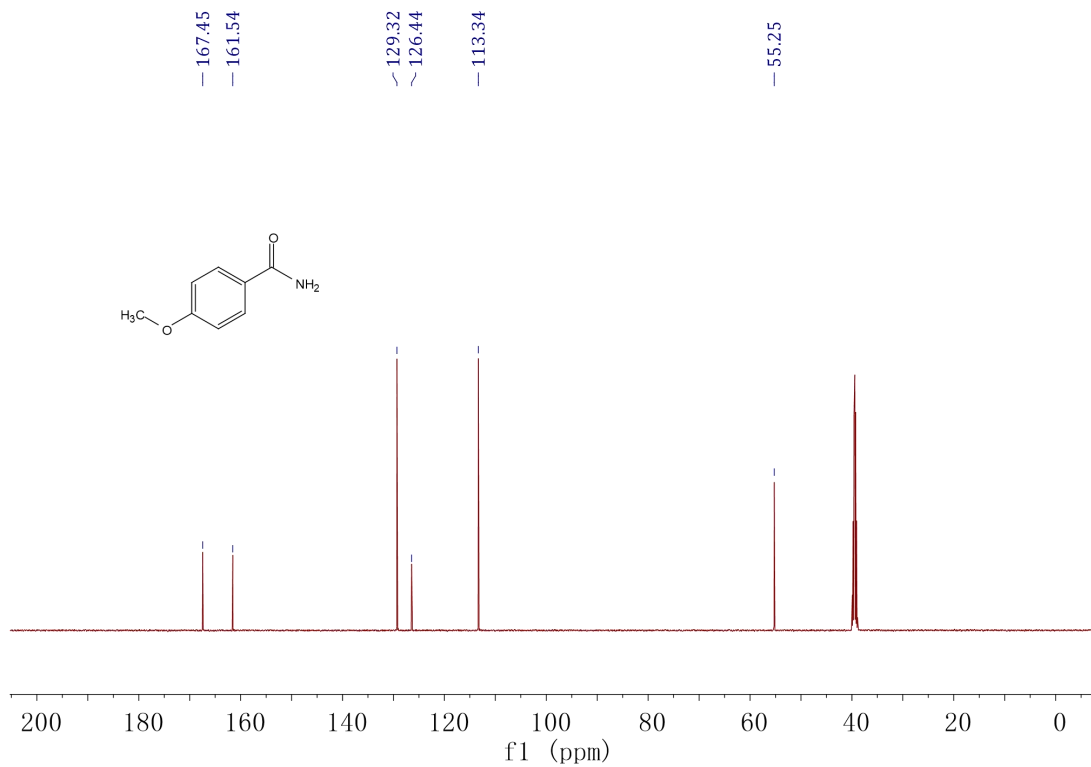

<sup>13</sup>C NMR: 4-methoxybenzamide (2c)

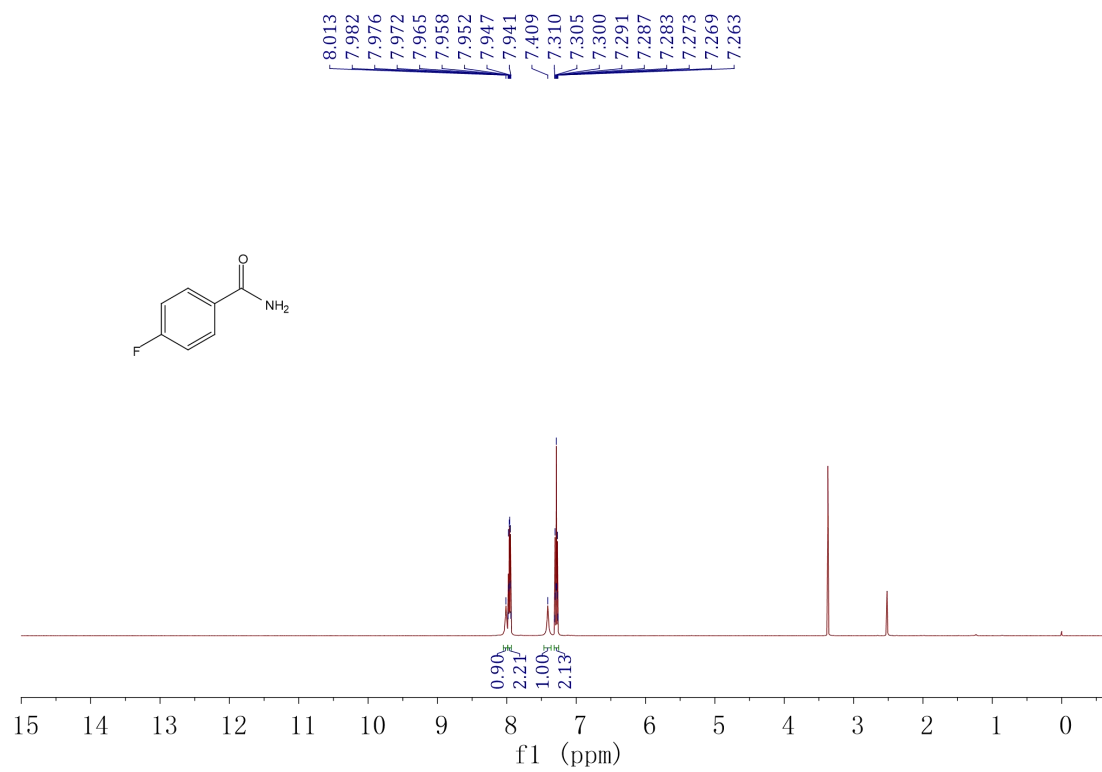

<sup>1</sup>H NMR: 4-fluorobenzamide (2d)

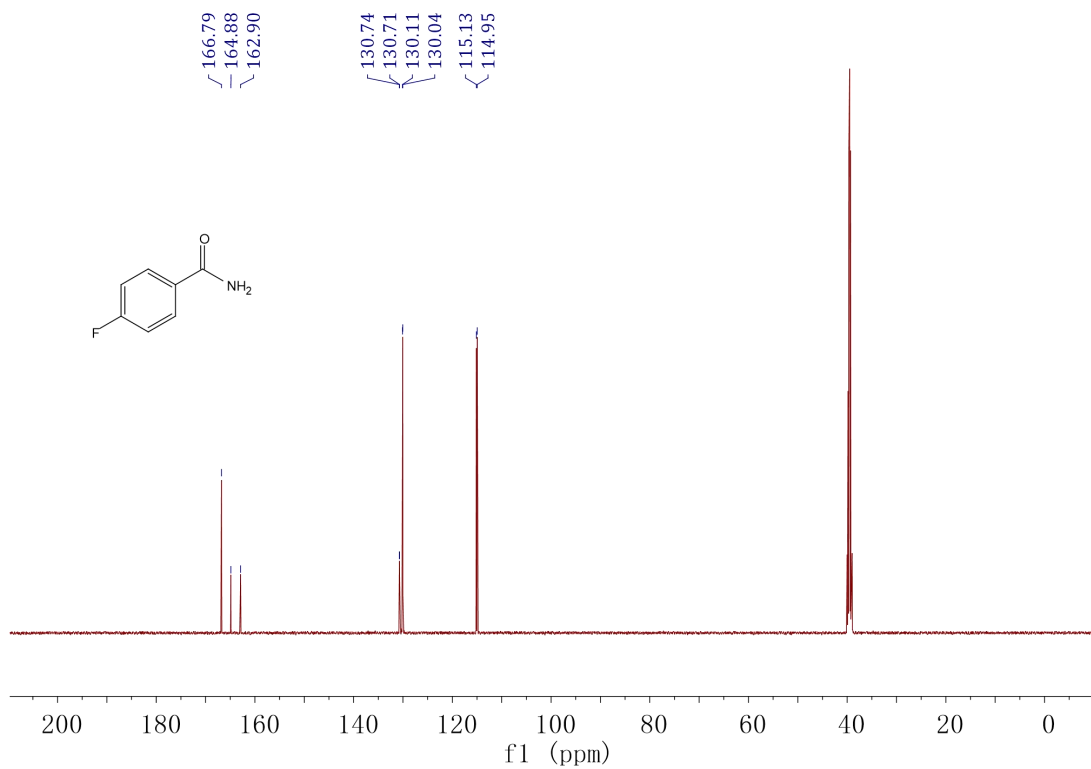

<sup>13</sup>C NMR: 4-fluorobenzamide (**2d**)

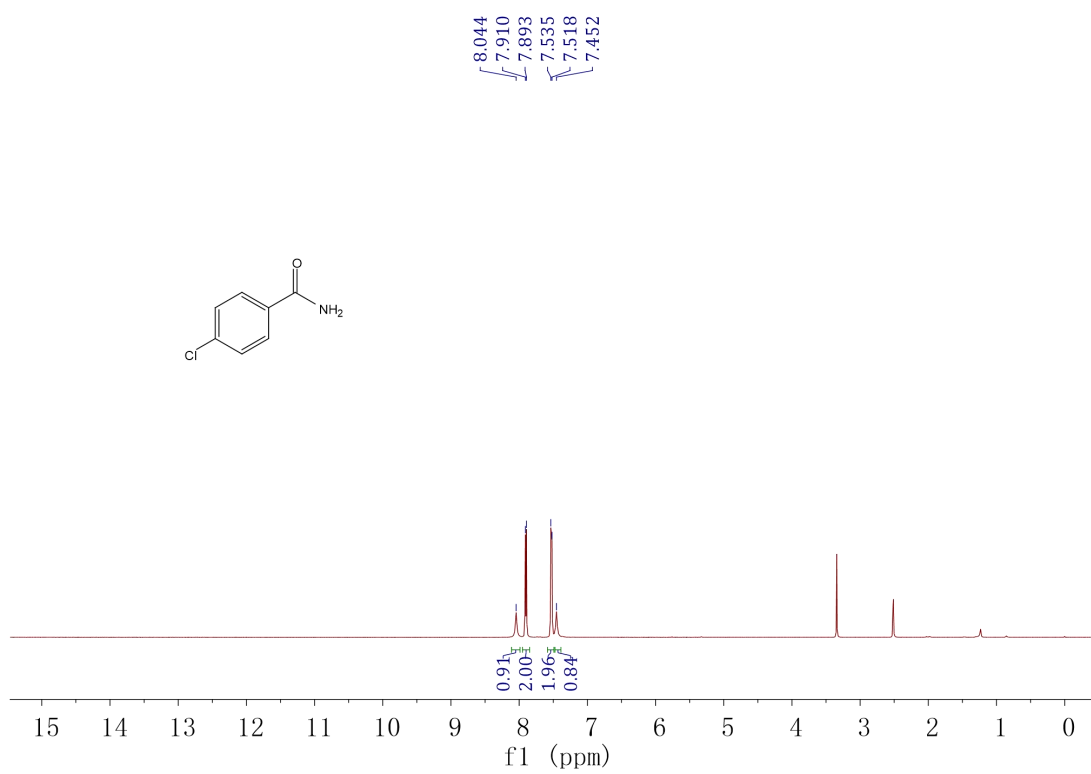

<sup>1</sup>H NMR: 4-chlorobenzamide (**2e**)

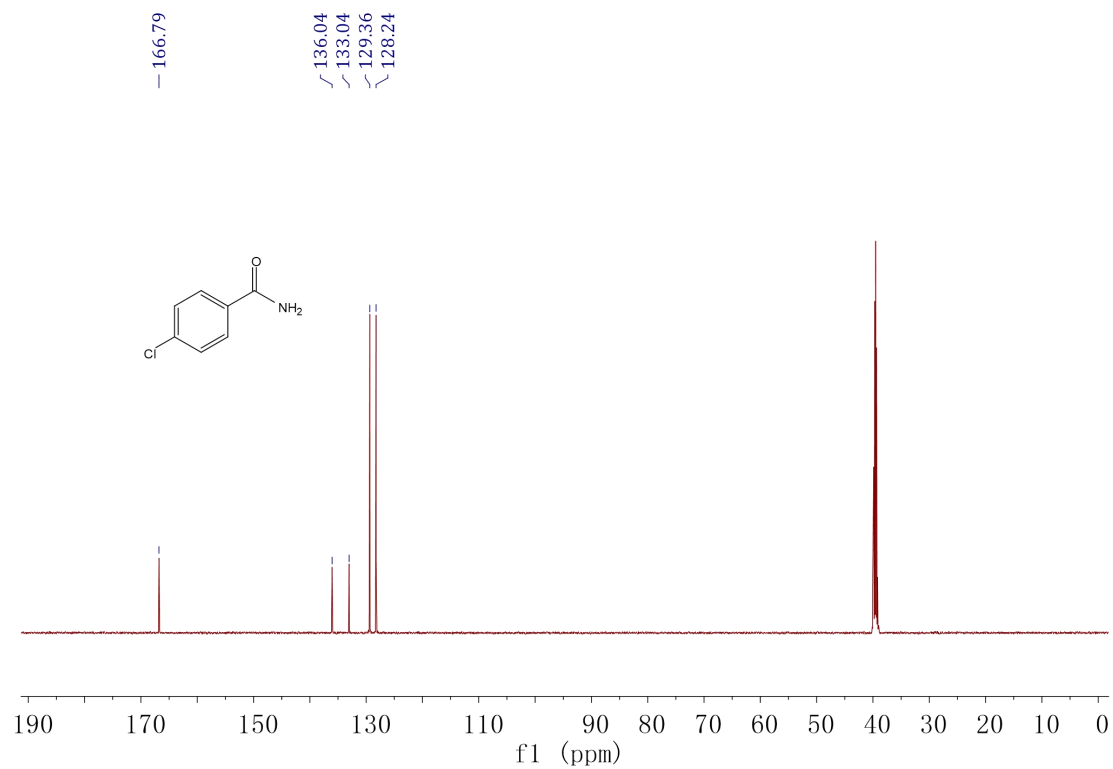

<sup>13</sup>C NMR: 4-chlorobenzamide (**2e**)

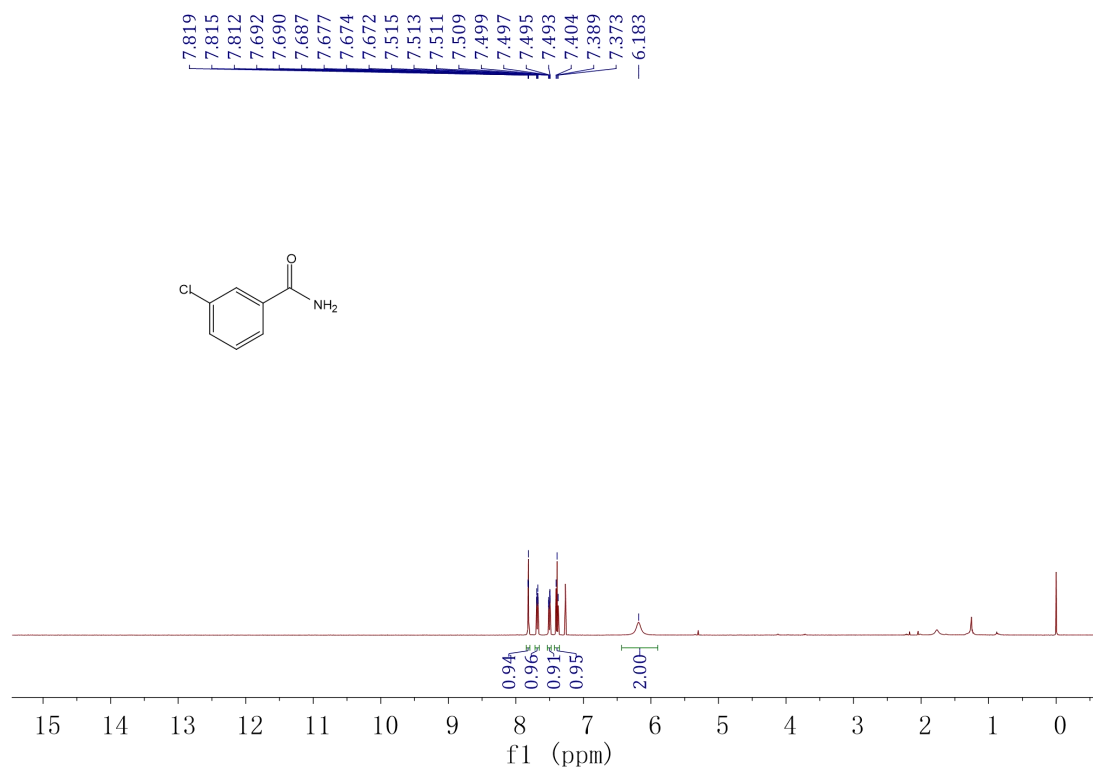

<sup>1</sup>H NMR: 3-chlorobenzamide (**2f**)

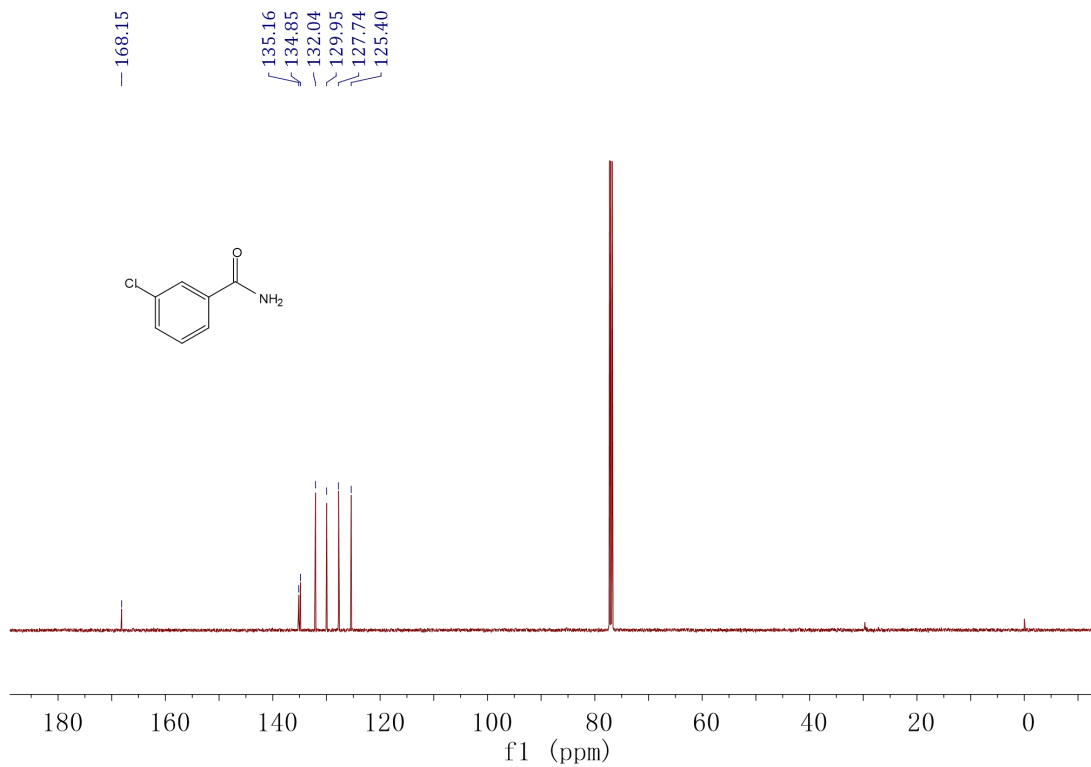

$^{13}\text{C}$  NMR: 3-chlorobenzamide (**2f**)

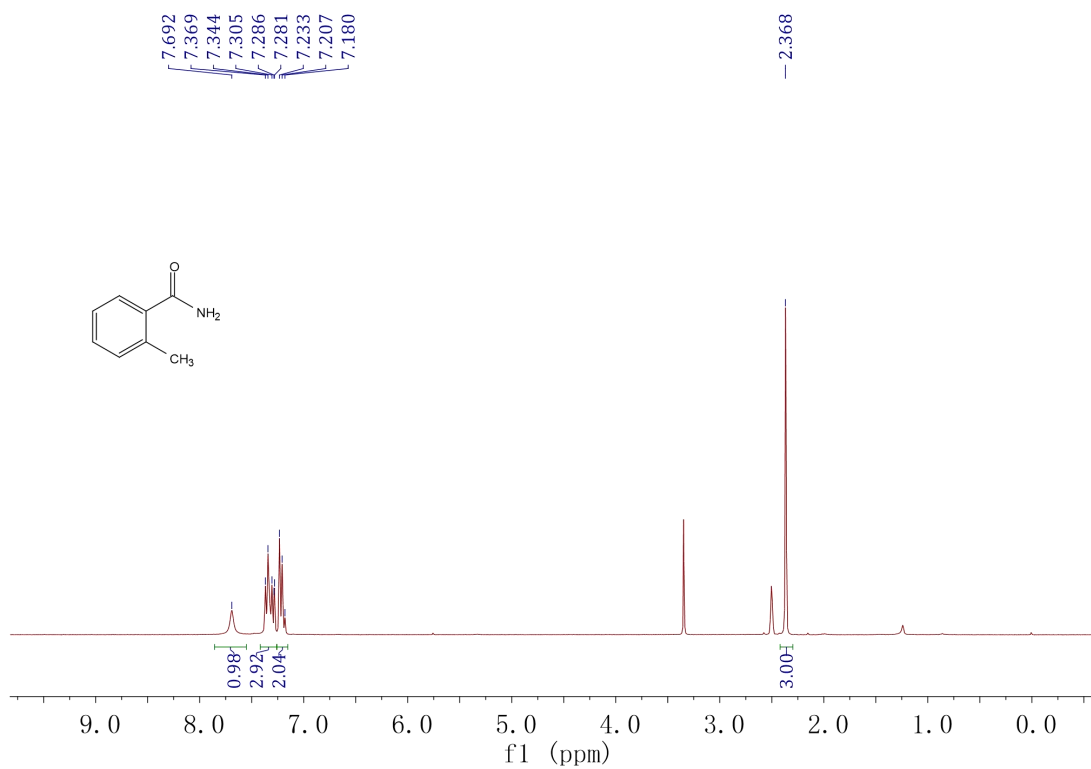

$^1\text{H}$  NMR: 2-methylbenzamide (**2g**)

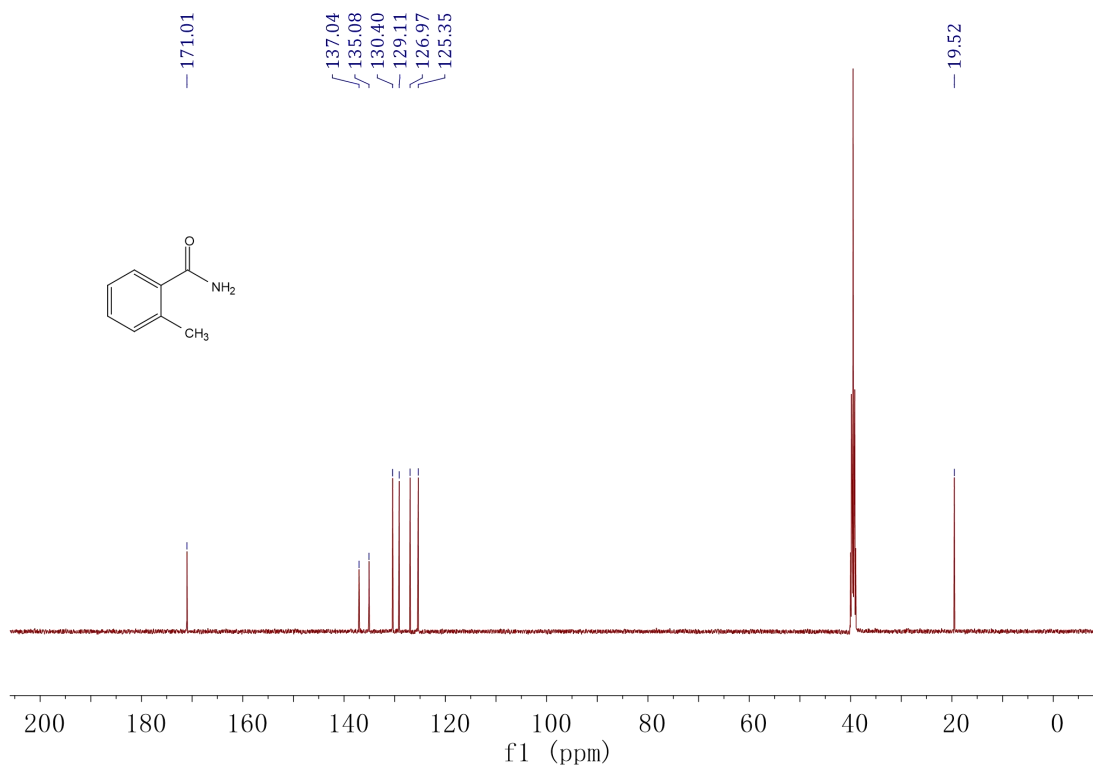

$^{13}\text{C}$  NMR: 3-methylbenzamide (**2g**)

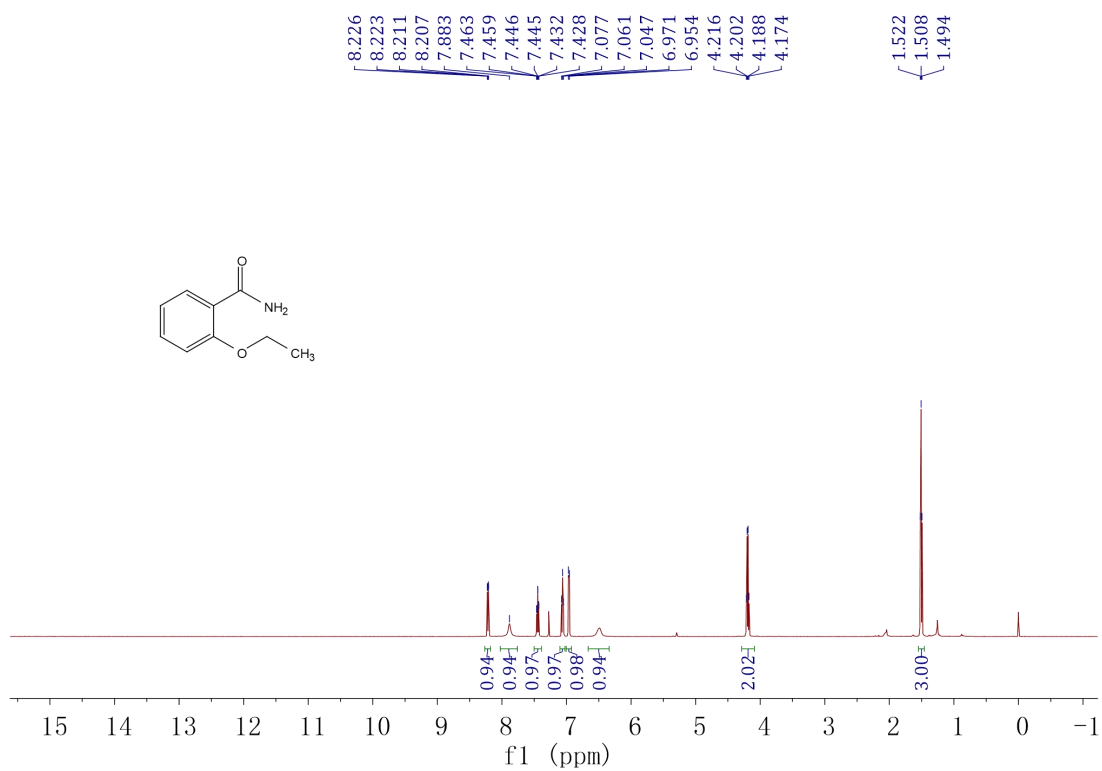

$^1\text{H}$  NMR: 2-ethoxybenzamide (**2h**)

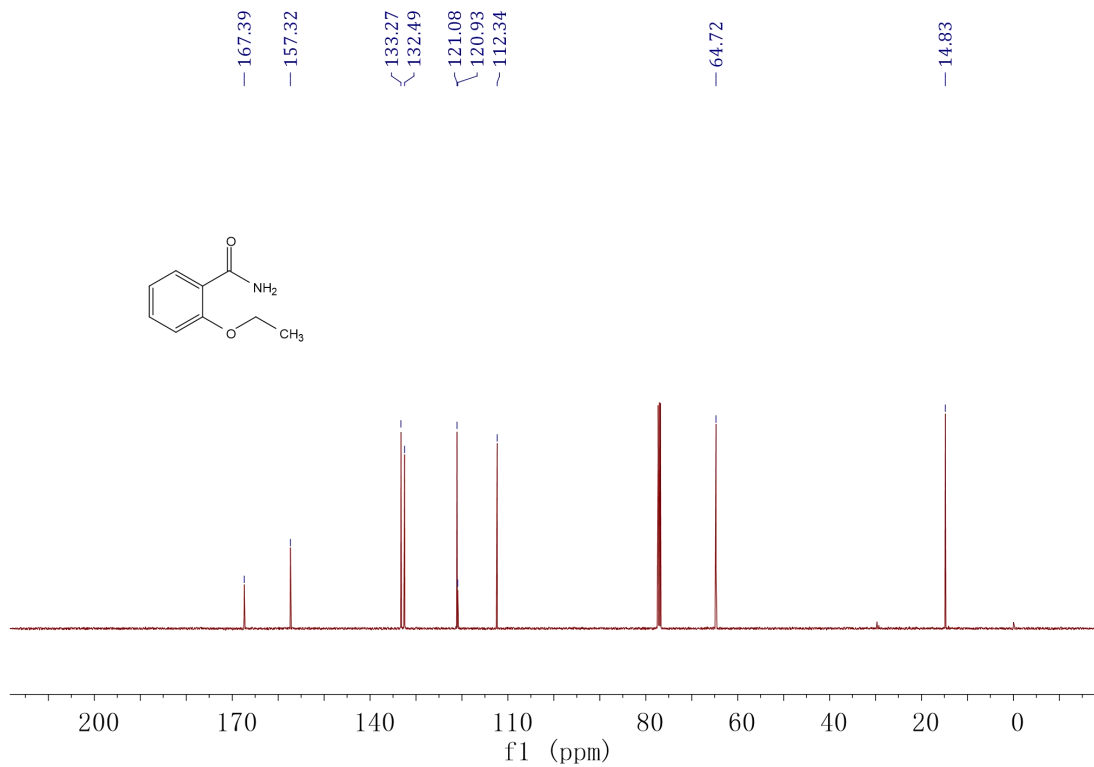

$^{13}\text{C}$  NMR: 2-ethoxybenzamide (**2h**)

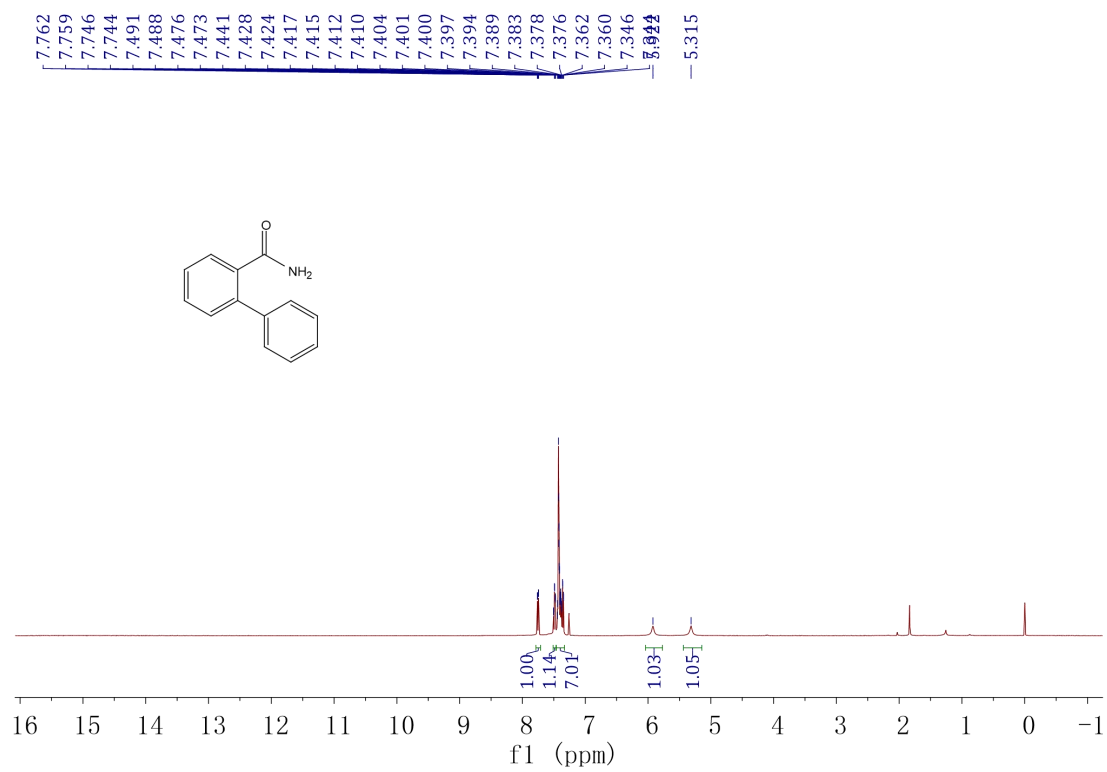

$^1\text{H}$  NMR: [1,1'-biphenyl]-2-carboxamide (**2i**)

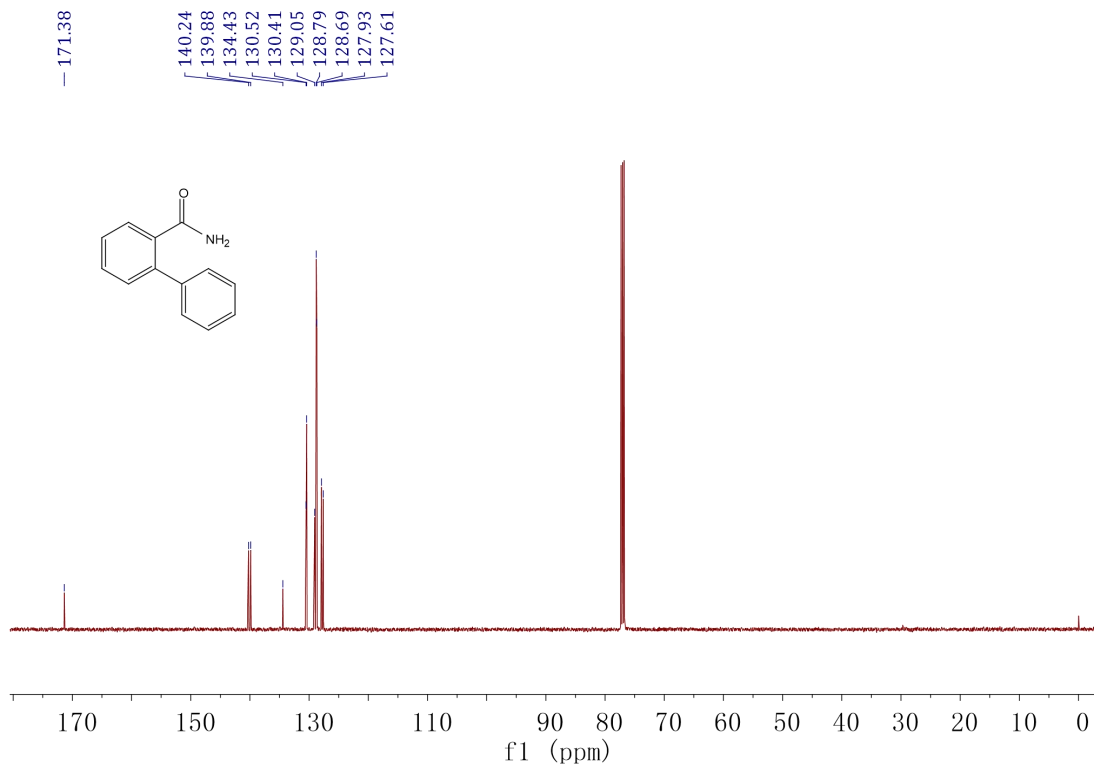

<sup>13</sup>C NMR: [1,1'-biphenyl]-2-carboxamide (**2i**)

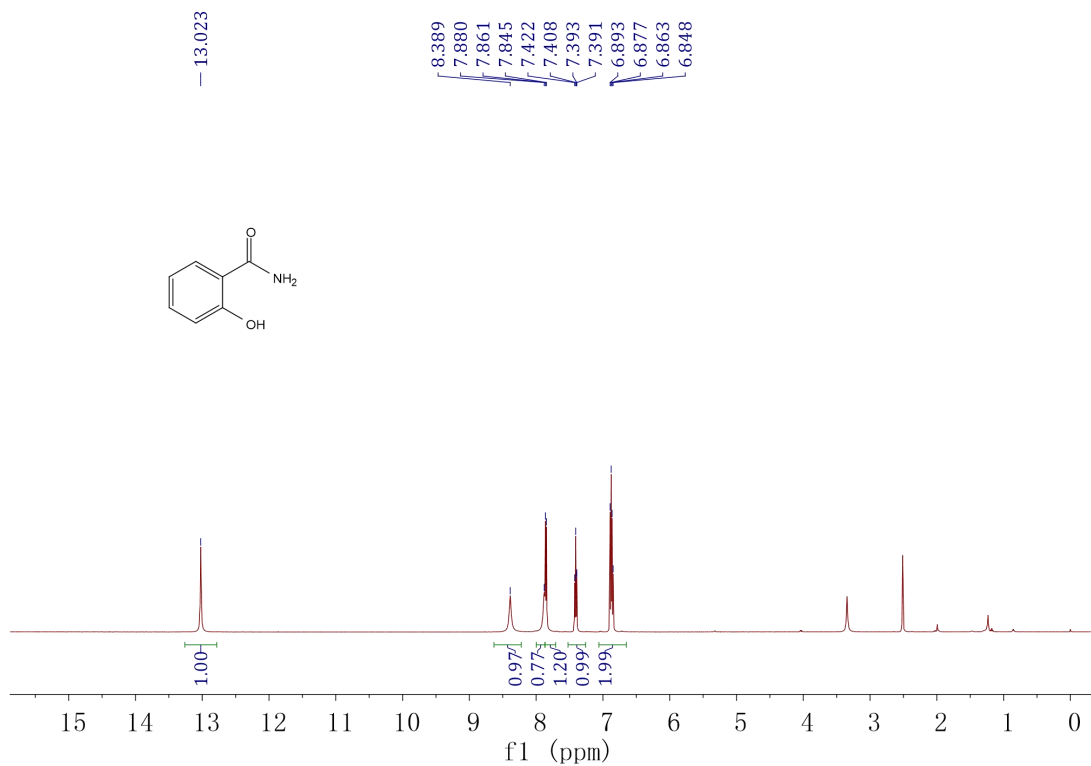

<sup>1</sup>H NMR: 2-hydroxybenzamide (**2j**)



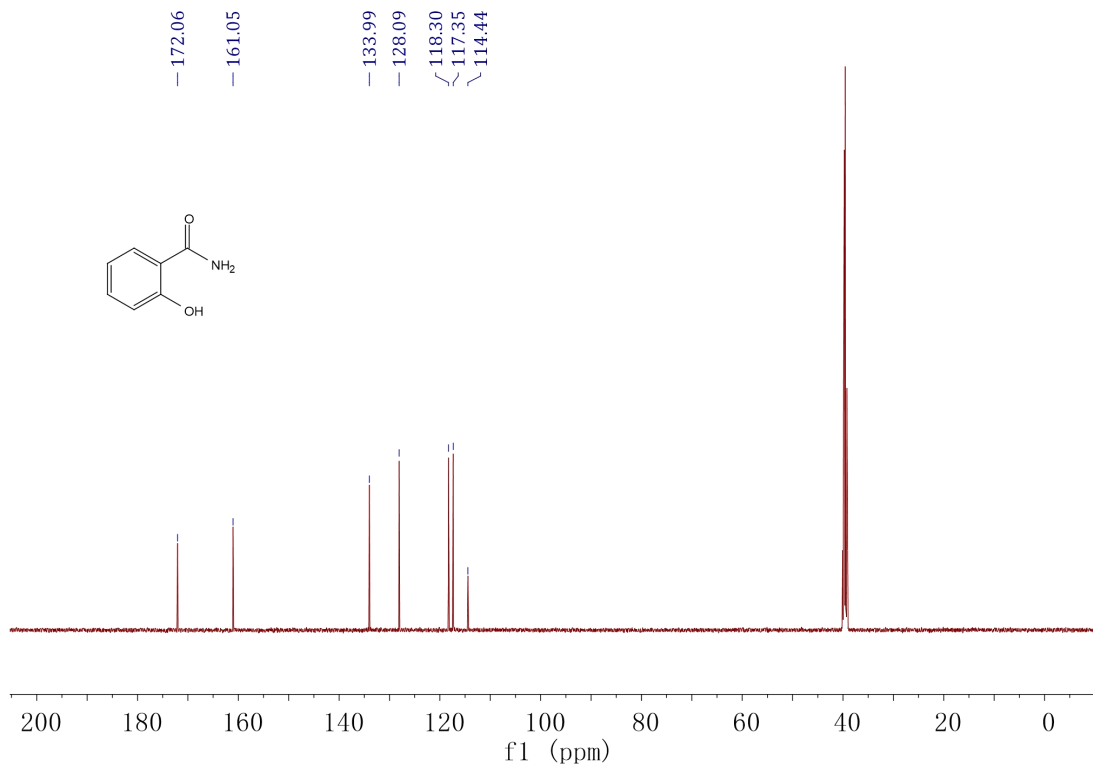

<sup>13</sup>C NMR: 2-hydroxybenzamide (**2j**)

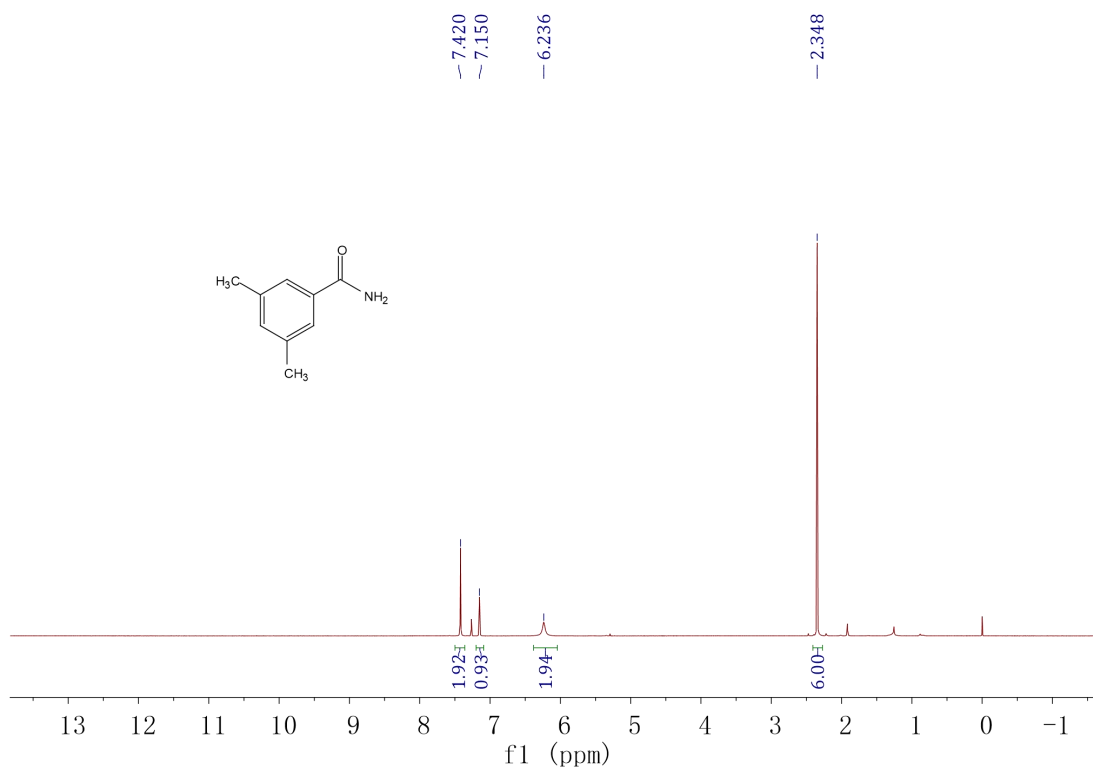

<sup>1</sup>H NMR: 3,5-dimethylbenzamide (**2k**)

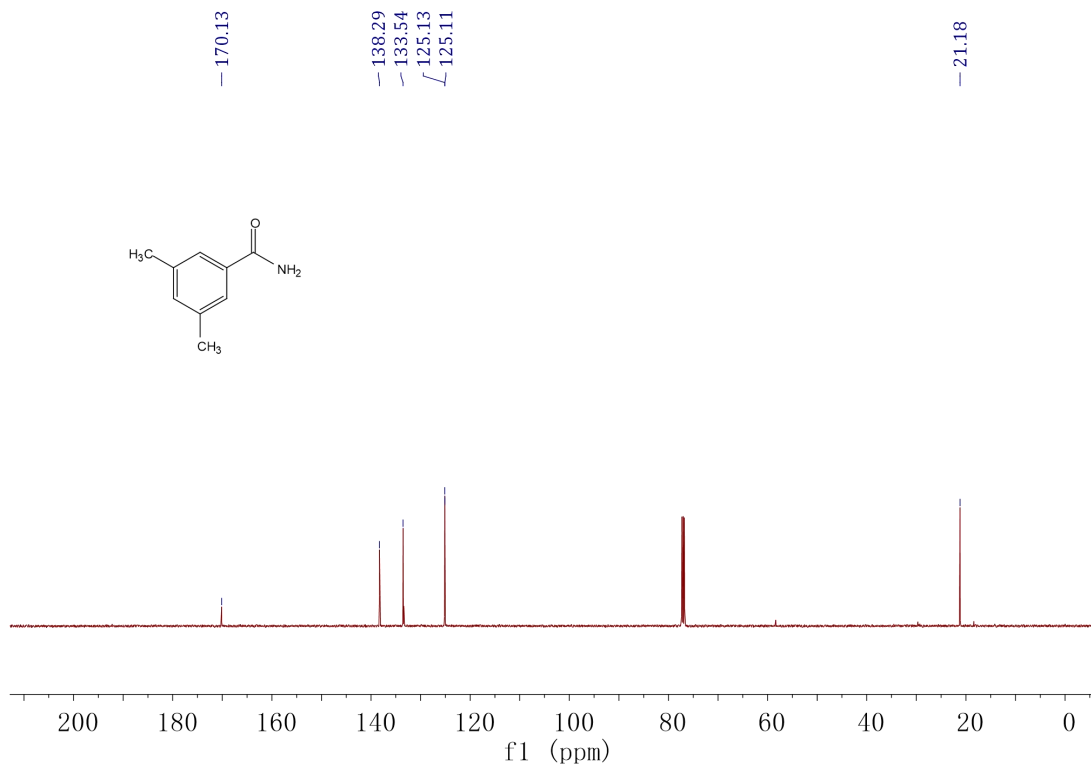

$^{13}\text{C}$  NMR: 3,5-dimethylbenzamide (**2k**)

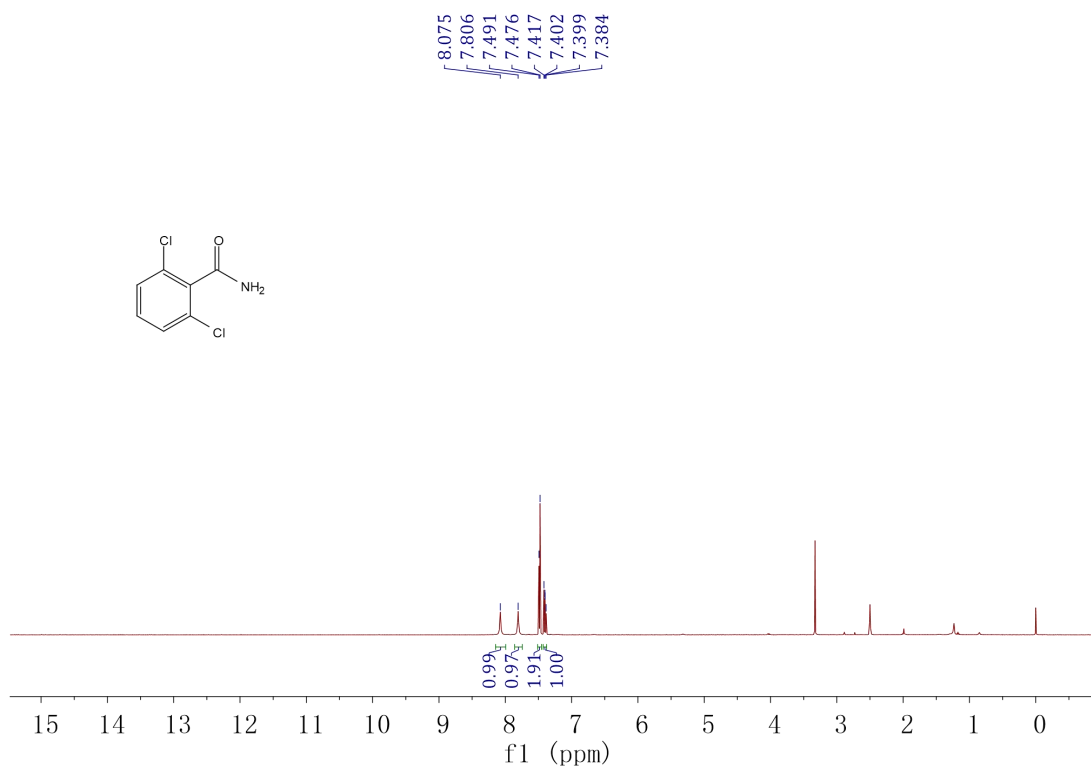

$^1\text{H}$  NMR: 2,6-dichlorobenzamide (**2l**)

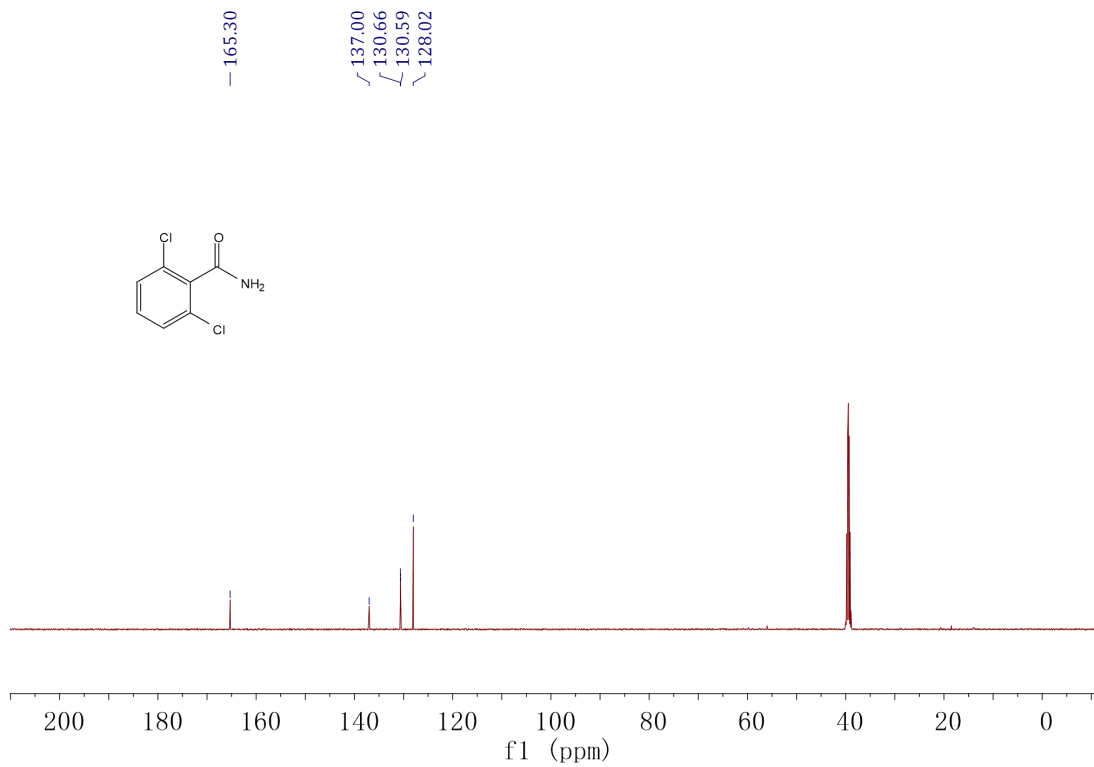

$^{13}\text{C}$  NMR: 2,6-dichlorobenzamide (**2l**)

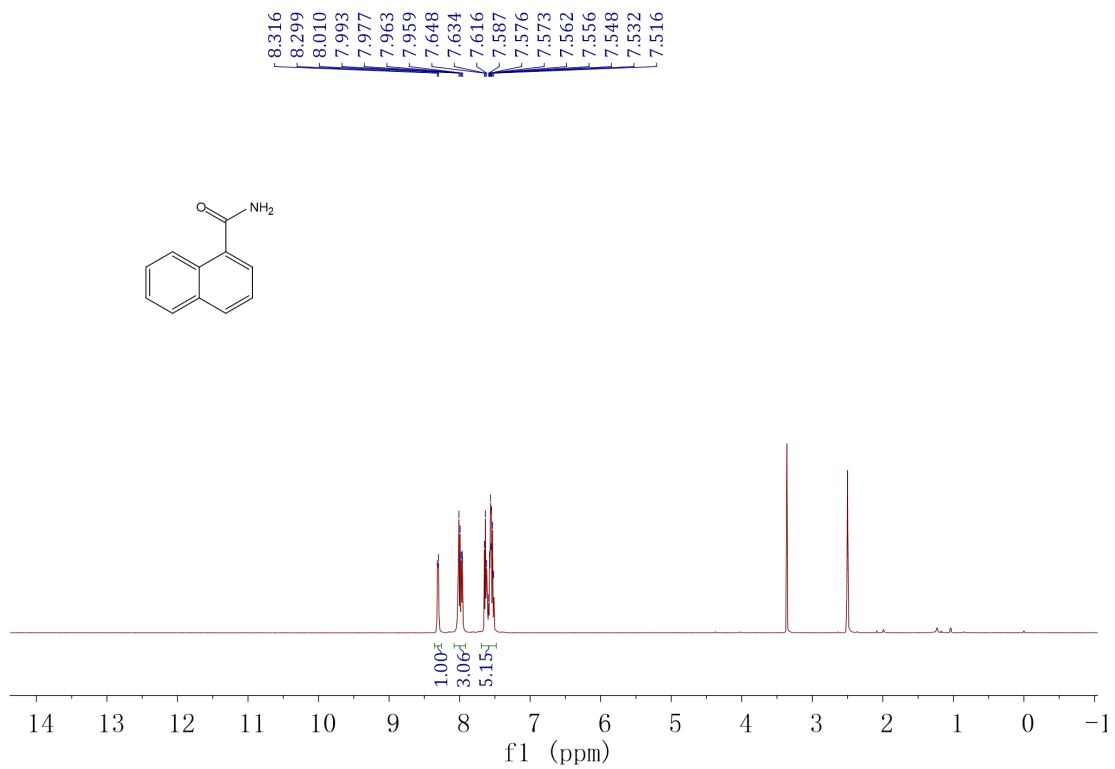

$^1\text{H}$  NMR: 1-naphthamide (**2m**)

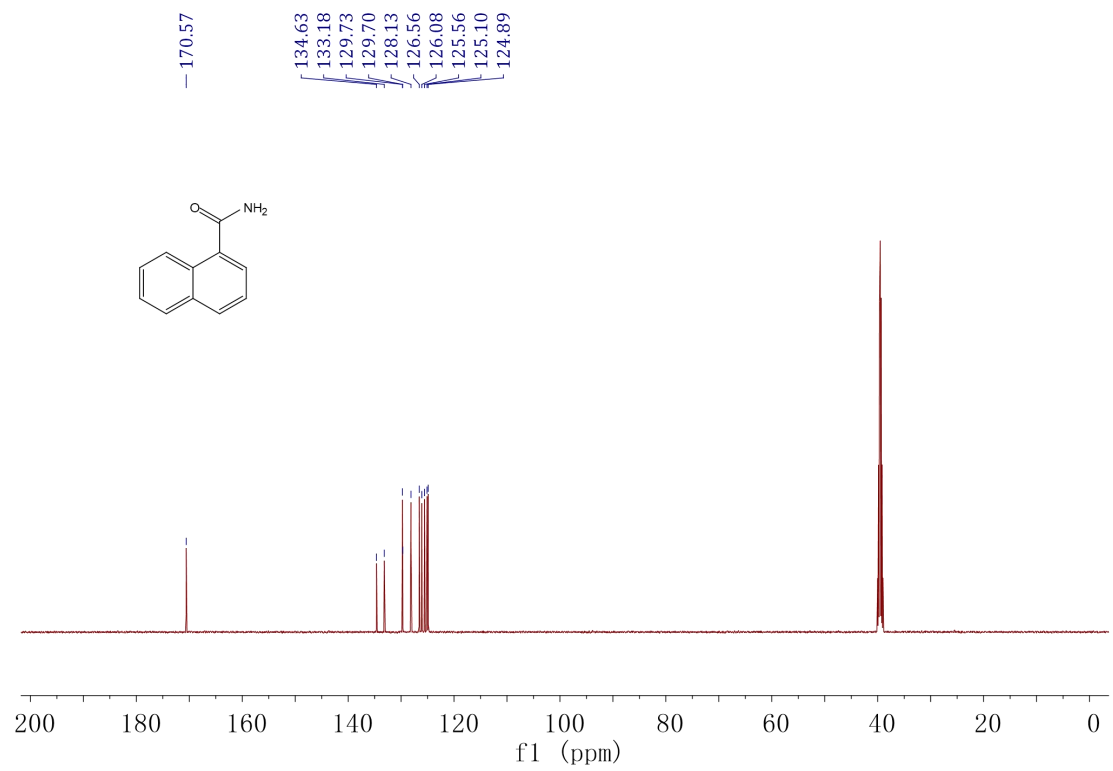

$^{13}\text{C}$  NMR: *1-naphthamide* (**2m**)

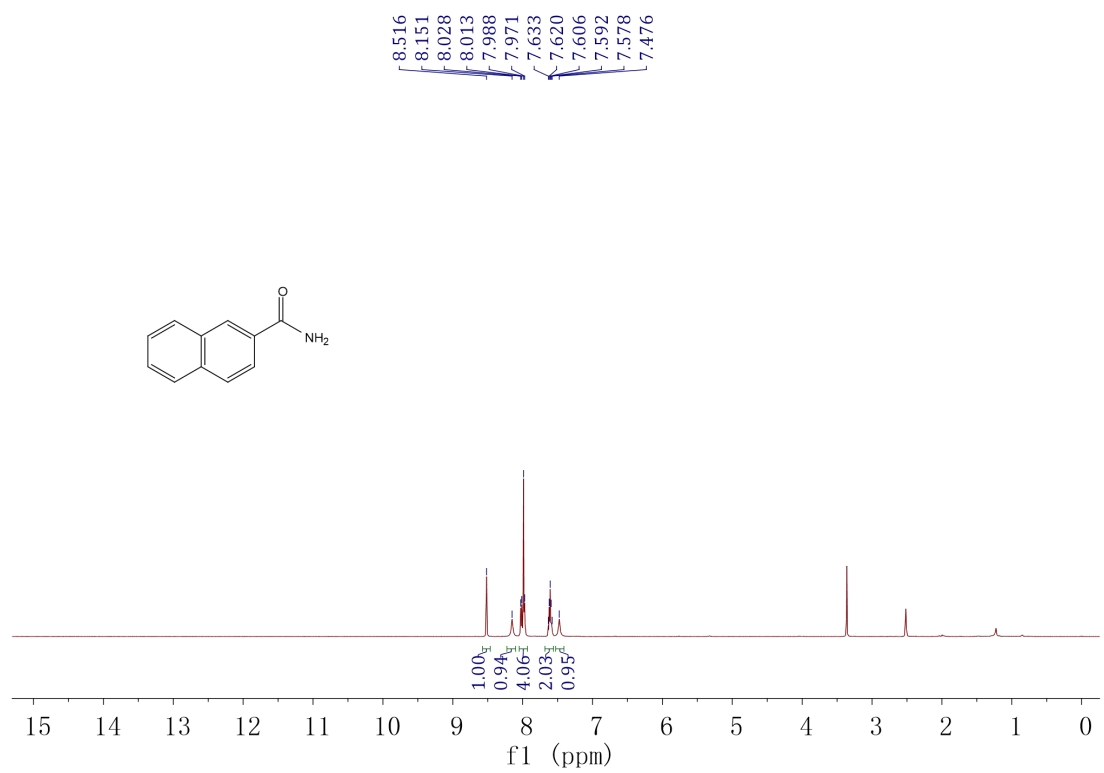

$^1\text{H}$  NMR: *2-naphthamide* (**2n**)

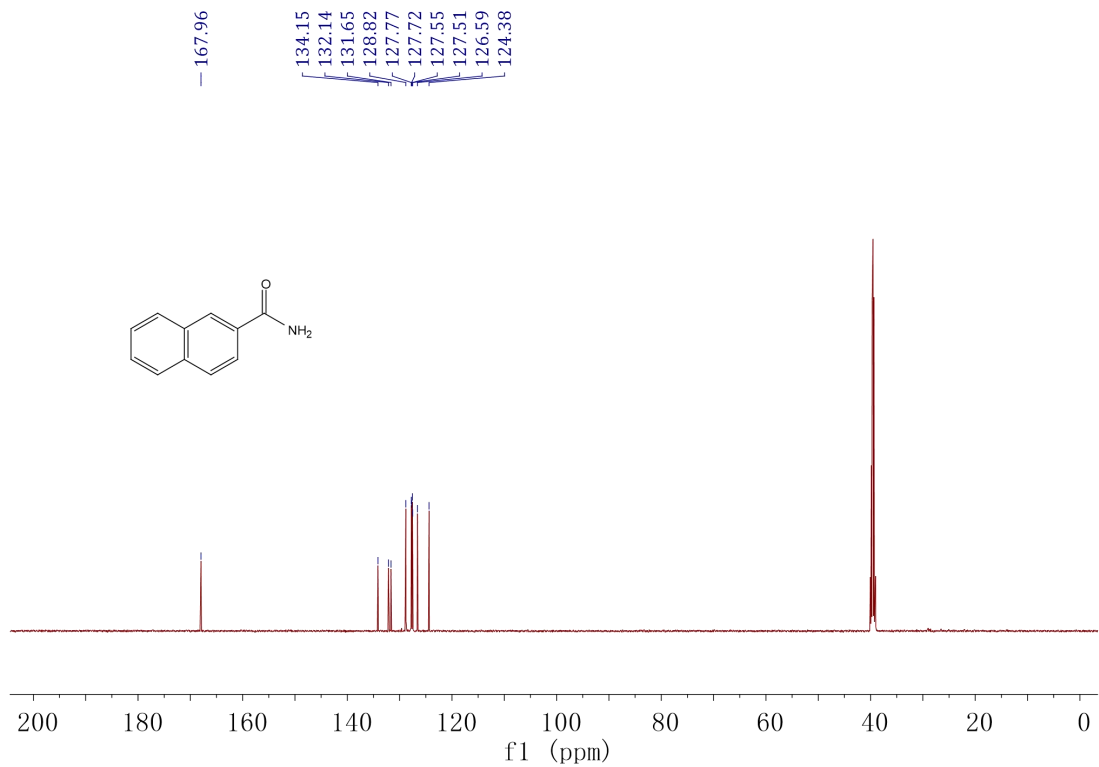

<sup>13</sup>C NMR: 2-naphthamide (**2n**)

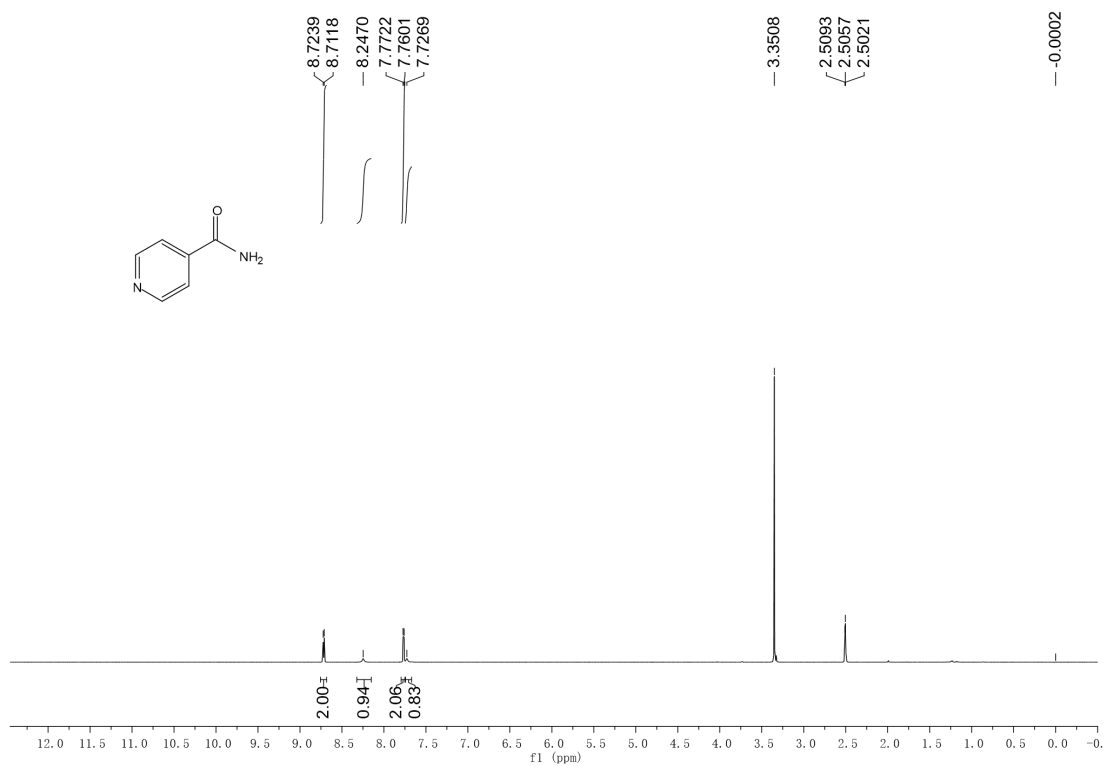

<sup>1</sup>H NMR: isonicotinamide (**2o**)

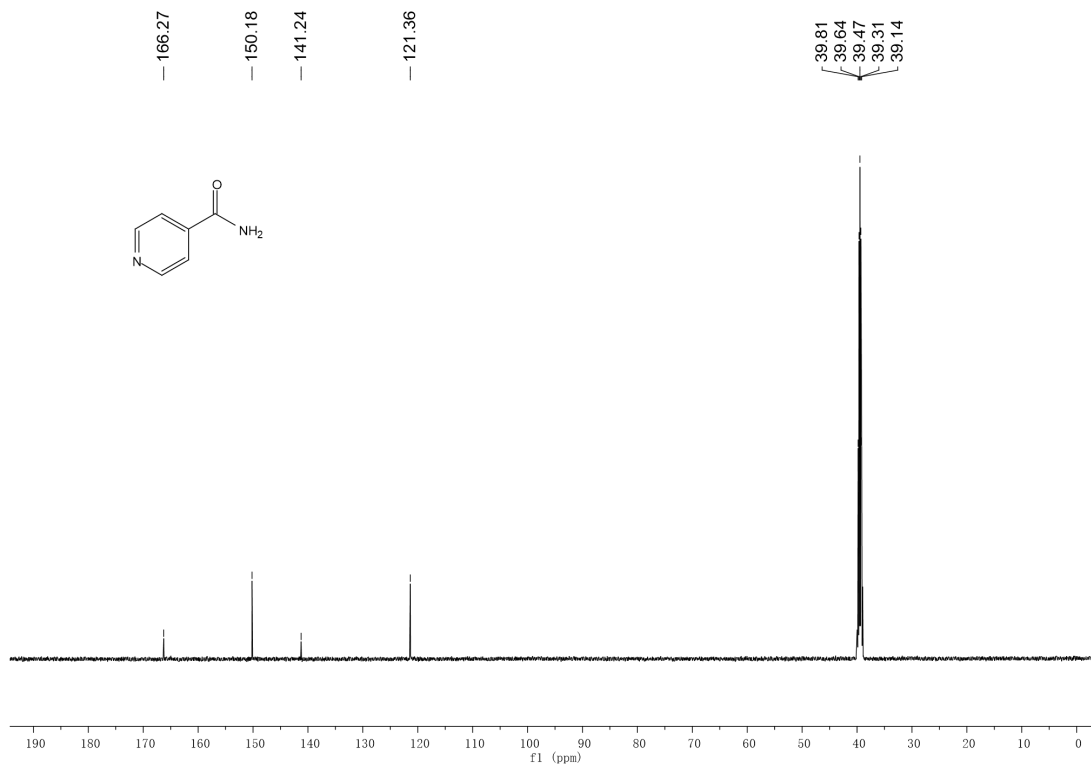

$^{13}\text{C}$  NMR: *isonicotinamide* (**2o**)

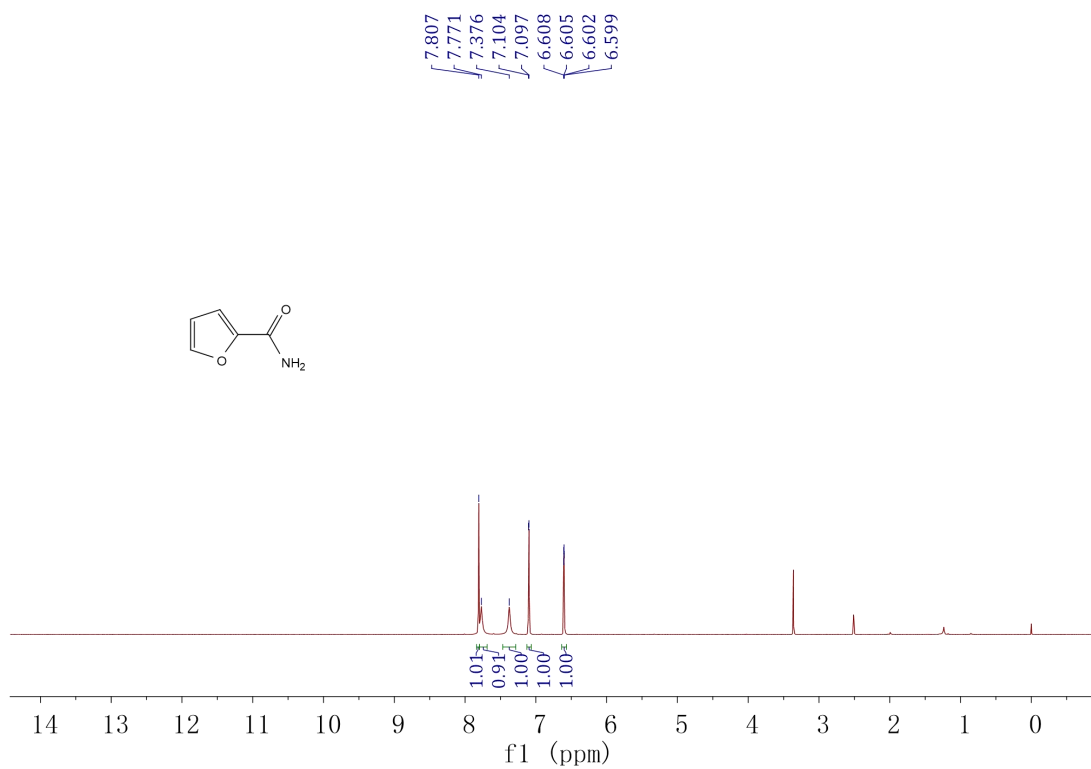

$^1\text{H}$  NMR: *furan-2-carboxamide* (**2p**)

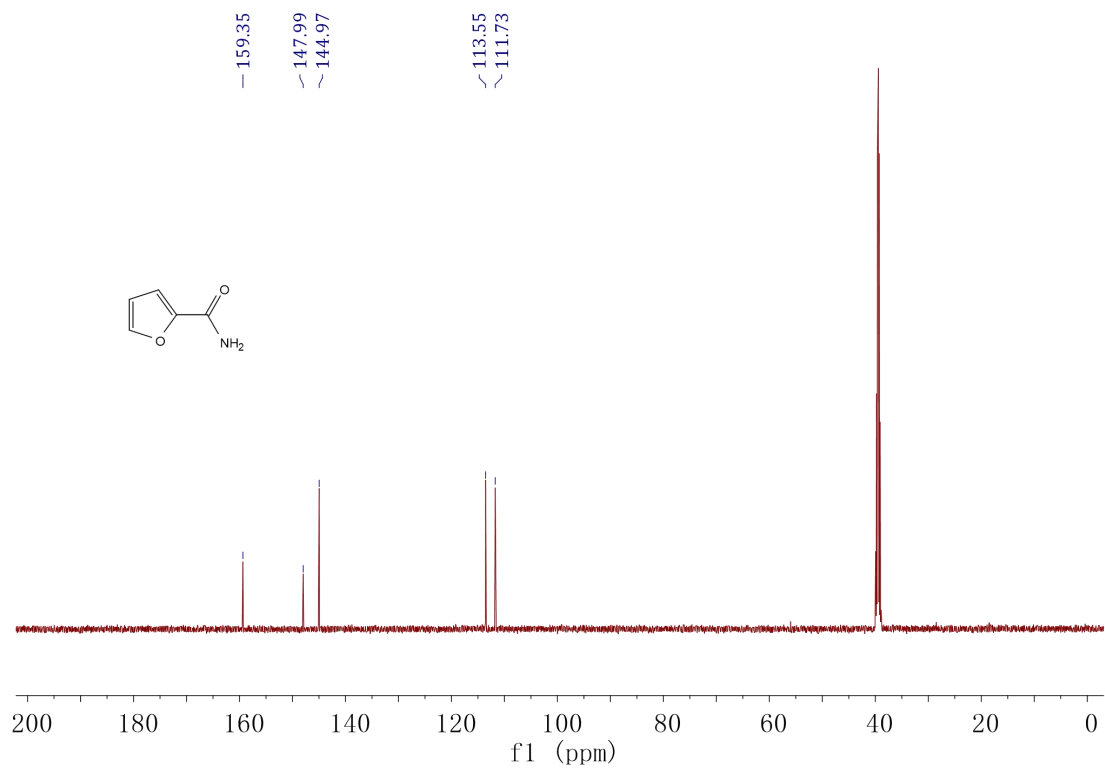

$^{13}\text{C}$  NMR: *furan-2-carboxamide* (**2p**)

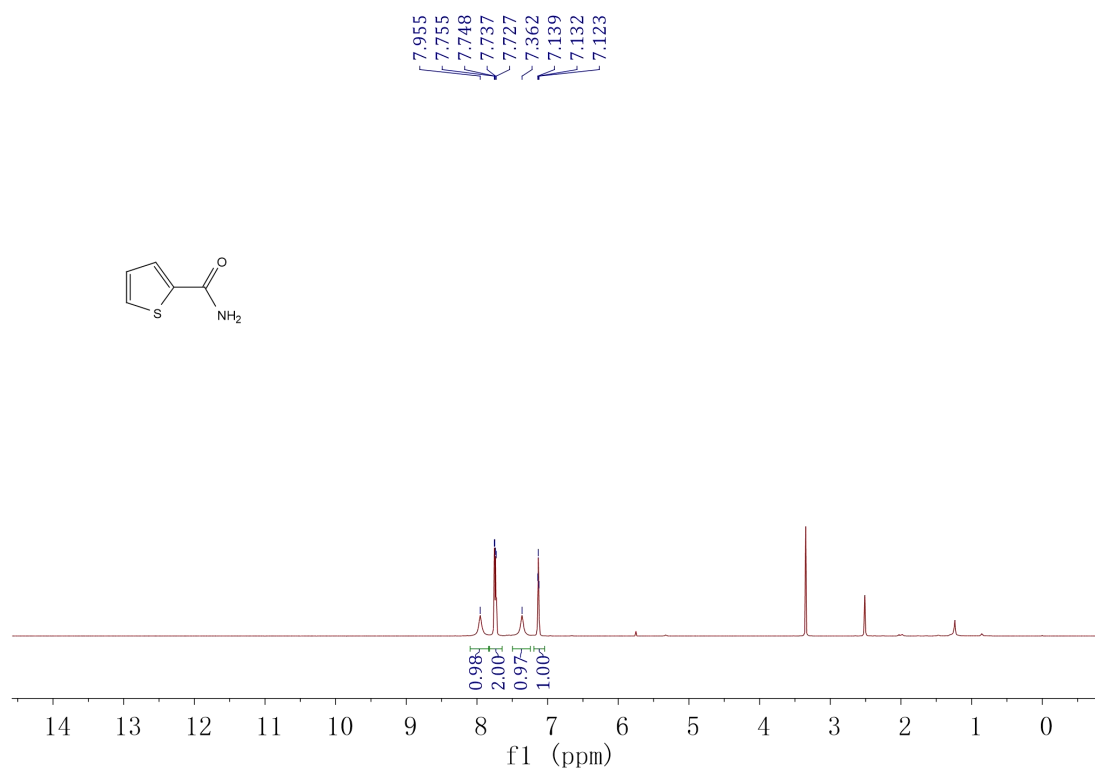

$^1\text{H}$  NMR: *thiophene-2-carboxamide* (**2q**)

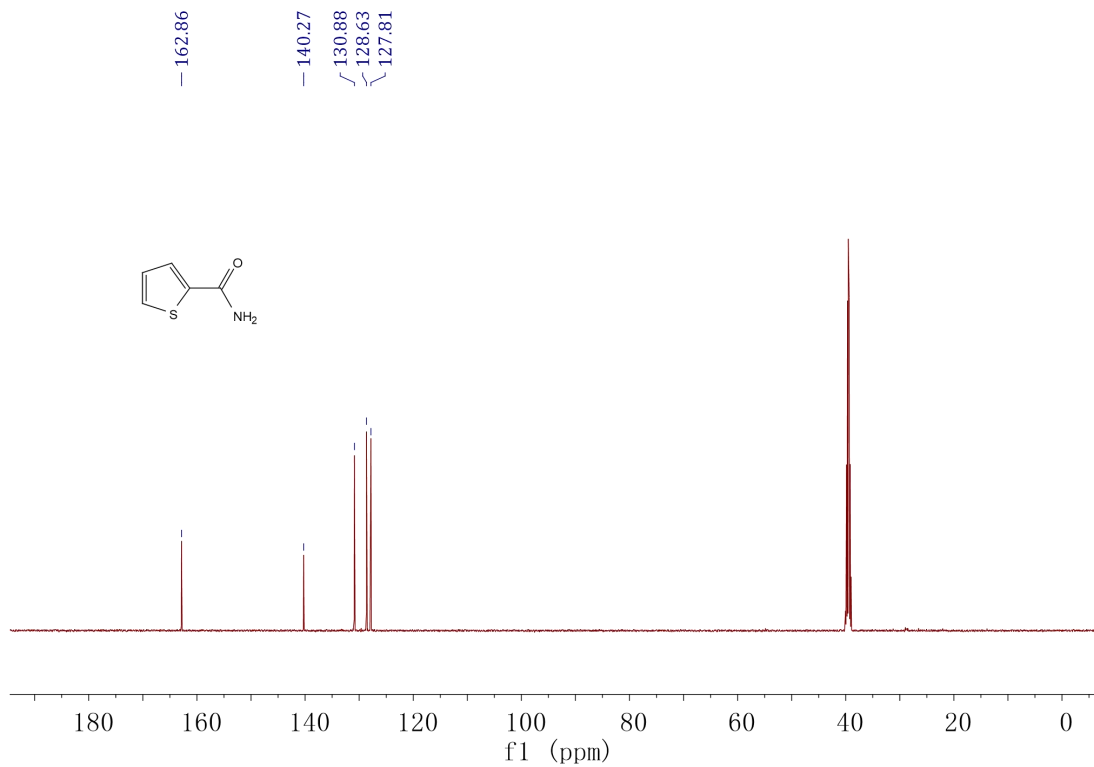

<sup>13</sup>C NMR: *thiophene-2-carboxamide (2q)*

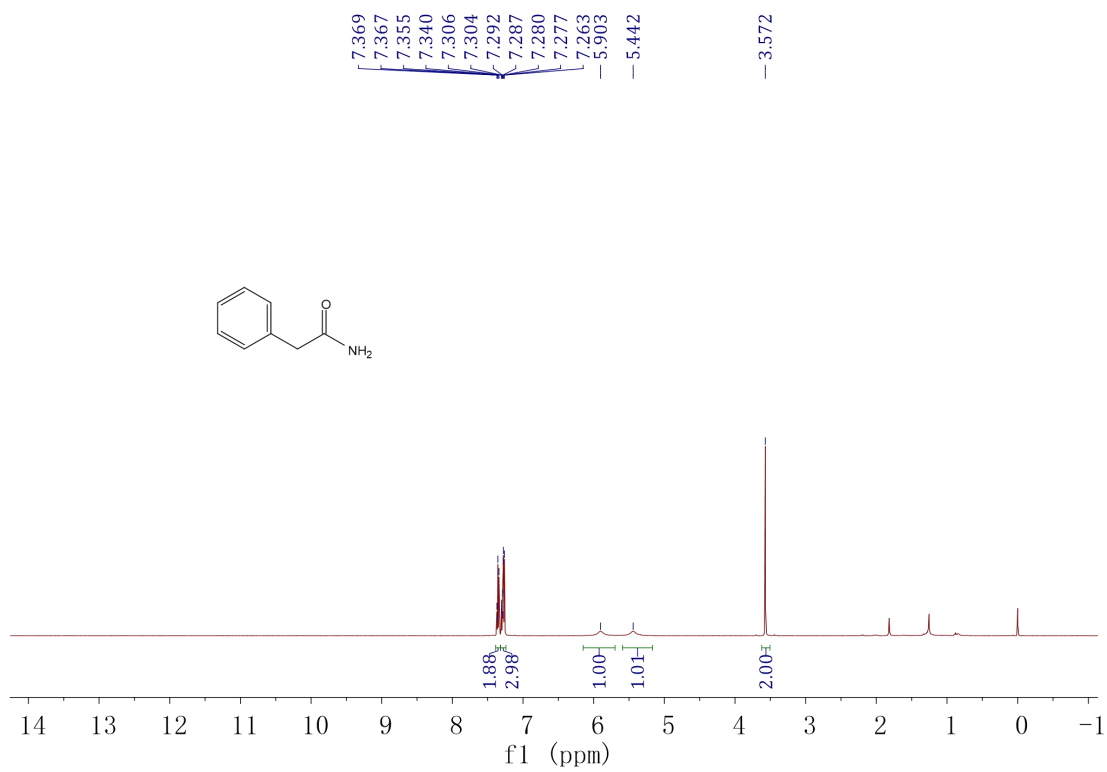

<sup>1</sup>H NMR: *2-phenylacetamide (2r)*



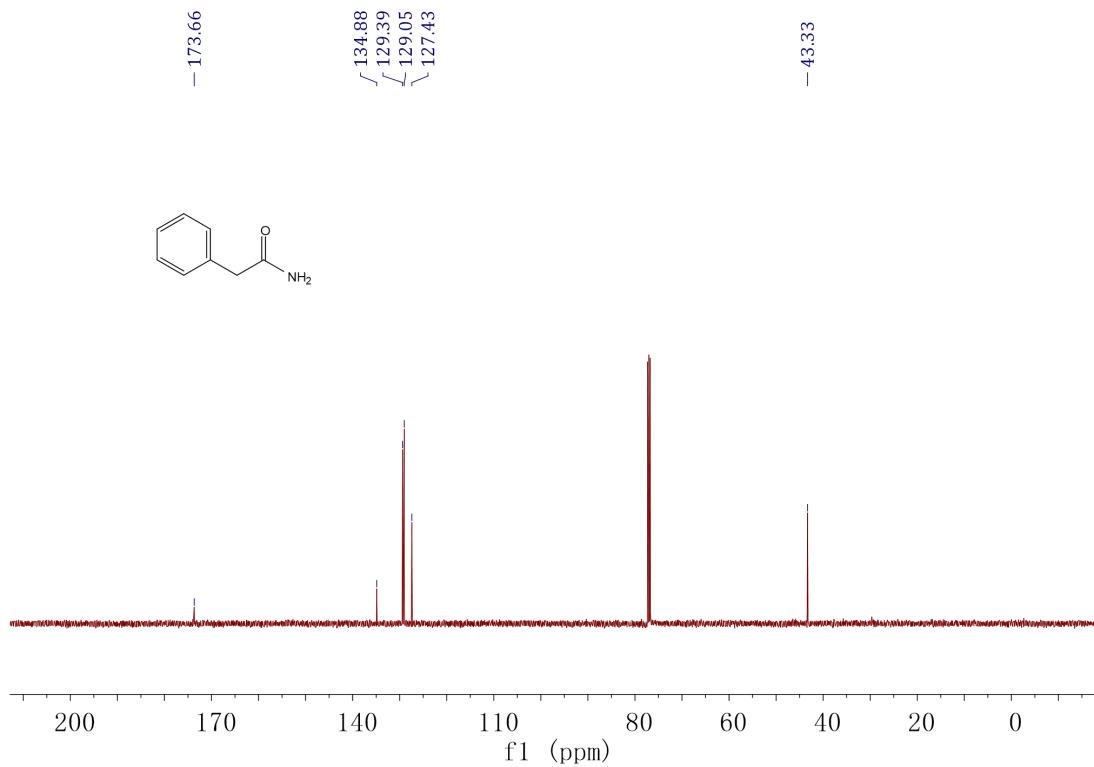

$^{13}\text{C}$  NMR: 2-phenylacetamide (**2r**)

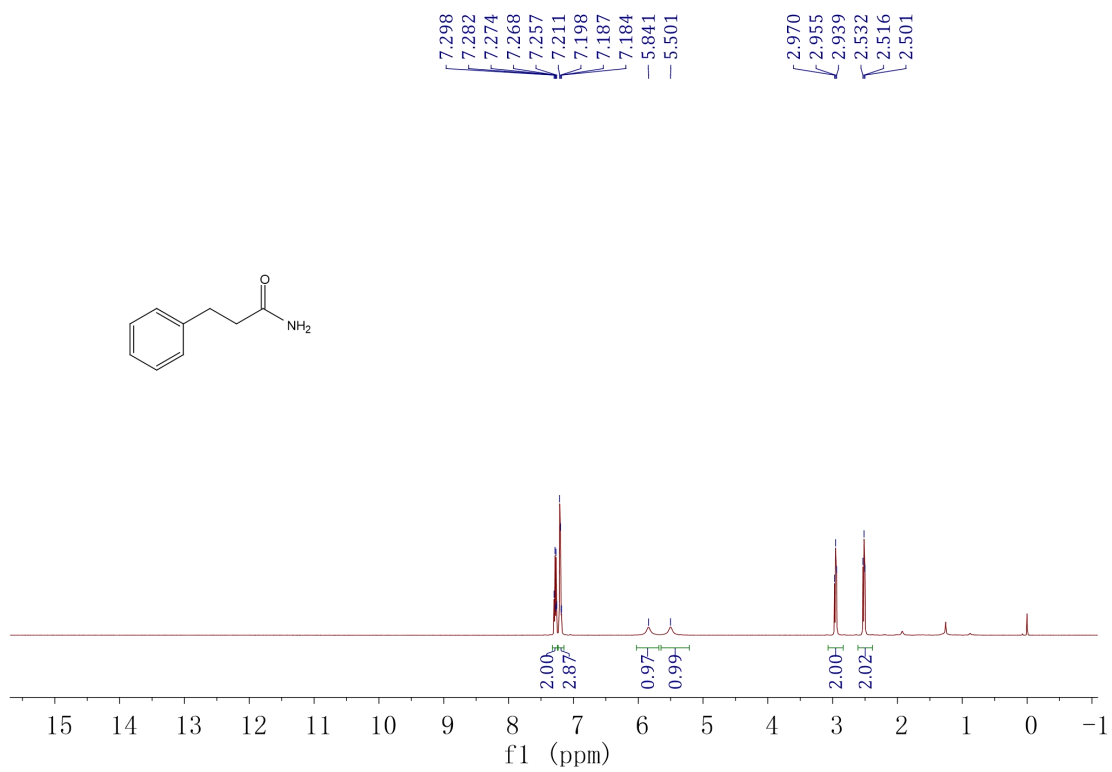

$^1\text{H}$  NMR: 3-phenylpropanamide (**2s**)

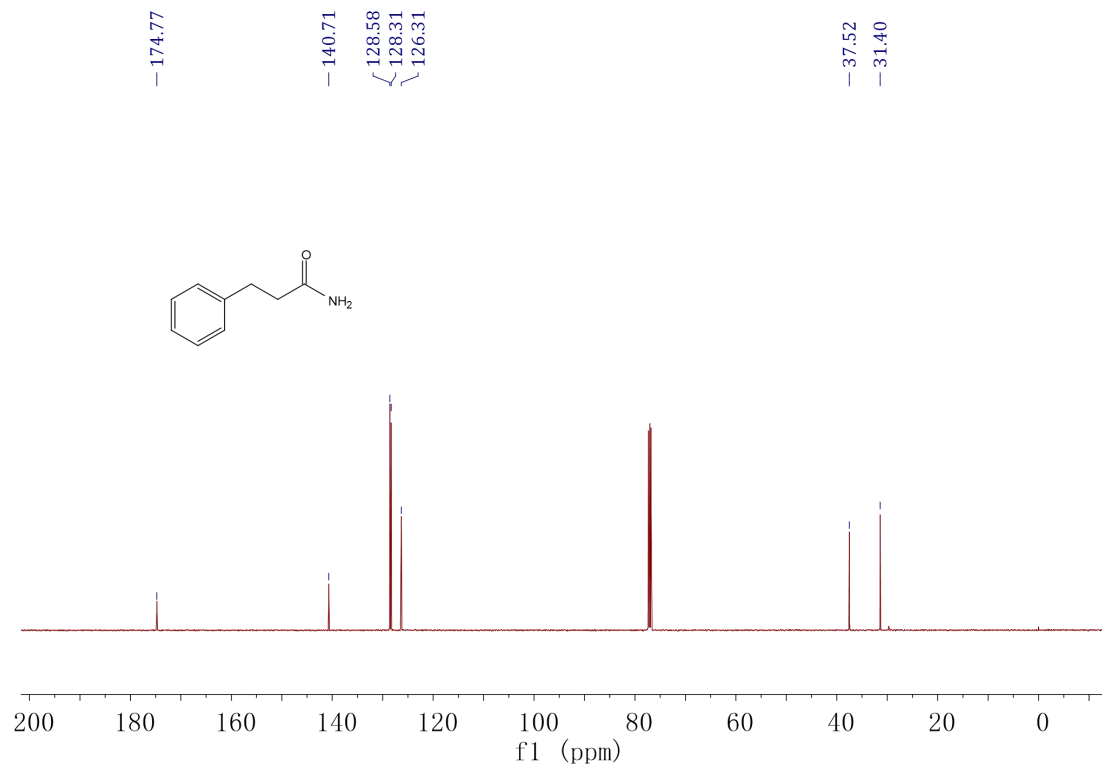

<sup>13</sup>C NMR: 3-phenylpropanamide (**2s**)

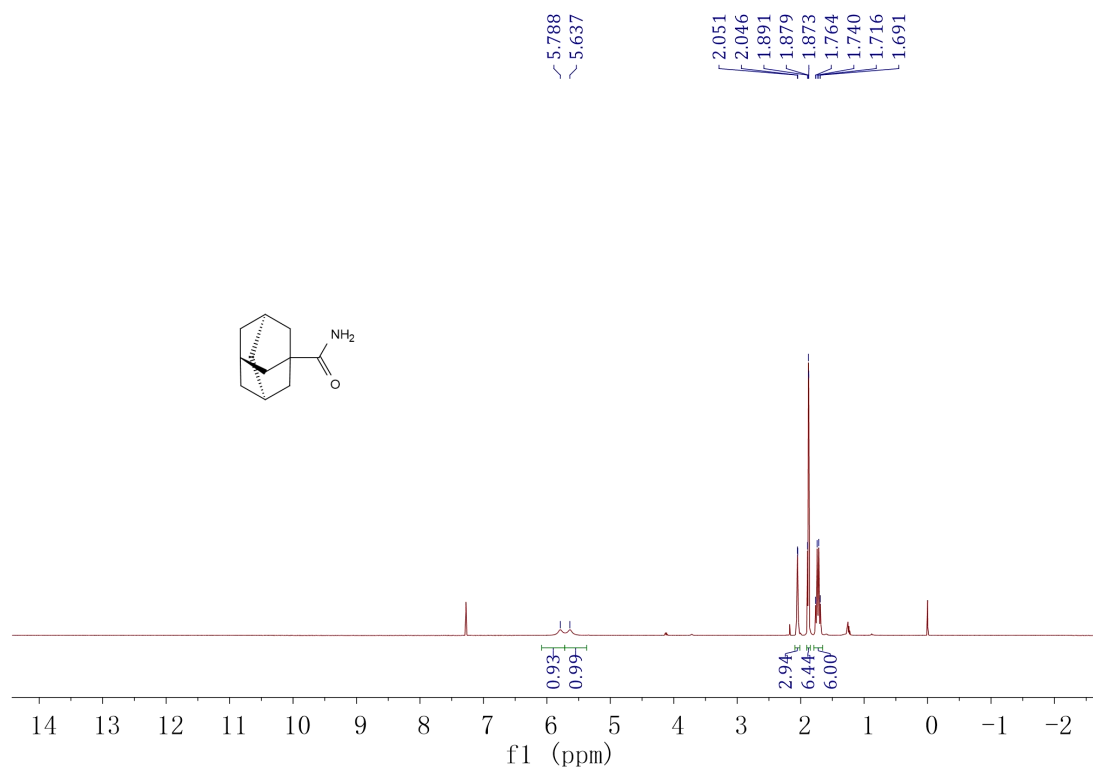

<sup>1</sup>H NMR: adamantane-1-carboxamide (**2t**)

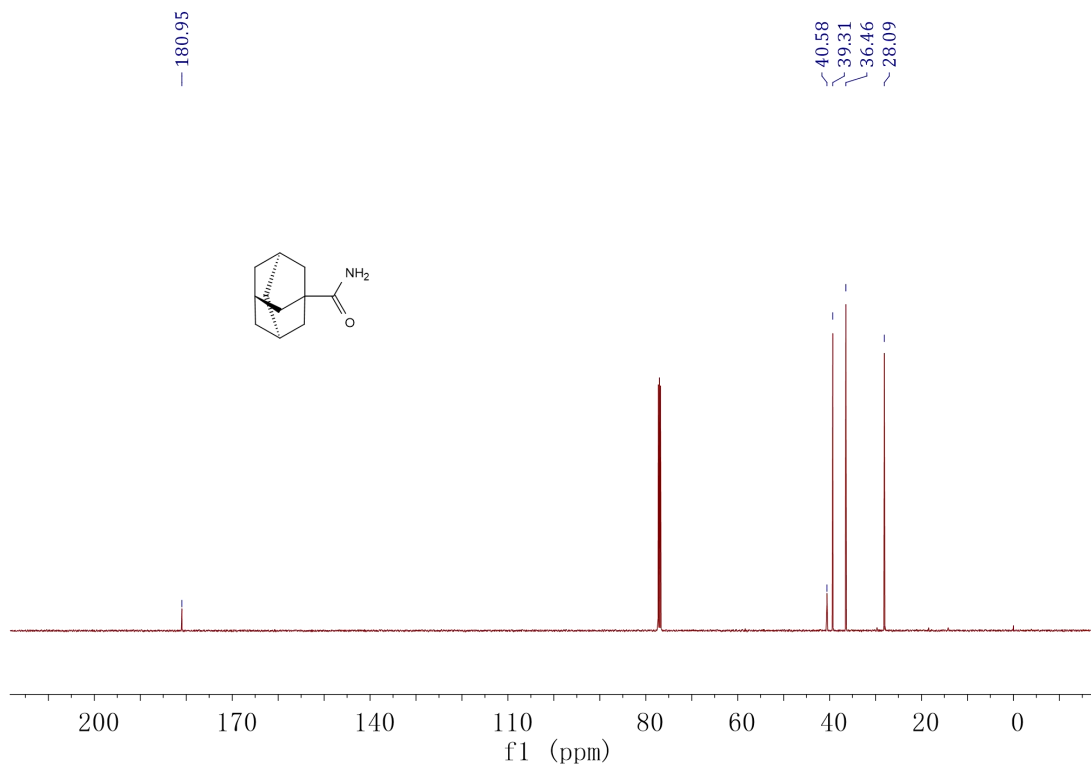

<sup>13</sup>C NMR: adamantane-1-carboxamide (2t)

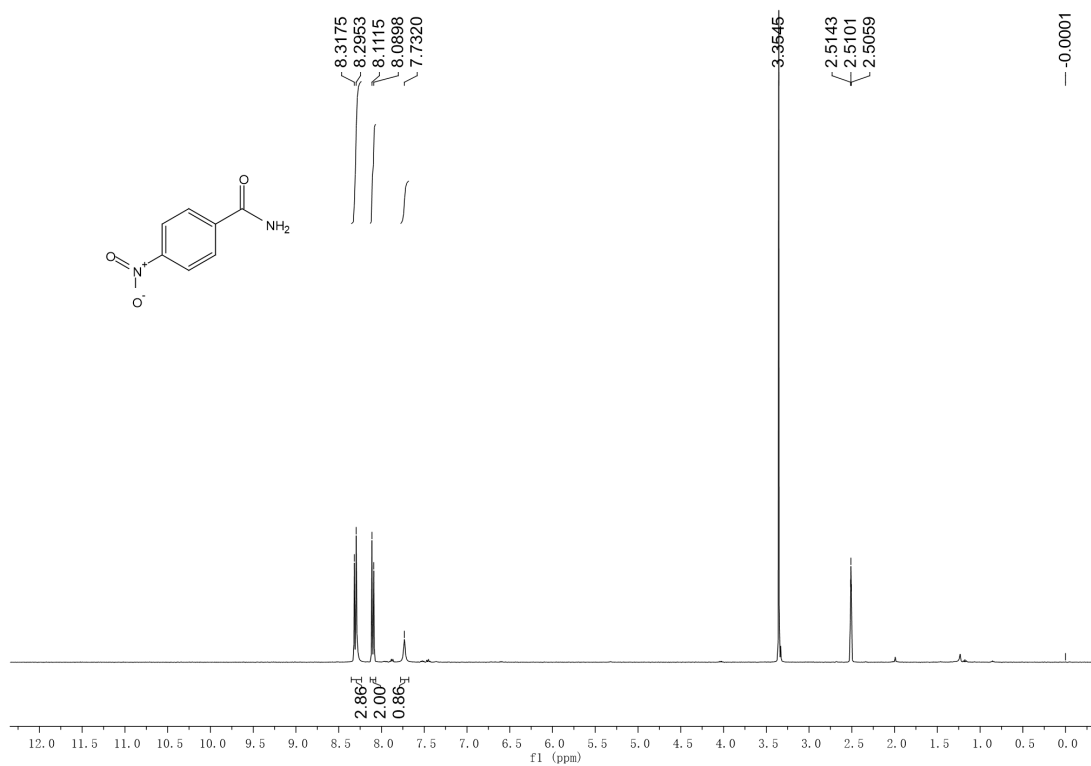

<sup>1</sup>H NMR: 4-nitrobenzamide (2ac)

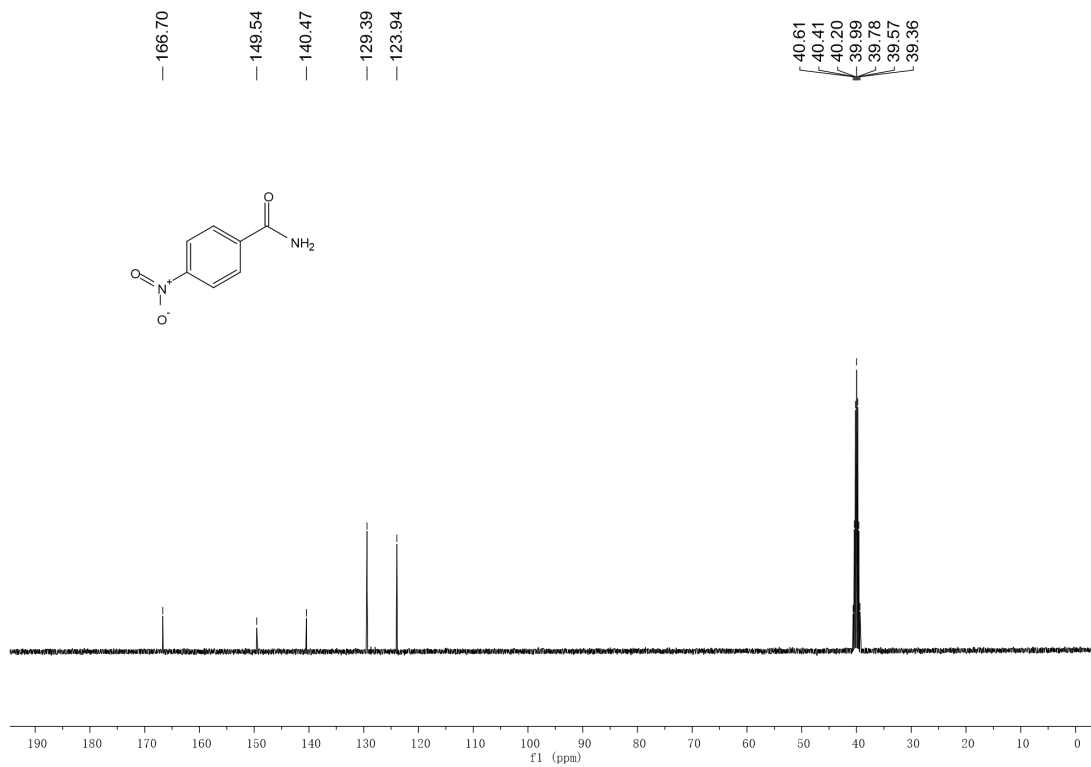

<sup>13</sup>C NMR: 4-nitrobenzamide (**2ac**)

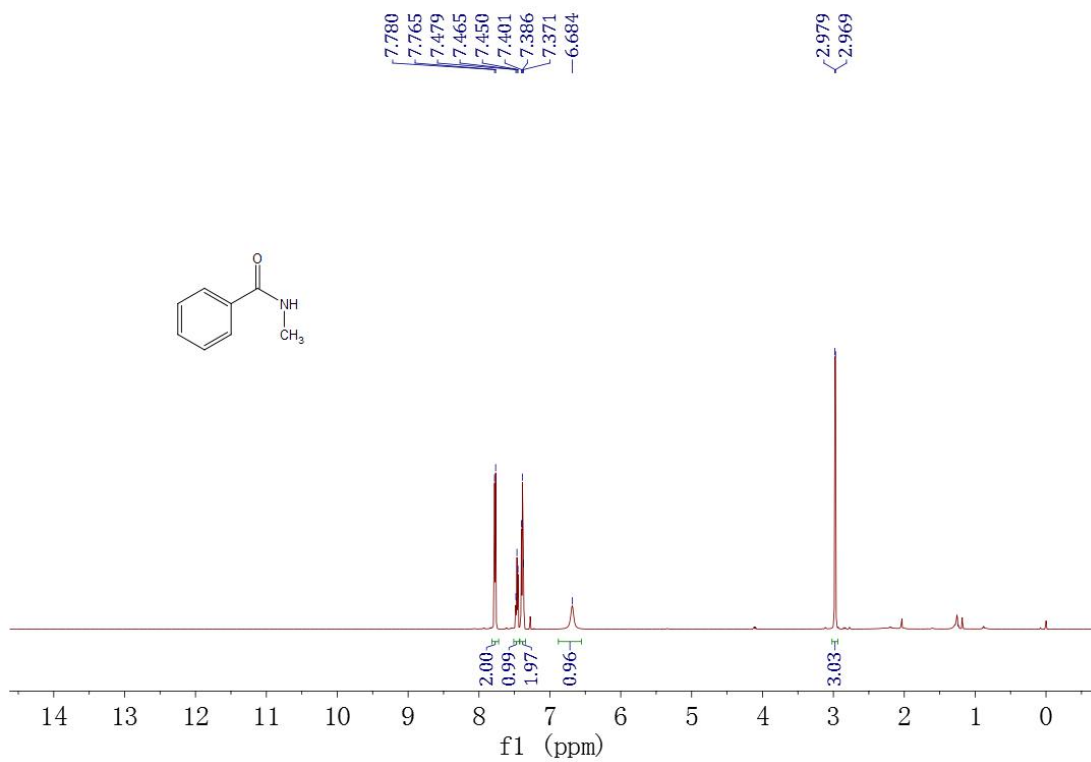

<sup>1</sup>H NMR: N-methylbenzamide (**2ad**)

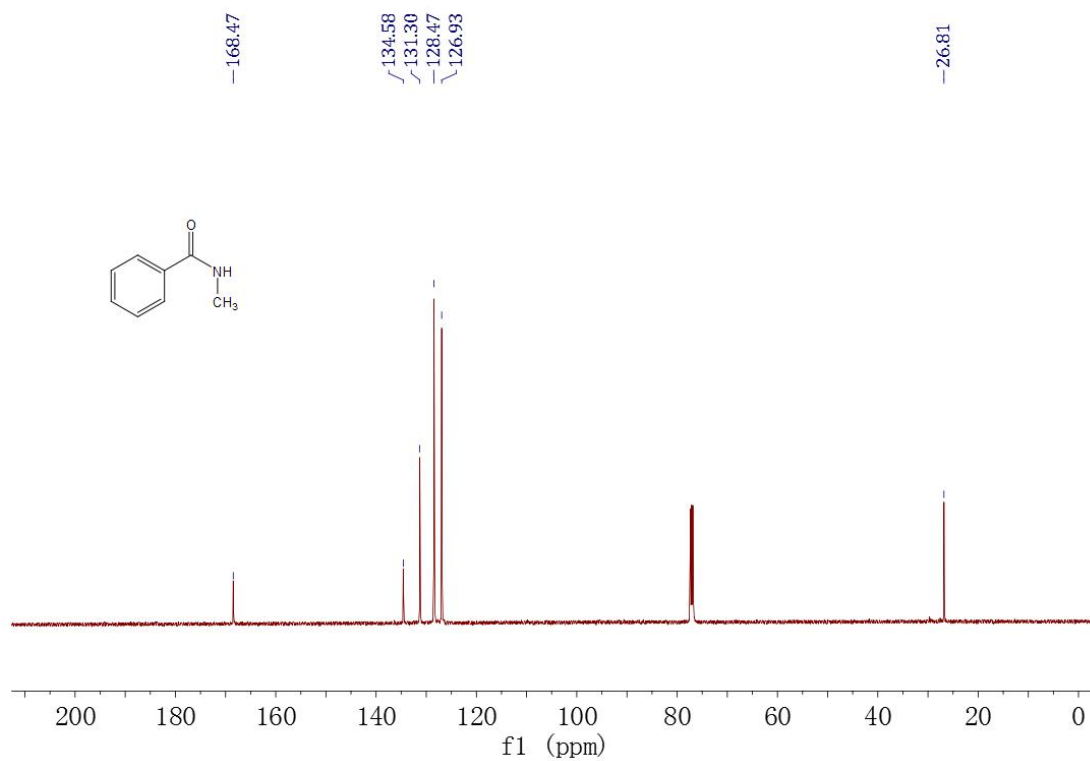

<sup>13</sup>C NMR: *N*-methylbenzamide (**2ad**)

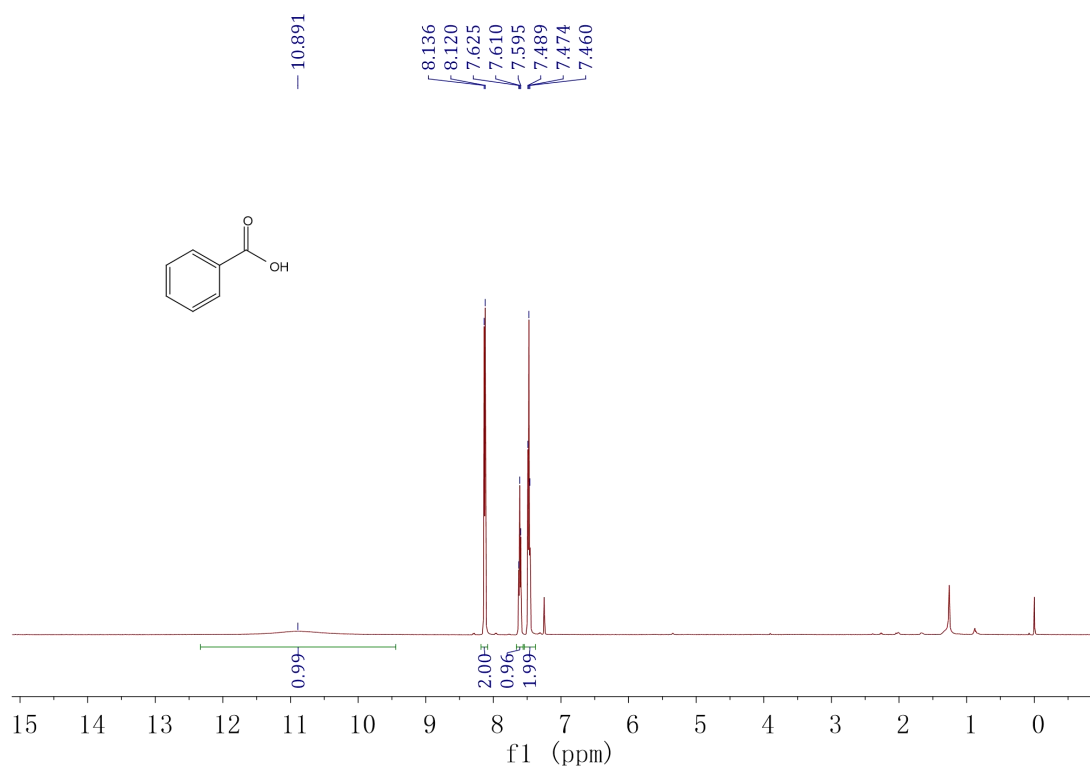

<sup>1</sup>H NMR: *benzoic acid* (**2ae**)

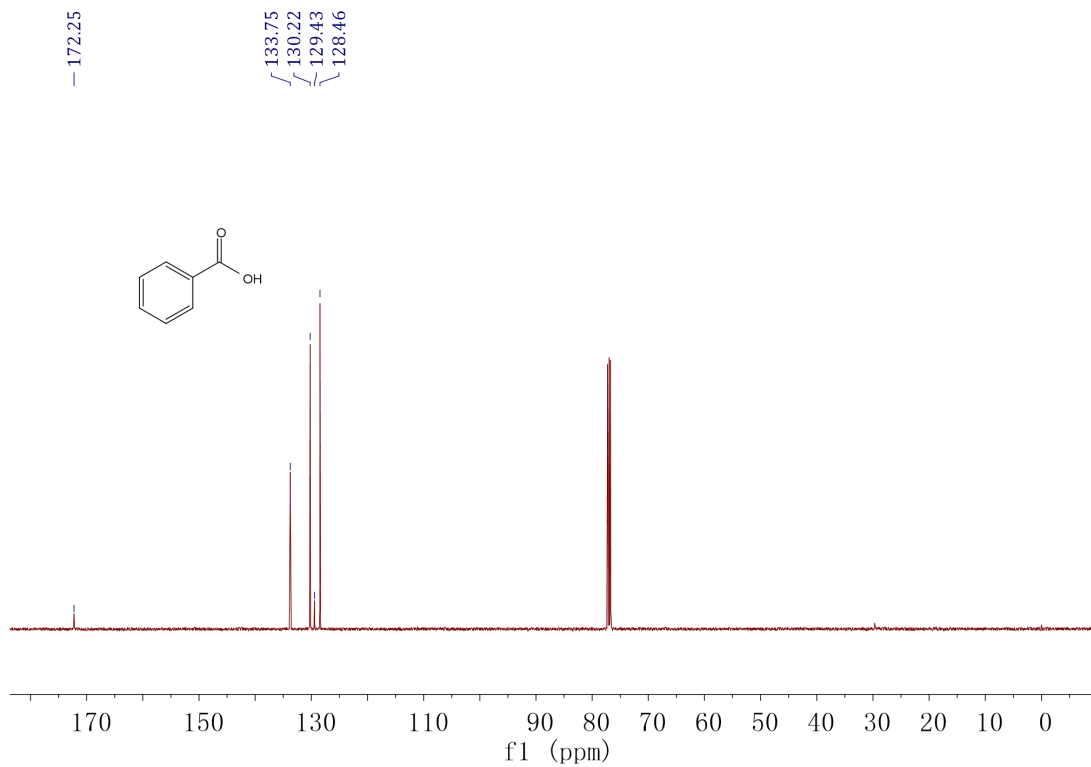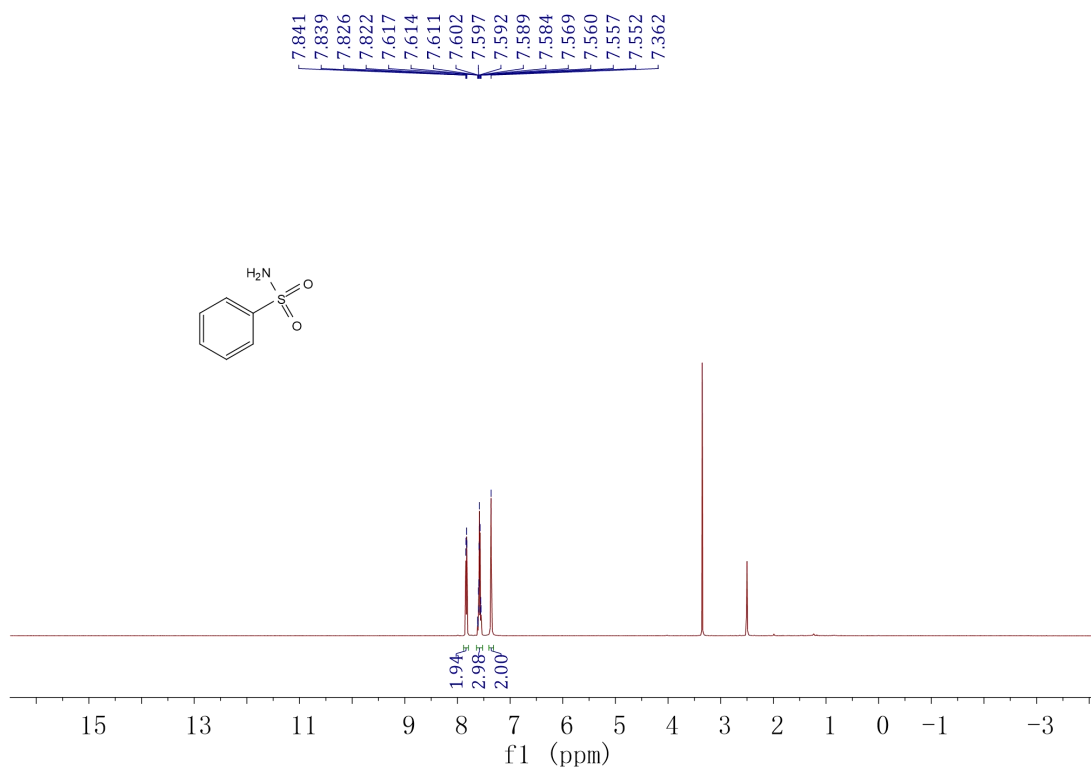

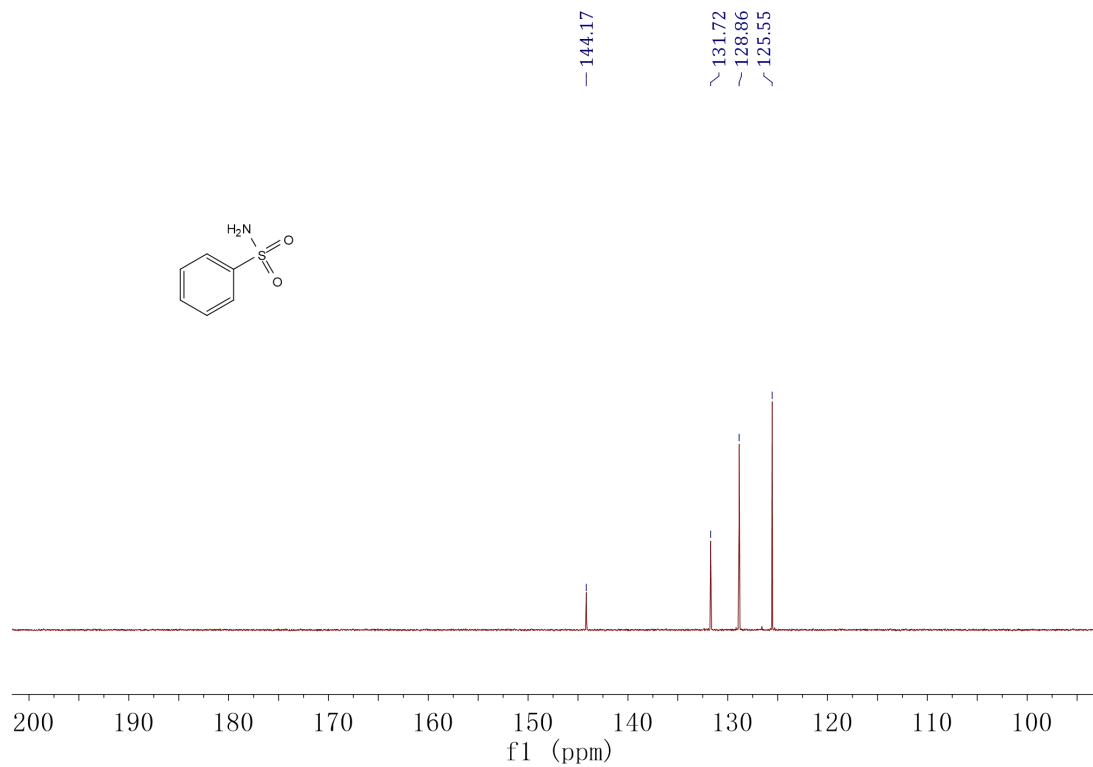

$^{13}\text{C}$  NMR: *benzenesulfonamide* (**4a**)

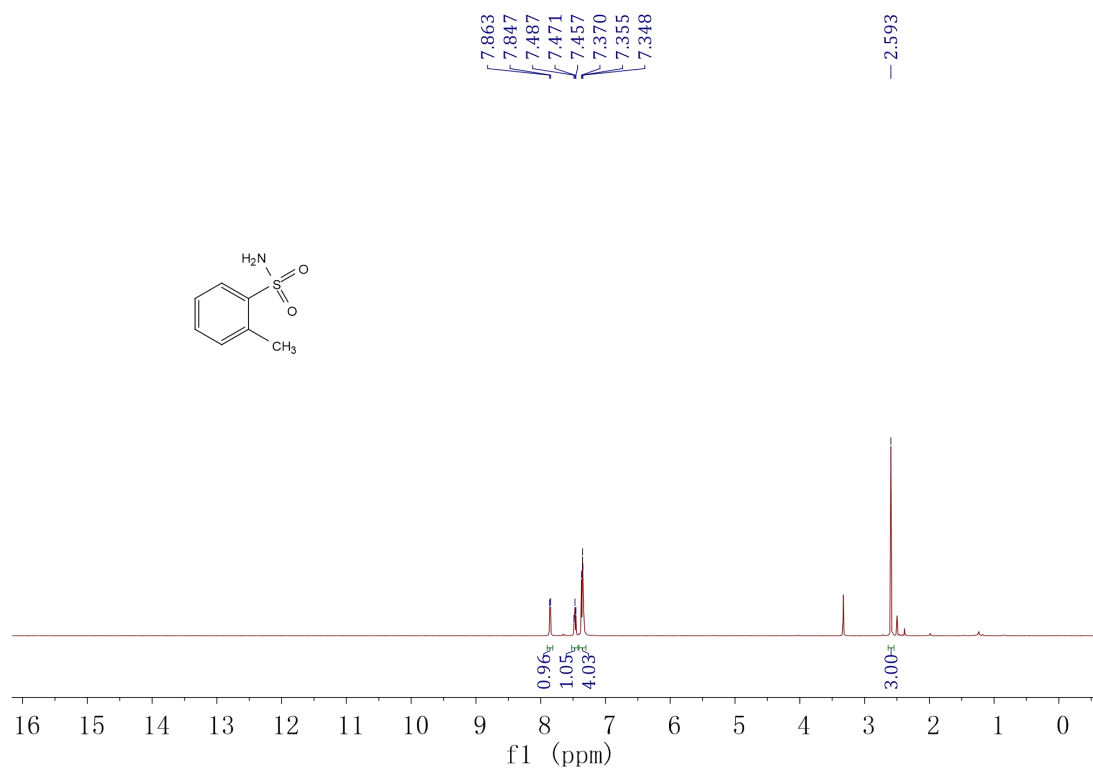

$^1\text{H}$  NMR: *2-methylbenzenesulfonamide* (**4b**)

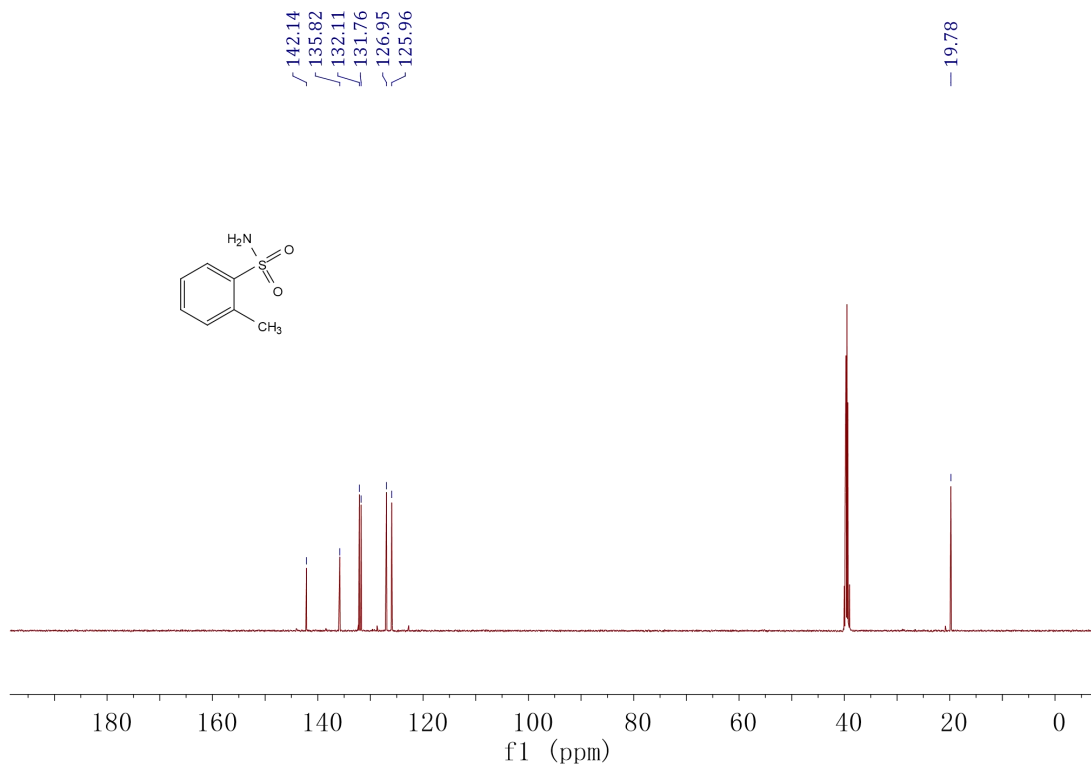

<sup>13</sup>C NMR: 2-methylbenzenesulfonamide (**4b**)

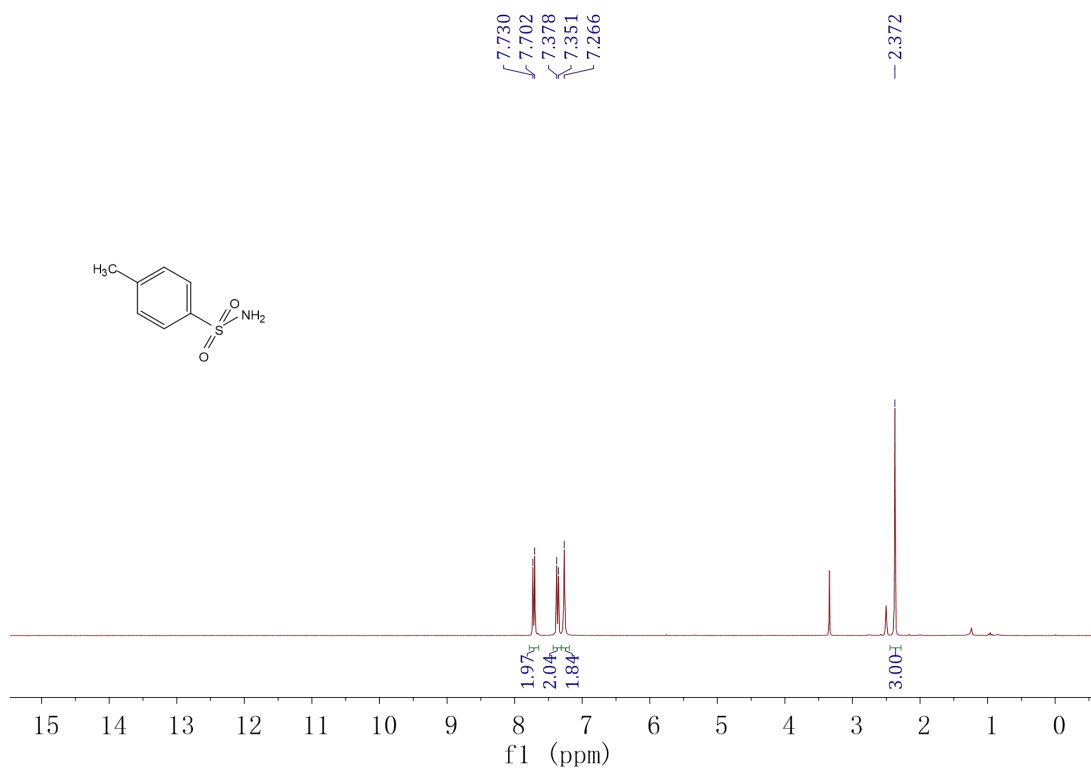

<sup>1</sup>H NMR: 4-methylbenzenesulfonamide (**4c**)



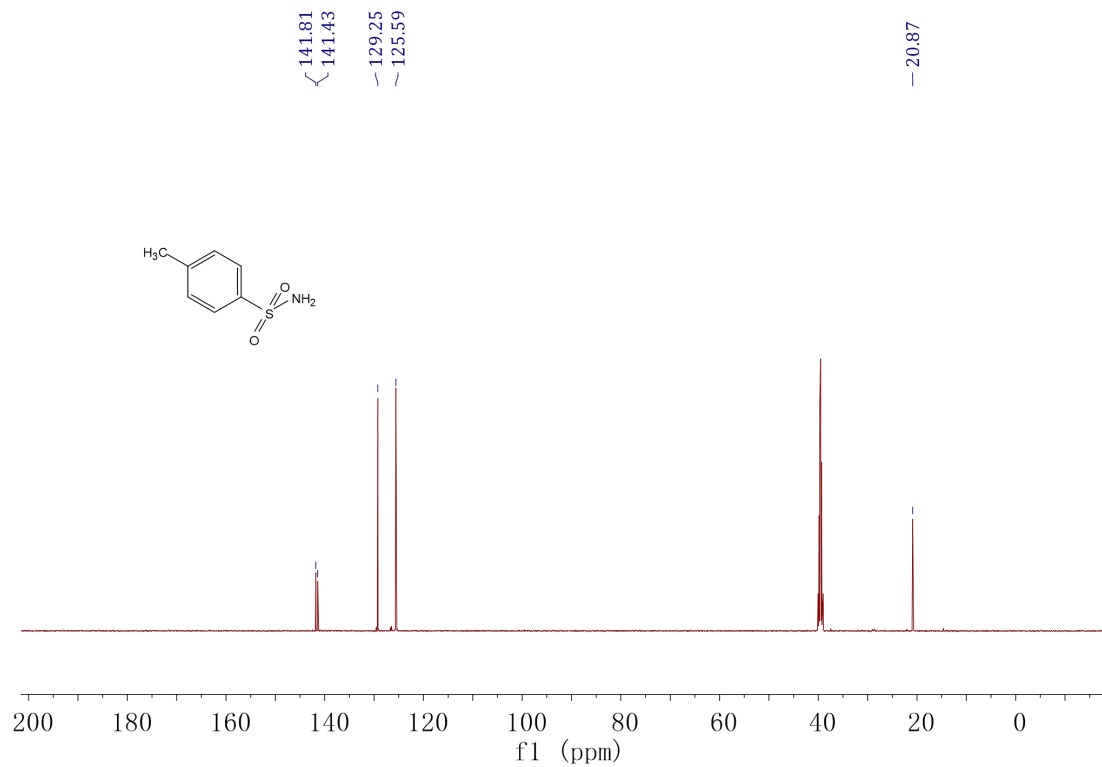

$^{13}\text{C}$  NMR: 4-methylbenzenesulfonamide (**4c**)

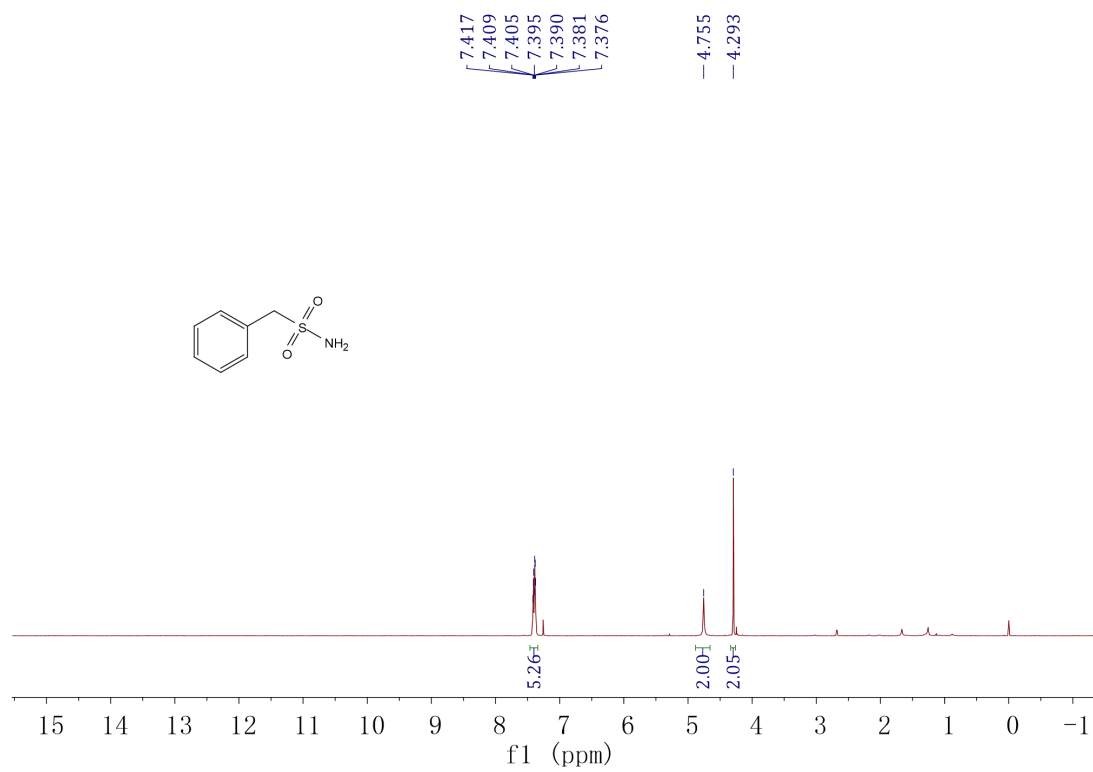

$^1\text{H}$  NMR: phenylmethanesulfonamide (**4d**)

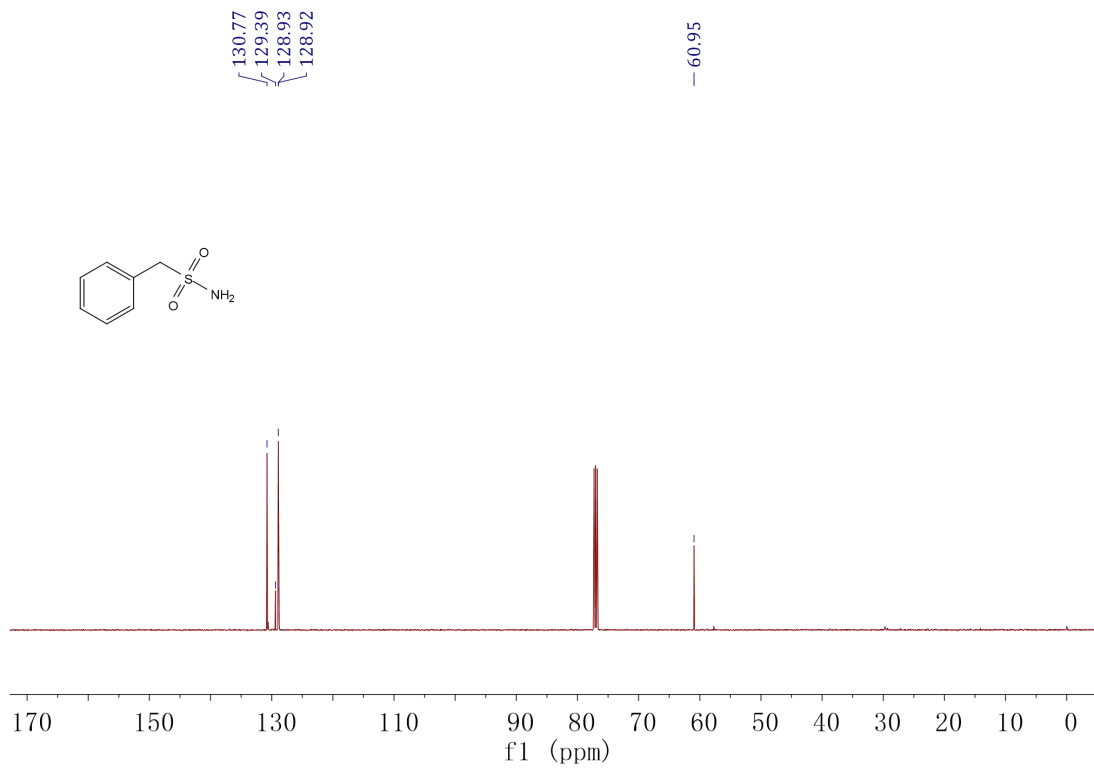

<sup>13</sup>C NMR: *phenylmethanesulfonamide (4d)*
